# Supplementary material for: Quality assessment of meta-analyses on soil organic carbon
Source: Copernicus journal article supplement (doi:10.5194/soil-9-117-2023), 2023-02-21
Supplement: Supplementary file 1 [file soil-9-117-2023-supplement.zip]

Archive with 2 entries (2 files):
- Supplementary material_SOIL.xlsx
- soil-9-117-2023-supplement-title-page.pdf
