# Supplementary material for: Quality assessment of meta-analyses on soil organic carbon
Source: Copernicus journal article supplement (doi:10.5194/soil-9-117-2023), 2023-02-21
Supplement: Supplementary file 1 [file soil-9-117-2023-supplement.zip › soil-9-117-2023-supplement-title-page.pdf]

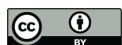

## *Supplement of*

# **Quality assessment of meta-analyses on soil organic carbon**

**Julia Fohrafellner et al.**

*Correspondence to:* Julia Fohrafellner ([julia.fohrafellner@boku.ac.at](mailto:julia.fohrafellner@boku.ac.at))

- [soil-9-117-2023-supplement-title-page.pdf](#)
- [Supplementary material\\_SOIL.xlsx](#)

The copyright of individual parts of the supplement might differ from the article licence.
