# Supplementary material for: Quality assessment of meta-analyses on soil organic carbon
Source: Copernicus journal article supplement (doi:10.5194/soil-9-117-2023), 2023-02-21
Supplement: Supplementary file 1 [file soil-9-117-2023-supplement.zip › Supplementary material_SOIL.xlsx]

## Sheet: Metadata
Document meta-data
Title	Supplementary material to: Quality Assessment of Meta-Analyses on Soil Organic Carbon
Version of document	Version 3
Corresponding article title	Quality Assessment of Meta-Analyses on Soil Organic Carbon
Corresponding article DOI preprint version	https://doi.org/10.5194/egusphere-2022-488
Authors	Julia Fohrafellner1, Sophie Zechmeister-Boltenstern2, Rajasekaran Murugan2, Elena Valkama3
Contact affiliation	1BIOS Science Austria, Dietrichgasse 27, 1130 Vienna, Austria 2Institute of Soil Research (IBF), Department of Forest- and Soil Sciences, University of Natural Resources and Life Sciences, Vienna (BOKU), Gregor-Mendel-Straße 33, 1180 Vienna, Austria 3Natural Resources Institute Finland (Luke), Bioeconomy and environment, Sustainability Science and Indicators. Tietotie 4, 31600 Jokioinen, Finland
Consulted meta-data creation	Clement Lattelais, INRAE France
Contact e-mail	Julia Fohrafellner / julia.fohrafellner@boku.ac.at
Production date (dd.mm.yyyy)	2022-03-28
Distribution date (dd.mm.yyyy)	2022-11-28
Description text	Supplementary material to a scientific article published in the journal "SOIL" in 2023. This document includes several sheets with information, which is described more detailed below in the table "Information on Excel sheets".
Language	English
Keywords	effect size; meta-analysis; soil management; synthesis; treatment effect; tillage; weighting; supplementary material
Type of data	Supplementary material
Grant number	European Union’s Horizon 2020 No. 862695 EJP SOIL
Project acronym	EJP SOIL
Project title	Towards climate-smart sustainable management of agricultural soils
Start date of the project (dd.mm.yyyy)	2020-02-01
Project duration	60 months
Start and end of data collection (dd.mm.yyyy)	05.01.2021 - 05.01.2021
Depositor	Julia Fohrafellner
Deposit date (dd.mm.yyyy)	2022-11-28
Term of use/license	CC BY 4.0
Citation requirements	Please cite the corresponding article when using this data
Contact for access	Julia Fohrafellner / julia.fohrafellner@boku.ac.at

## Sheet: Information on sheets
Information on Excel Sheets
Name of excel sheet	Table Number and title	Content description
Resources	Table S1: List of resources for assessing the quality of, reporting or creating meta-analyses in several disciplines	-
Scores for each meta-analysis	Table S2: 31 soil organic carbon meta-analyses and their individual scores per (sub)-criterium	Quantitative data on the 31 meta-analyses, studying managment effects on soil organic carbon (SOC), which were assessed for their quality according to a quality criteria-set, which is also shown in this sheet
Literature gathering	Table S3: Literature gathering	Information on where, when and how literature was collected and treated in order to collect the final 31 SOC meta-analyses
Screening	Table S4: Information on screening process	List of all retrieved articles, inlcuding screening decisions for inclusion or exclusion
Results per (sub)-criterium	Table S5: Results for all meta-analyses per group and (sub)-criterium	Results in total numbers and percentages of all 31 meta-analyses
IPCC	Table S6: Quick quality assessment of meta-analyses in IPCC report with the help of "cut-off" criteria	Quality assessment of meta-analyses in IPCC report Chapter 2: “Land–climate interactions”, of the Intergovernmental Panel on Climate Change (IPCC) “Special Report - Climate Change and Land” by Jia et al. (2019)*
Scores for MA passing cut-off	Table S7: Results for criteria 1-5 and 9-17 from meta-analyses that passed and did not pass the "cut-off" criteria	Percentage results for criteria 1-5 and 9-17 for meta-analyses that passed and that did not pass the cut-off criteria.
Template	Table S8: Template for quality assessment	Template for the quality assessment of meta-analyses, including the quality criteria-set
*Reference: Jia, G., Shevliakova, E., Artaxo, P., de Noblet-Ducoudré, N., Houghton, R., House, J., Kitajima, K., Lennard, C., Popp, A., Sirin, A., Sukumar, R., and Verch, L.: Land–climate interactions, in: Climate Change and Land: an IPCC special report on climate change, desertification, land degradation, sustainable land management, food security, and greenhouse gas fluxes in terrestrial ecosys…

## Sheet: Resources
Table S1: List of resources for assessing the quality of, reporting or creating meta-analyses in several disciplines.
Discipline	Name	Source	Authors (year)	Aim
Healthcare	Cochrane Handbook for Systematic Reviews of Interventions	https://training.cochrane.org/handbook#about-the-handbook	Higgins et al. (2021)	Guidance for the preparation/ maintenance of Cochrane Reviews
	AMSTAR and AMSTAR 2	https://amstar.ca/About_Amstar.php	Shea et al. (2007)	Quality assessment of systematic reviews
Social science	A Checklist of Questions for Evaluating Research Syntheses	Handbook of Research Synthesis and Meta-Analysis (2019a); Table 23.1	Cooper, Hedges and Valentine (2019a)	Guidance in research synthesis evaluation
Nonspecific	PRISMA 2020 Checklist	http://www.prisma-statement.org	Page et al. (2021)	Minimum set of items for reporting in systematic reviews and meta-analyses
	#ESTraining	https://synthesistraining.github.io	Stockholm Environment Institute and Collaboration for Environmental Evidence (n.d.)	Building capacity and increase the uptake, rigor and awareness of systematic evidence synthesis methodology
Environmental management	Guidelines and Standards for Evidence Synthesis in Environmental Management	https://environmentalevidence.org/information-for-authors/	Collaboration for Environmental Evidence (2018)	Conducting, commissioning or using the findings of systematic reviews and systematic maps in environmental management
	The Collaboration for Environmental Evidence Synthesis Appraisal Tool (CEESAT). Version 2.1.	https://environmentalevidence.org/ceeder/about-ceesat/	Collaboration for Environmental Evidence (2020)	Appraisal of the confidence that can be placed in the findings of an evidence review by assessing the rigour of the methods used, the transparency of reporting and the limitations imposed on synthesis by the quantity and quality of primary data
	ROSES for Systematic Review Reports Version 1.0	https://www.roses-reporting.com/systematic-review-reports	Haddaway, Macura, Whaley and Pullin (2017)	Reporting standards for systematic review reports
Ecology	Preferred reporting items for systematic reviews and meta-analyses in ecology and evolutionary biology: a PRISMA extension	https://onlinelibrary.wiley.com/doi/10.1111/brv.12721; Table 1	O’Dea et al. (2021)	PRISMA-EcoEvo is a minimum set of items for reporting systematic reviews and meta-analyses, which can also be used for planning, registration and reviewing
	Checklist of quality criteria for meta-analysis for research synthesis, peer review and editors	https://doi.org/10.1111/1365-2745.12224; Table 2	Koricheva and Gurevitch (2014)	Checklist for quality criteria for ecological meta-analysis
Agronomy	Definition of the eight criteria used to assess the quality of meta-analyses	https://www.sciencedirect.com/science/article/abs/pii/S016788091100404X?via%3Dihub; Table 1	Philibert et al. (2012)	Assessing the quality of meta-analyses in agronomy
	Summary of prominent systematic and meta-analytical reviews of organic agriculture (OA) and conservation agriculture (CA)	https://doi.org/10.1017/S0014479719000012; Table 1 and 2	Krupnik et al. (2019)	Assessing the quality of meta-analyses in agronomy, examples on organic and conservation agriculture; partly based on criteria from Philibert et al. (2012)
	Percentage of meta-analyses satisfying each of the 20 quality criteria	https://www.sciencedirect.com/science/article/pii/S2352340919302495?via%3Dihub; Table 7	Beillouin et al. (2019)	Quality assessment of selected crop diversification meta-analyses based on an extended and updated version of the quality checklist of Philibert et al. (2012)

## Sheet: Scores for each meta-analysis
Table S2: 31 soil organic carbon meta-analyses and their individual scores per (sub)-criterium
							Meta-analysis identification number	1	2	3	4	5	6	7	8	9	10	11	12	13	14	15	16	17	18	19	20	21	22	23	24	25	26	27	28	29	30	31
							Authors (year)	Aguilera, Luis Lassaletta, Gattinger and Gimeno (2013)	Angers and Eriksen-Hamel (2008)	Bai, Huang, Ren, Coyne, Jacinthe, Tao, Hui, Yang and Matocha (2019)	Chen, Camps-Arbestain, Shen, Singh and Cayuela (2018)	Cooper et al. (2016)	Feng, An, Chen and Wang (2020)	García-Palacios et al. (2018)	Gattinger, Haeni, Müller and Skinner (2012)	González-Sánchez, Ordóñez-Fernández, Carbonell-Bojollo, Veroz-González and Gil-Ribes (2012)	Haddaway, Hedlund, Jackson, Kätterer, Lugato, Thomsen, Jørgensen and Isberg (2017)	Han, Wang, Zhang and Sun (2016)	Jian, Du, Reiter and Stewart (2020)	King and Blesh (2018)	Kopittke, Dalal, Finn and Menzies (2017)	Ladha, Reddy, Padre and van Kessel (2011)	Li, Li, Chang, Cui, Jagadamma, Zhang and Cai (2020)	Liu, Zhang, Zong, Hu, Wu, Zhou, Jin and Zou (2016)	Luo, Wang and Sun (2010)	Maillard and Angers (2014)	Majumder, Neogi, Dutta, Powel and Banik (2019)	Mathew, Shimelis, Mutema, Minasny and Chaplot (2020)	McDaniel, Tiemann and Grandy (2014)	Meurer, Haddaway, Bolinder and Kätterer (2018)	Mondal, Chakraborty, Bandyopadhya, Aggarwal, Singh Rana (2020)	Ogle, Breidt and Paustian (2005)	Poeplau and Don (2015)	Sun, Canadell, Lijun Yu, Lingfei Yu, Zhang, Smith, Fischer and Huang (2020)	Tuomisto, Hodge, Riordan and Macdonald (2012)	Virto, Barré, Burlot and Chenu (2012)	Xia, Lam, Wolf, Kiese, Chen, Butterbach-Bahl (2018)	Xu, Sieverding, Kwon, Clay, Stewart, Johnson, Qin, Karlen, Wang (2019)
							Management practices under investigation	tillage (no-till or reduced tillage - conventional tillage), amendments, organic, cover crop, combined and fertilization	no-till - full inversion tillage	conservation agriculture - conventional (no-till or reduced tillage - conv. tillage, cover crop, biochar)	organic amendments and fertilizer	no-till or reduced - conv. tillage, organic systems	deep tillage - conv. Tillage	organic - conventional	organic - conventional	no-till or minimum tillage or cover crop - conv. tillage	no-till, intermediate, conv. Tillage	straw retention and fertilizer	cover crop	diverse crop rotations - grain-only rotations	tillage, organic and amendments	fertilizer	no-till or reduced tillage plus residue retention - conv. tillage	biochar	no-till - conv. tillage	manure	biochar	crop species	crop rotation/diversity	no-till, intermediate, conv. Tillage	no-till - conv. tillage	tillage, high input systems, set-aside	cover crop	conservation agric. (no-till plus residue retention and cover crop - conv. Tillage)	organic	no-till - inversion tillage	straw return plus fertilization - fertilization	corn stover residues	Total N of MA:	31
Group		Quality criteria	Sub-criteria	Is criterion applied in Meta-analysis (and to what extent)	Score	Description	Full references																																Sum of scores reached by all MA per sub-criterion	Maximum reachable scores per sub-criterion	Sum of scores reached by all MA per quality criterion	Maximum reachable scores per quality criterion	Scores reached by all MA per sub-criterion (%)
Literature search and inclusion / exclusion criteria		1. Literature search	Published literature extracted from	> 4 databases	3	Several databases should be used for extracting published literature to reduce the risk of selection bias	"It might be tempting to use a single database, such as the widely available Web of Science. However, no database is complete, and the use of multiple databases will make the search more comprehensive (thereby reducing selection bias)" (Côté et al. 2013, p. 40).	1	0	1	1	2	1	1	0	0	3	2	3	1	2	0	2	0	0	2	0	3	1	3	1	0	0	1	1	1	3	1	37	93	64	155	39.7849
				between 2 and 4 databases	2
				1 database	1
				not reported	0
			Grey literature (unpublished reports and experiments, project reports etc.) included	yes	1	Grey literature maximizes comprehensiveness and reduces risk of bias. Whether conducting a grey literature research is necessary or not is dependent on the meta-analysis itself and needs to be assessed by the authors	"Despite the increased resources that are needed to locate and retrieve data from sources such as dissertations, theses, conference papers, government and technical reports and the like, it is generally indefensible to conduct a synthesis that categorically excludes these types of research reports. Potential benefits and costs of grey literature searches must be balanced against each other" (Bore…	1	0	0	0	1	0	0	1	0	1	0	0	0	0	0	0	0	0	0	0	0	0	1	0	0	1	1	0	0	0	1	8	31			25.8065
				no	0
			Keywords/search string reported	yes	1	The search string(s) used to retrieve literature from different databases should be stated	"The search strategy will list all the search terms you anticipate using when searching electronic databases. The choice of keywords is critical" (Côté et al. 2013, p. 43).	1	0	1	1	1	1	0	0	0	1	1	1	1	0	0	1	0	0	1	0	1	1	1	1	0	0	1	1	0	1	1	19	31			61.2903
				no	0
		2. Authors checked the reference lists of other existing meta-analyses and reviews for available literature		yes	1	Ensures the inclusion of more relevant articles, as occasionally, keyword searching in databases does not provide results for all available literature	"Even with the advent of (and perhaps partly due to an over-reliance on) electronic searching, it is likely that some studies which meet our criteria will escape our search and not be included in the analysis" (Borenstein et al. 2009, p. 278).	0	1	0	1	1	0	1	0	0	1	0	1	0	0	0	0	0	0	0	0	0	0	1	0	0	0	0	0	0	0	0	7	31	7	31
				no	0
		3. Inclusion and exclusion criteria reported		yes	1	Inclusion and exclusion criteria should be clearly described and decisions for exclusion of studies should be transparent	"When planning a systematic review we develop a set of inclusion criteria that govern the types of studies that we want to include" (Borenstein et al. 2009, p. 278). "Outline clear study selection criteria so that the reasons for inclusion or exclusion of studies are transparent" (Côté et al. 2013, p. 50).	1	1	1	1	1	1	1	1	0	1	1	1	1	1	1	1	1	1	1	0	0	1	1	1	1	1	1	1	1	1	1	28	31	28	31
				no	0
		4. Control (C) and treatment (T) described		yes	1	Inclusion of studies on the same research topic and avoiding mixing "apples and oranges". The controls of included studies should be comparable to allow the correct computation of the treatment and moderator effect	"There are four critical components to questions regarding effectiveness posed in a research synthesis: (1) the subject (population or subpopulation to be examined), (2) the intervention (treatment or other independent variable of interest), (3) the outcome(s) or responses of interest, and (4) where applicable, the comparison or control group" (Stewart et al. 2013, p. 28).	1	1	1	1	1	1	1	1	1	1	1	1	1	1	1	1	1	1	1	0	0	1	1	1	0	1	1	1	1	1	1	28	31	28	31
				no	0
		5. Moderators and their ranges or groups described		yes	1	Defining moderators is essential to evaluate the source of variation across studies. Their ranges or groups are important to indicate the limits within which moderators were studied	"Numerous moderators (covariates) may influence effect sizes; these may be related to any of the key question components. [...] Where the data are discrete, sub-groups should be defined" (Stewart et al. 2013, p. 32).	0	0	1	1	1	1	1	0	0	1	1	1	1	0	1	1	0	0	1	0	0	1	0	1	0	1	1	0	1	1	1	19	31	19	31
				no	0
	Cutoff criteria	6. Effect size	In(R) (log response ratio)		2	Easily interpretable by back-transformation of ln(R) to a percentage change from the control	"The response ratio R (Hedges et al. 1999) is the ratio of the means of the two groups (e.g., experimental and control); it is useful when one wishes to compare the magnitudes of two means with the same sign. However, ratios generally have poor statistical properties so one generally transforms the ratio to a metric with more desirable properties using the natural log" (Rosenberg et al. 2013, p. …	2	0	2	2	1	2	1	1	0	1	2	2	2	0	0	2	2	1	1	1	0	2	1	2	0	1	2	0	0	2	2	37	62	37	62
			Raw mean difference (D)		1	Not recommended for meta-analyses having a range of control levels/scales. Example: when SOC stocks are studied, initial values can have a wide range (10-100 t ha-1)	"When the outcome is reported on a meaningful scale and all studies in the analysis use the same scale, the meta-analysis can be performed directly on the raw difference in means [...]. By contrast, when the measure is less well known (for example, a proprietary scale with limited distribution), the use of a raw mean difference has less to recommend it" (Borenstein et al. 2009, p. 21ff).
			Standardized mean difference (e.g., Hedges' d)		1	Difficult to interpret: |d | = 0.2 – small effects |d | = 0.5 – moderate effects |d | = 0.8 – large effects	"[...] the standardized mean difference reflects the difference between the distributions in the two groups (and how each represents a distinct cluster of scores) even if they do not measure exactly the same outcome (see Cohen 1987, Grissom and Kim 2005)" (Borenstein et al. 2009, p. 26). "Osenberg et al. (1997) and others have criticized the use of the standardized mean difference because it may …
			Non-standard metrics used or not calculated		0	Without the calculation of effect sizes, a synthesis does not qualify as a meta-analysis (all following quality criteria of group "Meta-analysis" account for 0)	"We strongly recommend that the term ‘meta-analysis’ be used only when metrics of effect size are combined across studies. In addition, we strongly encourage authors who are attempting quantitative syntheses of inadequate data sets not to use inadequate and misleading statistical methods to carry out these syntheses" (Koricheva and Gurevitch 2014, p. 840)
		7. Standard deviation extracted (or computed from statistics)		From each study	2	Standard deviations (SDs) need to be extracted (or computed from available statistics, see Acutis et al. (2022)) from all studies in order to calculate the weight for each study. If SDs were extracted only from some studies and the rest was ignored or roughly estimated by e.g., calculating the overall mean SD of the available SD, a score of "1" was assigned	"Two major cases of missing data in meta-analysis are: 1) a lack of the information required to obtain sampling variance for a portion of the dataset (for example, missing standard deviations) […]" (Nakagawa et al. 2017, p.11).	0	0	1	2	1	1	1	1	0	2	1	2	0	0	0	2	1	1	1	2	0	0	1	0	0	0	1	0	0	1	1	23	62	23	62
				From some studies	1
				Not extracted	0
		8. Studies weighted by 1/variance		For each study	4	Weighting of studies is only correct when done by the inverse of variance. Meta-analyses that extracted SD only for some studies but weighted by 1/variance did weigh "some studies" or "partly"	"A key aspect of modern approaches to meta-analysis is accounting for unequal precision in the magnitude of the effect among studies by weighting each study’s effect size by the inverse of its variance" (Koricheva and Gurevitch 2013, p. 9).	0	0	1	4	0	1	1	1	0	4	0	4	0	0	0	4	1	0	0	0	0	0	0	0	0	0	0	0	0	0	1	22	62	22	62
				For some studies	1
				Not weighted / reported	0
		9. Subgroup analysis and meta-regression		yes	1	Categorical and/or continuous moderators should be assessed by Q-test	"A categorical summary analysis is a modern meta-analysis in which the individual studies can be categorized into more than one group. [...] The between-group heterogeneity, QB, describes the variation between group cumulative effect sizes. [...] Continuous summary analyses perform a weighted linear regression analysis of effect sizes versus an independent variable. Model heterogeneity, QM, descr…	0	0	1	0	0	1	1	1	0	1	1	0	0	0	0	1	1	0	0	0	0	1	1	1	0	0	1	0	0	1	1	14	31	14	31
Meta-analysis				no	0
		10. Model used	Random-effect or mixed-effect model		1	When conducting a meta-analysis in the field of agriculture, the random-effect or mixed-effect model should be chosen, as it acknowledges between-study variation	"In ecological and evolutionary meta-analyses, although we may acknowledge that the study estimates are measuring the same overall effect, we also typically want to account for additional variation in study-specific effects that are due to different experimental conditions, locations, and so on. In this case, we do not want to explicitly characterize or model these differences, but we do want to …	0	0	1	1	1	1	1	1	0	1	1	0	1	0	0	1	1	1	1	1	0	0	0	1	0	0	0	0	0	0	1	16	31	16	31
			Fixed-effect model		0
			No model reported		0
		11. Software used for meta-analysis		Meta-analytical software (as MetaWin, Metafor package, etc.) or other software (as SPSS, SAS, Stata, R, etc.)	1	Used software should be stated; when using general statistical analysis software, correct model choice (weighted + random model) and implementation are necessary	"To conduct a meta-analysis, a researcher will need to use computer software to perform all but the simplest calculations. There are three types of software that can be used, depending upon the needs of the user. The first option is a spreadsheet, the second is a general purpose statistical package, and the third option is a program developed expressly to carry out meta- analysis. [...] In the pa…	1	0	1	1	1	1	1	1	0	1	1	1	1	0	1	1	1	1	1	1	0	1	1	1	0	0	1	1	0	1	1	24	31	24	31
				Spreadsheet (as MS Excel) or not reported	0
		12. Effect sizes are independent		1-2 effect sizes per study/site extracted	1	Effect sizes should be independent. For each study or site, one effect size should be extracted. When several combinations of treatment and control were studied, only one effect size per study or site should be extracted	"If several different measurements are made on each replicate in a study (e.g., measures at several points in time or of slightly different outcomes) and different effect sizes are computed from each, the different effect sizes may be correlated because the data on which they are based are correlated" (Gurevitch and Hedges 1999, p. 1147). "Including different studies, extracting data, estimating …	1	0	0	0	0	0	0	0	0	1	0	0	0	0	0	0	0	1	0	1	0	0	1	1	0	0	1	0	0	0	0	7	31	7	31
				> 2 effect sizes per study/site extracted	0
		13. Response variables and relevant parameters for their calculation were measured		yes	1	Response variables need to be measured in an experiment, not estimated or modelled (e.g., pedotransfer functions only provide estimates for bulk density and therefor introduce the risk of inaccurate calculation of SOC stock contents)	"[...] differences in selected PTFs [pedotransfer functions] are an important source of uncertainty in SOC storage estimation at large scales" (Xu et al. 2015, p. 1574).	0	0	1	0	0	0	0	0	0	1	1	0	0	0	0	1	0	0	1	1	0	1	1	1	0	0	0	0	0	1	1	11	31	11	31
				no	0
		14. Sensitivity analysis to test robustness of meta-analysis	Outliers and effect size distribution	yes	1	Presence of outliers should be tested and can be identified via effect size distribution in weighted histograms, box-plots, etc.	"The distribution of effect sizes in the data set being synthesized should be examined for possible outliers, as it is not unusual to find anomalously large (or small) values that can have a disproportionate and misleading effect on the analysis results" (Rothstein et al. 2013, p. 333).	0	0	0	0	1	1	0	1	0	1	1	0	0	0	0	0	1	0	0	0	0	0	0	1	0	0	1	0	0	0	0	8	31	17	62	25.8065
				no	0
			Testing for publication bias	yes	1	Magnitude of publication bias should be estimated by funnel plots, Egger's regression or Fail-safe test	"It is almost always important to include an assessment of publication bias in relation to a meta-analysis. It will either assure the reviewer that the results are robust, or alert them that the results are suspect. This is important to ensure the integrity of the individual meta-analysis" (Borenstein et al. 2009, p. 291).	0	0	1	0	0	1	1	0	0	1	1	0	0	0	0	1	1	0	0	0	0	1	0	1	0	0	0	0	0	0	0	9	31			29.0323
				no	0
Results and database presentation		15. Results presentation in figures and tables	Summarized effect size and Confidence Intervals	yes	1	Summarized effect size and confidence intervals should be presented in a table or figure	"The summary effect is nothing more than the weighted mean of the individual effects" (Borenstein et al. 2009, p. 6).	1	0	1	1	1	1	1	1	0	1	1	1	1	0	0	1	1	1	1	1	0	1	0	1	0	0	0	0	0	1	1	20	31	43	93	64.5161
				no	0
			Moderator analysis (sub-group analysis and/or meta-regression)	yes	1	Moderator (covariates) analysis should be presented in form of figures or tables	"Often […] the treatment effect will vary as a function of study-level covariates [...]. In these cases, a proper synthesis requires that the researcher be able to understand how the treatment effect varies as a function of these variables [...]" (Borenstein et al. 2009, p. xxii).	1	0	1	1	0	1	1	1	0	1	1	1	1	0	0	1	1	1	1	0	0	1	1	1	0	1	1	0	0	1	1	21	31			67.7419
				no	0
			Forest plot	yes	1	Forest plots enable the graphical presentation of individual effect sizes of studies and the overall effect size including confidence intervals	Forest plots "show effect sizes and confidence intervals from individual studies as well as group or overall mean effects and confidence intervals. [...] Forest plots are an excellent tool to communicate individual and mean effect sizes, weighting of studies, and variation or likelihood" (Lortie et al. 2013, p. 344f).	0	0	0	0	0	0	0	0	0	1	0	0	0	0	0	0	0	0	0	1	0	0	0	0	0	0	0	0	0	0	0	2	31			6.45161
				no	0
		16. Description of meta-data		yes	1	A description of meta-data (authors and year plus experimental location, treatments, etc.) in the article or appendix should to be provided as a table	"The metadata about scientific experiments are essential for finding, retrieving, and reusing the scientific data stored in online repositories. Finding relevant scientific data requires not only that the data simply be accompanied by metadata, but also that the metadata be of sufficient quality for the corresponding datasets to be discovered and reused" (Gonçalves and Musen 2019, p. 2).	1	1	0	0	1	1	0	0	1	1	1	0	1	1	0	0	1	1	1	1	1	1	1	0	1	1	0	1	1	0	1	21	31	21	31
				no	0
		17. Full database including most of the following criteria for each study	Article ID and/or first author plus year	Available and includes most of the listed criteria; Article ID and/or first author plus year must be described; either effect size or mean, SD and sample size of T/C must be described	2	Each study should have a distinctive number to allow easy identification	-	0	0	0	0	0	0	2	2	0	2	0	2	0	0	0	0	0	0	0	0	0	0	0	0	0	0	0	0	0	0	1	9	62	9	62
						First author and year of publication should be stated	-
			Country/location			Country and exact location of experiment	-
			Control (C)			Measure used as control	-
			Treatment (T)			Measure under investigation	-
			Moderators			Possible moderators (pedo-climatic, experimental conditions, duration of experiments, land use/crops/cropping systems)	"There are a number of other data entry elements that are common across extraction spread-sheets. For experimental studies, these include details of the research methods or experimental conditions that might affect the results (laboratory vs. field-based treatments, size or type of growth containers, etc.) […]" (Curtis et al. 2013 p. 53).
			Means of C/T			Means, SDs and sample sizes of treatment and control should be stated to allow replication of the meta-analysis	"This [the development of an appropriate data extraction spreadsheet] constitutes the link between each primary study and the ultimate research review and as such, informs the meta-analysis model with data for effect size estimation and associated information" (Curtis et al. 2013, p. 52).
			Standard deviations of C/T
			Sample sizes C/T
			Effect size			Calculated effect sizes should be stated
			Article ID and/or first author plus year	Available and includes the listed criteria (either effect size or mean, SD and sample size of T/C must be described)	1	see above in point 17	see above in point 17
			Means of C/T
			Standard deviations of C/T
			Sample sizes C/T
			Effect size
				Not available or includes less information than score 1	0	If no database is provided, the meta-analysis is not transparent	"A file or database with the final reconciled data should be included with the final report" (Mayo-Wilson and Grant, 2019, p. 481).
				Maximum reachable score per meta-analysis:	30
							Total score	12	4	16	18	15	17	16	14	2	29	18	21	12	5	4	21	14	10	14	10	5	14	16	16	2	7	14	6	5	15	18

## Sheet: Literature gathering
Table S3: Literature gathering
Search string: (meta-analy*) AND soil AND (agriculture OR management) AND (SOC OR OC OR "soil organic carbon" OR “organic carbon”)
	searched	results	search within	time
WOS (exported into excel)	2021-01-05	344	all fields	1900-2020
Scopus (exported into excel)	2021-01-05	208	article title, abstract, keywords	1960-2020
Total exported into Mendeley		552
After duplicates removed by Mendeley	2021-01-05	416
After duplicates removed by JabRef	2021-01-05	394
Manual deletion in JabRef	2021-01-05	385
Total of duplicates removed automatically		158
Total of duplicates removed manually		9
Exported into Excel (all duplicates removed)	2021-01-05	385
Compare results with Bolinder et al. 2020		386
	Total	386

## Sheet: Screening
Table S4: Information on screening process
Note	Final decision	Exclusion by full text	Exclusion by Abstract	Exclusion by Title	Author	Title	Year	Month	Journal	Volume	Number	Pages	Abstract
	ex			ex	Alvarez, Roberto; Gimenez, Analia; Pagnanini, Federico; Recondo, Veronica; Gangi, Daniela; Caffaro, Maria; De Paepe, Josefina L.; Berhongaray, Gonzalo	Soil acidity in the Argentine Pampas: Effects of land use and management	{2020}	{FEB}	{SOIL \& TILLAGE RESEARCH}	{196}			{Soil acidification restricts crop yield in many regions. Our objective was to estimate what effect land use has had on soil acidity in the Pampean Region of Argentina. Sampling paired sites under contrasting land uses indicated that soils under trees had lower pH and much higher levels of exchangeable and total acidity than uncultivated controls under graminaceous vegetation up to 0.75 m depth. …
	ex			ex	Chen, Guo; Liu, Shibin; Xiang, Yangzhou; Tang, Xiaolu; Liu, Haitao; Yao, Bin; Luo, Xuqiang	Impact of living mulch on soil C:N:P stoichiometry in orchards across China: A meta-analysis examining climatic, edaphic, and biotic dependency	{2020}	{APR}	{PEDOSPHERE}	{30}	{2}	{181-189}	{The use of living mulch in orchards is a widely accepted management strategy for improving soil quality and enhancing tree productivity. Although the effects of living mulch on soil organic carbon (C) and nutrients have been previously investigated, changes in the stoichiometric ratios of C, soil total nitrogen (N), and soil total phosphorous (P) under different climatic, edaphic, and biotic con…
	ex			ex	Chen, Changqing; van Groenigen, Kees Jan; Yang, Huiyi; Hungate, Bruce A.; Yang, Bing; Tian, Yunlu; Chen, Jin; Dong, Wenjun; Huang, Shan; Deng, Aixing; Jiang, Yu; Zhang, Weijian	Global warming and shifts in cropping systems together reduce China's rice production	{2020}	{MAR}	{GLOBAL FOOD SECURITY-AGRICULTURE POLICY ECONOMICS AND ENVIRONMENT}	{24}			{Climate warming is widely expected to affect rice yields, but results are equivocal and variation in rice cropping systems and climatic conditions complicates country-scale yield assessments. Here we show, through meta-analysis of field warming experiments, that yield responses to warming differ strongly between China's rice cropping systems. Whereas warming increases yields in ``single rice{''}…
forest included	ex	ex			Chen, Xinli; Chen, Han Y. H.; Chen, Chen; Ma, Zilong; Searle, Eric B.; Yu, Zaipeng; Huang, Zhiqun	Effects of plant diversity on soil carbon in diverse ecosystems: a global meta-analysis	{2020}	{FEB}	{BIOLOGICAL REVIEWS}	{95}	{1}	{167-183}	{Soil organic carbon (SOC) is a valuable resource for mediating global climate change and securing food production. Despite an alarming rate of global plant diversity loss, uncertainties concerning the effects of plant diversity on SOC remain, because plant diversity not only stimulates litter inputs via increased productivity, thus enhancing SOC, but also stimulates microbial respiration, thus r…
	ex			ex	Chen, Die; Wei, Wei; Chen, Liding	How can terracing impact on soil moisture variation in China? A meta-analysis	{2020}	{JAN 20}	{AGRICULTURAL WATER MANAGEMENT}	{227}			{Soil moisture plays a key role in vegetation restoration and ecosystem stability. Terracing modulates hydrological processes by lowering the slope gradient and shortening the slope length. The response of soil moisture variation to terracing is strongly influenced by land use, climate, topography and terracing characteristics. In this study, we conducted a meta-analysis to examine the response o…
	ex			ex	Conesa, Carlos M.; Saez, Angela; Navarro-Neila, Sara; de Lorenzo, Laura; Hunt, Arthur G.; Sepulveda, Edgar B.; Baigorri, Roberto; Garcia-Mina, Jose M.; Zamarreno, Angel M.; Sacristan, Soledad; Del Pozo, Juan C.	Alternative Polyadenylation and Salicylic Acid Modulate Root Responses to Low Nitrogen Availability	{2020}	{FEB}	{PLANTS-BASEL}	{9}	{2}		{Nitrogen (N) is probably the most important macronutrient and its scarcity limits plant growth, development and fitness. N starvation response has been largely studied by transcriptomic analyses, but little is known about the role of alternative polyadenylation (APA) in such response. In this work, we show that N starvation modifies poly(A) usage in a large number of transcripts, some of them me…
	in				Feng, Qi; An, Chunjiang; Chen, Zhi; Wang, Zheng	Can deep tillage enhance carbon sequestration in soils? A meta-analysis towards GHG mitigation and sustainable agricultural management	{2020}	{NOV}	{RENEWABLE \& SUSTAINABLE ENERGY REVIEWS}	{133}			{Sequestration of soil organic carbon (SOC) is regarded as a promising approach to offset global CO2 emissions. Deep tillage (DT) can alleviate high soil strength, influencing both the surface and subsoil carbon pools either directly or indirectly. However, field studies on the benefits of DT to SOC remain inconclusive, and comprehensive quantitative assessment has been lacking. This study used m…
	ex			ex	Gao, Han; Huang, Yimei	Impacts of the Three-North shelter forest program on the main soil nutrients in Northern Shaanxi China: A meta-analysis	{2020}	{FEB 15}	{FOREST ECOLOGY AND MANAGEMENT}	{458}			{Vegetation restoration in arid and semi-arid areas plays an extremely important role in improving the ecological environment and preventing soil erosion. The construction of the Three-North Shelter Forest (SF) in Northwestern China commenced several decades ago to increase forest productivity, improve soil fertility, and achieve better ecological benefits in arid and semi-arid zone. To date, man…
	ex			ex	Gao, B.; Wu, D. H.	THE EFFECTS OF RETURNING FARMLANDS TO FORESTS OR PASTURES ON SOIL ANIMAL DIVERSITY AND ITS REGIONAL DIFFERENTIATION CHARACTERISTICS IN CHINA: A META-ANALYSIS	{2020}		{APPLIED ECOLOGY AND ENVIRONMENTAL RESEARCH}	{18}	{5}	{6335-6353}	{A meta-analysis was conducted to investigate the effect of returning farmlands to forests or pastures on soil animal diversity and its regional differentiation characteristics in China Overall, based on the Shannon-Wiener index and Simpson index values, we found that returning farmland to forest (pasture) had an important effect on soil animal diversity. Forests and pastures might have a higher …
	ex			ex	He, Xianjin; Hou, Enqing; Veen, G. F.; Ellwood, M. D. Farnon; Dijkstra, Paul; Sui, Xinghua; Zhang, Shuang; Wen, Dazhi; Chu, Chengjin	Soil microbial biomass increases along elevational gradients in the tropics and subtropics but not elsewhere	{2020}	{FEB}	{GLOBAL ECOLOGY AND BIOGEOGRAPHY}	{29}	{2}	{345-354}	{Aim Our aim is to use elevational gradients to quantify the relationship between temperature and ecosystem functioning. Ecosystem functions such as decomposition, nutrient cycling and carbon storage are linked with the amount of microbial biomass in the soil. Previous studies have shown variable relationships between elevation and soil microbial biomass (SMB). Understanding the biological mechan…
	ex			ex	Hou, Enqing; Luo, Yiqi; Kuang, Yuanwen; Chen, Chengrong; Lu, Xiankai; Jiang, Lifen; Luo, Xianzhen; Wen, Dazhi	Global meta-analysis shows pervasive phosphorus limitation of aboveground plant production in natural terrestrial ecosystems	{2020}	{JAN 31}	{NATURE COMMUNICATIONS}	{11}	{1}		{Phosphorus (P) limitation of aboveground plant production is usually assumed to occur in tropical regions but rarely elsewhere. Here we report that such P limitation is more widespread and much stronger than previously estimated. In our global meta-analysis, almost half (46.2\%) of 652 P-addition field experiments reveal a significant P limitation on aboveground plant production. Globally, P add…
	ex			ex	Huang, Chunbo; Zeng, Yixue; Wang, Lunche; Wang, Shaoqiang	Responses of soil nutrients to vegetation restoration in China	{2020}	{JUN 30}	{REGIONAL ENVIRONMENTAL CHANGE}	{20}	{3}		{Although vegetation restoration is known to improve soil quality and increase soil microbial activity, its effects on soil nutrients remain largely uncertain because of the complex relationship between plant growth and nutrient cycling. In order to evaluate the responses of soil nutrients to vegetation restoration, we used a standardized procedure to collect 586 and 395 observations for soil tot…
	ex			ex	Jian, Siyang; Li, Jianwei; Wang, Gangsheng; Kluber, Laurel A.; Schadt, Christopher W.; Liang, Junyi; Mayes, Melanie A.	Multi-year incubation experiments boost confidence in model projections of long-term soil carbon dynamics	{2020}	{NOV 17}	{NATURE COMMUNICATIONS}	{11}	{1}		{Global soil organic carbon (SOC) stocks may decline with a warmer climate. However, model projections of changes in SOC due to climate warming depend on microbially-driven processes that are usually parameterized based on laboratory incubations. To assess how lab-scale incubation datasets inform model projections over decades, we optimized five microbially-relevant parameters in the Microbial-EN…
	ex			ex	Kumara, T. M. Kiran; Kandpal, Ankita; Pal, Suresh	A meta-analysis of economic and environmental benefits of conservation agriculture in South Asia	{2020}	{SEP 1}	{JOURNAL OF ENVIRONMENTAL MANAGEMENT}	{269}			{Agriculture plays a key role in ensuring food and livelihood security in South Asia. However, this region is vulnerable to climate change which is likely to impact the livelihoods of millions of marginal and small holders. Agriculture is not only impacted by climate change but also one of the major contributor to global warming in South Asia. As compared to the traditional practices, Conservatio…
	ex			ex	Kuo, Dave T. F.; Shih, Yang-Hsin	Meta-analysis on penconazole sorption to soils - Modeling variability of K-OC and nonlinear isotherm parameters	{2020}	{OCT 15}	{GEODERMA}	{376}			{A meta-analysis was conducted to examine the variability in log K-OC point-data (n = 612) and in the organiccarbon (OC) normalized Freundlich isotherm parameters (i.e., nf, K-f,K-OC; n = 86) of penconazole, a polar systemic triazole fungicide, in soils and biosolids-amended soils. Log K-OC was not constant and varied from 2.15 to 4.24. Five existing log K-OC models were tested against experiment…
	ex			ex	Lai, Liming; Kumar, Sandeep	A global meta-analysis of livestock grazing impacts on soil properties	{2020}	{AUG 7}	{PLOS ONE}	{15}	{8}		{Grazing effects on soil properties under different soil and environmental conditions across the globe are often controversial. Therefore, it is essential to evaluate the overall magnitude and direction of the grazing effects on soils. This global meta-analysis was conducted using the mixed model method to address the overall effects of grazing intensities (heavy, moderate, and light) on 15 soil …
	ex			ex	Li, Shucheng; Xu, Junhu; Tang, Shiming; Zhan, Qiuwen; Gao, Qinghai; Ren, Lantian; Shao, Qingqin; Chen, Lei; Du, Junli; Hao, Bing	A meta-analysis of carbon, nitrogen and phosphorus change in response to conversion of grassland to agricultural land	{2020}	{APR 1}	{GEODERMA}	{363}			{The conversion of grassland to agricultural land is an important land use change that affects soil stocks and concentrations of C, N and P, as well as their stoichiometric ratios. However, the response mechanism of soil C, N and P change to grassland conversion remains unclear. Here, we conducted a meta-analysis of 92 studies and showed that the C and N stocks mainly depended on soil depth, conv…
	ex			ex	Liao, Shu; Tan, Siyi; Peng, Yan; Wang, Dingyi; Ni, Xiangyin; Yue, Kai; Wu, Fuzhong; Yang, Yusheng	Increased microbial sequestration of soil organic carbon under nitrogen deposition over China's terrestrial ecosystems	{2020}	{SEP 29}	{ECOLOGICAL PROCESSES}	{9}	{1}		{Background China's terrestrial ecosystems have been receiving increasing amounts of reactive nitrogen (N) over recent decades. External N inputs profoundly change microbially mediated soil carbon (C) dynamics, but how elevated N affects the soil organic C that is derived from microbial residues is not fully understood. Here, we evaluated the changes in soil microbial necromass C under N addition…
	ex			ex	Lu, Xingli	A meta-analysis of the effects of crop residue return on crop yields and water use efficiency	{2020}	{APR 27}	{PLOS ONE}	{15}	{4}		{After harvesting agricultural crops, the residue can be returned to the soil as mulch. This study performed a meta-analysis of previous research to investigate the effects of crop residue return and other factors on crop yields and water use efficiency (WUE). Overall, the results show that crop residue return increases crop yields by 5.0\% relative to crops grown without it. The greatest increas…
	ex			ex	Luo, Ruyi; Luo, Jiafa; Fan, Jianling; Liu, Deyan; He, Jin-Sheng; Perveen, Nazia; Ding, Weixin	Responses of soil microbial communities and functions associated with organic carbon mineralization to nitrogen addition in a Tibetan grassland	{2020}	{APR}	{PEDOSPHERE}	{30}	{2}	{214-225}	{Alpine grasslands with a high soil organic carbon (SOC) storage on the Tibetan Plateau are experiencing rapid climate warming and anthropogenic nitrogen (N) deposition; this is expected to substantially increase the soil N availability, which may impact carbon (C) cycling. However, little is known regarding how N enrichment influences soil microbial communities and functions relative to C cyclin…
	ex			ex	Malacrino, Antonino; Sadowski, Victoria A.; Martin, Tvisha K.; de Oliveira, Nathalia Cavichiolli; Brackett, Ian J.; Feller, James D.; Harris, Kristian J.; Heredia, Orlando Combita; Vescio, Rosa; Bennett, Alison E.	Biological invasions alter environmental microbiomes: A meta-analysis	{2020}	{OCT 22}	{PLOS ONE}	{15}	{10}		{Biological invasions impact both agricultural and natural systems. The damage can be quantified in terms of both economic loss and reduction of biodiversity. Although the literature is quite rich about the impact of invasive species on plant and animal communities, their impact on environmental microbiomes is underexplored. Here, we re-analyze publicly available data using a common framework to …
	in				Mathew, Isack; Shimelis, Hussein; Mutema, Macdex; Minasny, Budiman; Chaplot, Vincent	Crops for increasing soil organic carbon stocks - A global meta analysis	{2020}	{MAY 15}	{GEODERMA}	{367}			{Quantifying the ability of plants to store atmospheric inorganic carbon (C) in their biomass and ultimately in the soil as organic C for long duration is crucial for climate change mitigation and soil fertility improvement. While many independent studies have been performed on the transfer of atmospheric C to soils for single crop types, the objective of this study was to compare the ability of …
	ex	ex			Morugan-Coronado, Alicia; Linares, Carlos; Dolores Gomez-Lopez, Maria; Faz, Angel; Zornoza, Raul	The impact of intercropping, tillage and fertilizer type on soil and crop yield in fruit orchards under Mediterranean conditions: A meta-analysis of field studies	{2020}	{FEB}	{AGRICULTURAL SYSTEMS}	{178}			{A meta-analysis specially based on tree crops was conducted to evaluate the changes in soil organic carbon (SOC), soil N and P, and crop yield in a Mediterranean climate, which are affected by: (i) management practices (crop diversification, tillage, fertilization); (ii) environmental characteristics, such as soil clay and climatic variables; and (iii) study length. The aim of this study was to …
	ex			ex	Nunes, Marcio R.; van Es, Harold M.; Veum, Kristen S.; Amsili, Joseph P.; Karlen, Douglas L.	Anthropogenic and Inherent Effects on Soil Organic Carbon across the U.S	{2020}	{JUL}	{SUSTAINABILITY}	{12}	{14}		{Soil organic carbon (SOC) influences several soil functions, making it one of the most important soil health indicators. Its quantity is determined by anthropogenic and inherent factors that must be understood to improve SOC management and interpretation. Topsoil (<= 15 cm) SOC response to tillage depth and intensity, cover crops, stover removal, manure addition, and various cropping systems was…
	ex			ex	Padbhushan, Rajeev; Sharma, Sheetal; Rana, D. S.; Kumar, Upendra; Kohli, Anshuman; Kumar, Rajkishore	Delineate Soil Characteristics and Carbon Pools in Grassland Compared to Native Forestland of India: A Meta-Analysis	{2020}	{DEC}	{AGRONOMY-BASEL}	{10}	{12}		{Grassland is a highly dynamic land use system and it provides vital ecosystem services, mainly consisting of carbon storage in the tropics and subtropics. The objective of this study was to delineate grassland in India according to soil characteristics and carbon pools in comparison to native forestland, and to discuss management strategies for improving soil carbon (SC) storage in grassland. A …
	ex			ex	Pokharel, Prem; Ma, Zilong; Chang, Scott X.	Biochar increases soil microbial biomass with changes in extra- and intracellular enzyme activities: a global meta-analysis	{2020}	{MAR}	{BIOCHAR}	{2}	{1}	{65-79}	{Biochar application to soil has been proposed as a potential management strategy to enhance soil carbon (C) sequestration, reduce greenhouse gas emission, improve soil quality, and increase crop productivity. The effects of biochar on soil microbial and enzyme activities are integrally linked to the potential of biochar in achieving these benefits. We conducted a global meta-analysis to assess t…
	ex			ex	Razzaghi, Fatemeh; Obour, Peter Bilson; Arthur, Emmanuel	Does biochar improve soil water retention? A systematic review and meta-analysis	{2020}	{MAR 1}	{GEODERMA}	{361}			{Biochar is widely suggested as a soil amendment to improve soil physical properties for crop production. However, the heterogeneity between experiments in terms of biochar characteristics, experimental conditions and soil properties makes it difficult to compare and extrapolate results from different studies. We conducted a statistical meta-analysis of literature published between 2010 and 2019,…
	ex			ex	Teng, Yanmin; Zhan, Jinyan; Agyemang, Frank Boappeah; Sun, Yongxiu	The effects of degradation on alpine grassland resilience: A study based on meta-analysis data	{2020}	{DEC}	{GLOBAL ECOLOGY AND CONSERVATION}	{24}			{Alpine grasslands on the Qinghai-Tibet Plateau (QTP) provide irreplaceable ecosystem services to local and global communities. However, intensive human activities have caused severe grassland degradation during recent decades. Due to the harsh environment, these degraded grasslands recover slowly or may be irrecoverable after they degenerate to a certain stage. To understand the changes in the r…
	ex			ex	Viglizzo, E. F.; Taboada, M. A.; Vazquez-Amabile, G.; Ricard, M. F.	Response to the Letter to the Editor ``The role of South American grazing lands in mitigating greenhouse gas emissions. A reply to: `Reassessing the role of grazing lands in carbon-balance estimations: Meta-analysis and review' by Viglizzo et al. (2019).''	{2020}	{OCT 20}	{SCIENCE OF THE TOTAL ENVIRONMENT}	{740}
	ex			ex	Wang, Chao; Tang, Yujia; Li, Xiaona; Zhang, Weiwei; Zhao, Chunqiao; Li, Cui	Negative impacts of plant diversity loss on carbon sequestration exacerbate over time in grasslands	{2020}	{OCT}	{ENVIRONMENTAL RESEARCH LETTERS}	{15}	{10}		{Positive relationships between plant species diversity and carbon attributes have been observed in grasslands, but synthesis studies of how plant diversity affects the carbon balance of grasslands and how the response ratio changes over time both remain limited. By conducting a global meta-analysis with 811 paired observations of plant mixtures and monocultures from 83 studies in natural and man…
	ex			ex	Wang, Dangjun; Zhou, Huakun; Yao, Buqing; Wang, Wenying; Dong, Shikui; Shang, Zhanhuan; She, Yandi; Ma, Li; Huang, Xiaotao; Zhang, Zhonghua; Zhang, Qian; Zhao, Fengyu; Zuo, Juan; Mao, Zhun	Effects of nutrient addition on degraded alpine grasslands of the Qinghai-Tibetan Plateau: A meta-analysis	{2020}	{OCT 1}	{AGRICULTURE ECOSYSTEMS \& ENVIRONMENT}	{301}			{Climate warming and human disturbance are supposed to have severely affected the alpine grasslands on the Qinghai-Tibetan Plateau (QTP), a region where the extremely harsh and fragile ecological environment has attracted great attention because of its sensitivity to global change. However, there is still no unified understanding of the degree and magnitude of grassland degradation and the effect…
	ex			ex	Wang, Naijiang; Ding, Dianyuan; Malone, Robert W.; Chen, Haixin; Wei, Yongsheng; Zhang, Tibin; Luo, Xiaoqi; Li, Cheng; Chu, Xiaosheng; Feng, Hao	When does plastic-film mulching yield more for dryland maize in the Loess Plateau of China? A meta-analysis	{2020}	{OCT 1}	{AGRICULTURAL WATER MANAGEMENT}	{240}			{Plastic-film mulching (PM) has been widely adopted for dryland maize (Zea mays L.) in the Loess Plateau of China, whereas its impact on grain yield (GY) varies considerably. Therefore, it is crucial to make some feasible strategies that aim to improve the productivity of PM systems. Using the data obtained from peer-reviewed publications, we conducted a meta-analysis to (1) analyze the climate r…
	ex			ex	Wang, Xudong; He, Cong; Liu, Bingyang; Zhao, Xin; Liu, Yang; Wang, Qi; Zhang, Hailin	Effects of Residue Returning on Soil Organic Carbon Storage and Sequestration Rate in China's Croplands: A Meta-Analysis	{2020}	{MAY}	{AGRONOMY-BASEL}	{10}	{5}		{Crop residue returning (RR) is a promising option to increase soil organic carbon (SOC) storage, which is linked to crop yield promotion, ecologically sustainable agriculture, and climate change mitigation. Thus, the objectives of this study were to identify the responses of SOC storage and sequestration rates to RR in China's croplands. Based on a national meta-analysis of 365 comparisons from …
	ex			ex	Wei, Zhibiao; Ying, Hao; Guo, Xiaowei; Zhuang, Minghao; Cui, Zhenling; Zhang, Fusuo	Substitution of Mineral Fertilizer with Organic Fertilizer in Maize Systems: A Meta-Analysis of Reduced Nitrogen and Carbon Emissions	{2020}	{AUG}	{AGRONOMY-BASEL}	{10}	{8}		{Organic fertilizer is an effective substitute for mineral fertilizer that improves crop yield and is environmentally friendly. However, the effects of substitution often vary due to complicated interactions among the organic fertilizer substitution rate (Rs), total nutrient supply, and type of cropping system used. We performed a meta-analysis of 133 maize studies, conducted worldwide, to assess…
	ex			ex	Zhang, Xinmu; Guo, Jingheng; Vogt, Rolf David; Mulder, Jan; Wang, Yajing; Qian, Cheng; Wang, Jingguo; Zhang, Xiaoshan	Soil acidification as an additional driver to organic carbon accumulation in major Chinese croplands	{2020}	{MAY 1}	{GEODERMA}	{366}			{Significant increase in soil organic carbon (SOC) has been found in Chinese croplands. Current literature largely attributes this to the increased organic C inputs from manure, crop straw and root. However, using a meta-analysis of 185 long-term trials and 6669 spatial data pairs across China, we show here that soil acidification is an additional significant cause for the SOC accumulation. Resul…
	ex			ex	Zhang, Qi; Xiao, Jing; Xue, Jianhui; Zhang, Lang	Quantifying the Effects of Biochar Application on Greenhouse Gas Emissions from Agricultural Soils: A Global Meta-Analysis	{2020}	{APR}	{SUSTAINABILITY}	{12}	{8}		{Agricultural disturbance has significantly boosted soil greenhouse gas (GHG) emissions such as methane (CH4), carbon dioxide (CO2), and nitrous oxide (N2O). Biochar application is a potential option for regulating soil GHG emissions. However, the effects of biochar application on soil GHG emissions are variable among different environmental conditions. In this study, a dataset based on 129 publi…
	ex			ex	Zhou, Zhenghu; Wang, Chuankuan; Luo, Yiqi	Meta-analysis of the impacts of global change factors on soil microbial diversity and functionality	{2020}	{JUN 17}	{NATURE COMMUNICATIONS}	{11}	{1}		{Biodiversity on the Earth is changing at an unprecedented rate due to a variety of global change factors (GCFs). However, the effects of GCFs on microbial diversity is unclear despite that soil microorganisms play a critical role in biogeochemical cycling. Here, we synthesize 1235 GCF observations worldwide and show that microbial rare species are more sensitive to GCFs than common species, whil…
	ex			ex	Zhu, Shuhao; Liu, Liyuan; Xu, Yan; Yang, Yanying; Shi, Rongguang	Application of controlled release urea improved grain yield and nitrogen use efficiency: A meta-analysis	{2020}	{OCT 29}	{PLOS ONE}	{15}	{10}		{The application of controlled release urea (CRU) has been proposed as a crucial method to reduce the adverse environmental effects induced by conventional urea (CU). Yet, a systematic and quantitative analysis on how CRU affects staple crop production including wheat (Triticum aestivum L.), maize (Zea mays L.), and rice (Oryza sativa L.) is lacking. Here, a meta-analysis was conducted to determi…
	ex		ex		Zou, Junliang; Li, Qianyu; Osborne, Bruce; Luo, Yiqi	Dominant role of nitrogen stoichiometric flexibility in ecosystem carbon storage under elevated CO2	{2020}	{DEC 10}	{SCIENCE OF THE TOTAL ENVIRONMENT}	{747}			{Interactions between the carbon (C) and nitrogen (N) cycles can impact on the sensitivity of terrestrial C storage to elevated atmospheric carbon dioxide (CO2) concentrations (eCO(2)). However, the underlying mechanisms associated with C-N interactions that influence terrestrial ecosystemC sequestration (C-seq) remains unclear. Here, we quantitatively analyzed published C and N responses to expe…
	ex			ex	An, Hui; Wu, Xiuzhi; Zhang, Yarou; Tang, Zhuangsheng	Effects of land-use change on soil inorganic carbon: A meta-analysis	{2019}	{NOV 1}	{GEODERMA}	{353}		{273-282}	{Understanding the changes in soil inorganic carbon (SIC) resulting from land-use change is vital for evaluating terrestrial soil C stocks and predicting global change. However, a comprehensive and quantitative understanding of the impacts of land-use change (LUC) on SIC is lacking. We conducted a meta-analysis to assess the effects of land-use change on SIC based on 576 data points obtained from…
	in				Bai, Xiongxiong; Huang, Yawen; Ren, Wei; Coyne, Mark; Jacinthe, Pierre-Andre; Tao, Bo; Hui, Dafeng; Yang, Jian; Matocha, Chris	Responses of soil carbon sequestration to climate-smart agriculture practices: A meta-analysis	{2019}	{AUG}	{GLOBAL CHANGE BIOLOGY}	{25}	{8}	{2591-2606}	{Climate-smart agriculture (CSA) management practices (e.g., conservation tillage, cover crops, and biochar applications) have been widely adopted to enhance soil organic carbon (SOC) sequestration and to reduce greenhouse gas emissions while ensuring crop productivity. However, current measurements regarding the influences of CSA management practices on SOC sequestration diverge widely, making i…
	ex			ex	Borchard, Nils; Schirrmann, Michael; Luz Cayuela, Maria; Kammann, Claudia; Wrage-Moennig, Nicole; Estavillo, Jose M.; Fuertes-Mendizabal, Teresa; Sigua, Gilbert; Spokas, Kurt; Ippolito, James A.; Novak, Jeff	Biochar, soil and land-use interactions that reduce nitrate leaching and N2O emissions: A meta-analysis	{2019}	{FEB 15}	{SCIENCE OF THE TOTAL ENVIRONMENT}	{651}	{2}	{2354-2364}	{Biochar can reduce both nitrous oxide (N2O) emissions and nitrate (NO3-) leaching, but refining biochar's use for estimating these types of losses remains elusive. For example, biochar properties such as ash content and labile organic compounds may induce transient effects that alter N-based losses. Thus, the aim of this meta-analysis was to assess interactions between biochar-induced effects on…
	ex			ex	Clark, Christopher M.; Richkus, Jennifer; Jones, Phillip W.; Phelan, Jennifer; Burns, Douglas A.; de Vries, Wim; Du, Enzai; Fenn, Mark E.; Jones, Laurence; Watmough, Shaun A.	A synthesis of ecosystem management strategies for forests in the face of chronic nitrogen deposition	{2019}	{MAY}	{ENVIRONMENTAL POLLUTION}	{248}		{1046-1058}	{Total nitrogen (N) deposition has declined in many parts of the U.S. and Europe since the 1990s. Even so, it appears that decreased N deposition alone may be insufficient to induce recovery from the impacts of decades of elevated deposition, suggesting that management interventions may be necessary to promote recovery. Here we review the effectiveness of four remediation approaches (prescribed b…
	ex			ex	Daryanto, Stefani; Fu, Bojie; Zhao, Wenwu; Wang, Lixin	One-hundred years after shrub encroachment: Policy directions towards sustainable rangeland-use	{2019}	{MAY}	{LAND USE POLICY}	{84}		{71-78}	{In many shrub-encroached lands, livestock grazing is the dominant land-use type which shapes stakeholders' perspective on single ecosystem service provision (i.e., forage production). Although recent ecological studies suggested otherwise, recognition of multiple ecosystem services from shrublands is rarely translated into policy, likely due to the lack of robust scientific evidence on trade-off…
	ex			ex	Deng, Lei; Kim, Dong-Gill; Li, Miaoyu; Huang, Chunbo; Liu, Qiuyu; Cheng, Min; Shangguan, Zhouping; Peng, Changhui	Land-use changes driven by `Grain for Green' program reduced carbon loss induced by soil erosion on the Loess Plateau of China	{2019}	{JUN}	{GLOBAL AND PLANETARY CHANGE}	{177}		{101-115}	{Vegetation restoration on degraded lands has been encouraged worldwide due to its ecological services and function of controlling soil erosion and improving carbon (C) stocks in terrestrial ecosystems. Although the processes of runoff and sediment detachment and transport are well recognized, the effects of vegetation restoration on organic C loss through soil erosion are not fully understood wi…
	ex			ex	Diekmann, Martin; Andres, Christian; Becker, Thomas; Bennie, Jonathan; Blueml, Volker; Bullock, James M.; Culmsee, Heike; Fanigliulo, Miriam; Hahn, Annett; Heinken, Thilo; Leuschner, Christoph; Luka, Stefanie; Meissner, Justus; Mueller, Josef; Newton, Adrian; Peppler-Lisbach, Cord; Rosenthal, Gert; van den Berg, Leon J. L.; Vergeer, Philippine; Wesche, Karsten	Patterns of long-term vegetation change vary between different types of semi-natural grasslands in Western and Central Europe	{2019}	{MAR}	{JOURNAL OF VEGETATION SCIENCE}	{30}	{2}	{187-202}	{Questions Has plant species richness in semi-natural grasslands changed over recent decades? Do the temporal trends of habitat specialists differ from those of habitat generalists? Has there been a homogenization of the grassland vegetation? Location Different regions in Germany and the UK. Methods We conducted a formal meta-analysis of re-survey vegetation studies of semi-natural grasslands. In…
	ex			ex	Dove, Nicholas C.; Stark, John M.; Newman, Gregory S.; Hart, Stephen C.	Carbon control on terrestrial ecosystem function across contrasting site productivities: the carbon connection revisited	{2019}	{JUL}	{ECOLOGY}	{100}	{7}		{Understanding how altered soil organic carbon (SOC) availability affects microbial communities and their function is imperative in predicting impacts of global change on soil carbon (C) storage and ecosystem function. However, the response of soil microbial communities and their function to depleted C availability in situ is unclear. We evaluated the role of soil C inputs in controlling microbia…
	ex			ex	Gonzalez-Sanchez, Emilio J.; Veroz-Gonzalez, Oscar; Conway, Gordon; Moreno-Garcia, Manuel; Kassam, Amir; Mkomwag, Saidi; Ordonez-Fernandez, Rafaela; Trivino-Tarradas, Paula; Carbonell-Bojollo, Rosa	Meta-analysis on carbon sequestration through Conservation Agriculture in Africa	{2019}	{JUL}	{SOIL \& TILLAGE RESEARCH}	{190}		{22-30}	{Africa is the smallest contributor to global greenhouse gas emissions among the continents, but the most vulnerable to the impacts of climate change. The effects will not be limited to a rising average temperature and changing rainfall patterns, but also to increasing severity and frequency in droughts, heat stress and floods. Agriculture is not only impacted upon by climate change but also cont…
	ex			ex	Gotosa, Jephita; Kodzwa, Jefline; Nyamangara, Justice; Gwenzi, Willis	Effect of Nitrogen Fertiliser Application on Maize Yield Across Agro-Ecological Regions and Soil Types in Zimbabwe: A Meta-analysis Approach	{2019}	{SEP}	{INTERNATIONAL JOURNAL OF PLANT PRODUCTION}	{13}	{3}	{251-266}	{Accurate nitrogen (N) fertilisation increases crop yields and minimises environmental pollution in maize based production systems. In this study we report on a meta-analysis of the effects of N fertilisation on maize yield using observations from 53 studies conducted in Zimbabwe since the 1950s for possible refinement of fertiliser recommendations. We assessed the response of maize to: < 30; 30-…
	ex			ex	Hannam, K. D.; Fleming, R. L.; Venier, L.; Hazlett, P. W.	Can Bioenergy Ash Applications Emulate the Effects of Wildfire on Upland Forest Soil Chemical Properties?	{2019}	{AUG}	{SOIL SCIENCE SOCIETY OF AMERICA JOURNAL}	{83}	{1}	{S201-S217}	{As efforts to combat climate change intensify in Canada and around the world, the use of forest biomass to produce energy is expanding rapidly. At the same time, there is an urgent need for environmentally sustainable methods of handling the ash generated during biomass combustion. Currently, bioenergy ash is often landfilled, placing significant pressure on Canada's waste disposal infrastructur…
	ex			ex	Jiang, Yu; Carrijo, Daniela; Huang, Shan; Chen, Ji; Balaine, Nimlesh; Zhang, Weijian; van Groenigen, Kees Jan; Linquist, Bruce	Water management to mitigate the global warming potential of rice systems: A global meta-analysis	{2019}	{MAR 15}	{FIELD CROPS RESEARCH}	{234}		{47-54}	{Rice is a main staple food for roughly half of the world's population, but rice agriculture is also a main source of anthropogenic greenhouse gas (GHG) emissions. Many studies have reported that water management (e.g. alternate wetting and drying, intermittent irrigation, mid-season drain, aerobic rice) affects rice yields and methane (CH4) and nitrous oxide (N2O) emissions from rice paddies. Ho…
	ex			ex	Jiang, Yu; Qian, Haoyu; Wang, Ling; Feng, Jinfei; Huang, Shan; Hungate, Bruce A.; van Kessel, Chris; Horwath, William R.; Zhang, Xingyue; Qin, Xiaobo; Li, Yue; Feng, Xiaomin; Zhang, Jun; Deng, Aixing; Zheng, Chenyan; Song, Zhenwei; Hu, Shuijin; van Groenigen, Kees Jan; Zhang, Weijian	Limited potential of harvest index improvement to reduce methane emissions from rice paddies	{2019}	{FEB}	{GLOBAL CHANGE BIOLOGY}	{25}	{2}	{686-698}	{Rice is a staple food for nearly half of the world's population, but rice paddies constitute a major source of anthropogenic CH4 emissions. Root exudates from growing rice plants are an important substrate for methane-producing microorganisms. Therefore, breeding efforts optimizing rice plant photosynthate allocation to grains, i.e., increasing harvest index (HI), are widely expected to reduce C…
	ex			ex	Li, Mengfan; Wang, Jing; Guo, Ding; Yang, Ruirui; Fu, Hua	Effect of land management practices on the concentration of dissolved organic matter in soil: A meta-analysis	{2019}	{JUN 15}	{GEODERMA}	{344}		{74-81}	{Dissolved organic carbon (DOC) and dissolved organic nitrogen (DON) are important components of dissolved organic matter (DOM) in soil. A change in the concentration of soil DOM leads to changes in the soil carbon (C) and nitrogen (N) pools and the emergence of potential pollution. Many studies have reported that the concentrations of soil DOM could be significantly influenced by land management…
	ex			ex	Liu, Peng; He, Jin; Li, Hongwen; Wang, Qingjie; Lu, Caiyun; Zheng, Kan; Liu, Wenzheng; Zhao, Hongbo; Lou, Shangyi	Effect of Straw Retention on Crop Yield, Soil Properties, Water Use Efficiency and Greenhouse Gas Emission in China: A Meta-Analysis	{2019}	{DEC}	{INTERNATIONAL JOURNAL OF PLANT PRODUCTION}	{13}	{4}	{347-367}	{Crop straw retention to field (CSRF) is a technology to impact the crop yield, soil properties and greenhouse gas (GHG) emission and plays a critical role in sustainable agriculture system. Based on the literatures published, a meta-analysis was performed to evaluate actual impact of CSRF on crop yield, soil properties and GHG emission compared with straw no-retention (NSR). The results indicate…
	ex			ex	Livsey, John; Katterer, Thomas; Vico, Giulia; Lyon, Steve W.; Lindborg, Regina; Scaini, Anna; Da, Chau Thi; Manzoni, Stefano	Do alternative irrigation strategies for rice cultivation decrease water footprints at the cost of long-term soil health?	{2019}	{JUL}	{ENVIRONMENTAL RESEARCH LETTERS}	{14}	{7}		{The availability of water is a growing concern for flooded rice production. As such, several water-saving irrigation practices have been developed to reduce water requirements. Alternate wetting and drying and mid-season drainage have been shown to potentially reduce water requirements while maintaining rice yields when compared to continuous flooding. With the removal of permanently anaerobic c…
	ex			ex	Luo, Gongwen; Sun, Bo; Li, Ling; Li, Minghui; Liu, Manqiang; Zhu, Yiyong; Guo, Shiwei; Ling, Ning; Shen, Qirong	Understanding how long-term organic amendments increase soil phosphatase activities: Insight into phoD- and phoC-harboring functional microbial populations	{2019}	{DEC}	{SOIL BIOLOGY \& BIOCHEMISTRY}	{139}			{In context of the use of organic materials as alternatives for mineral fertilizer, it is important to understand how organic amendments influence soil extracellular phosphatase activities which accelerate the mineralization of organic phosphorus (P). To address this, the current study investigates the influence of organic amendments on acid (ACP) and alkaline (ALP) phosphatase activities in soil…
	ex			ex	Mao, Zhun; Derrien, Delphine; Didion, Markus; Liski, Jari; Eglin, Thomas; Nicolas, Manuel; Jonard, Mathieu; Saint-Andre, Laurent	Modeling soil organic carbon dynamics in temperate forests with Yasso07	{2019}	{MAY 13}	{BIOGEOSCIENCES}	{16}	{9}	{1955-1973}	{In a context of global changes, modeling and predicting the dynamics of soil carbon stocks (CSs) in forest ecosystems are vital but challenging. Yasso07 is considered to be one of the most promising models for such a purpose. We examine the accuracy of its prediction of soil carbon dynamics over the whole French metropolitan territory at a decennial timescale. We used data from 101 sites in the …
	ex			ex	Moffet, Corey A.; Hardegree, Stuart P.; Abatzoglou, John T.; Hegewisch, Katherine C.; Reuter, R. Ryan; Sheley, Roger L.; Brunson, M. W.; Flerchinger, G. N.; Boehm, Alex R.	Weather Tools for Retrospective Assessment of Restoration Outcomes	{2019}	{FEB}	{RANGELAND ECOLOGY \& MANAGEMENT}	{72}	{2}	{225-229}	{Rangeland seeding practices in the Intermountain western United States are predominantly implemented in the year immediately following wildfire for the purposes of Emergency Stabilization and Rehabilitation (ESR). This necessarily links restoration and rehabilitation outcomes to the probability of a single year providing sufficiently favorable microclimatic conditions for desirable plant establi…
	ex			ex	Qi, Guangping; Kang, Yanxia; Yin, Minhua; Ma, Yanlin; Bai, Youshuai; Wang, Jinheng	Yield Responses of Wheat to Crop Residue Returning in China: A Meta-Analysis	{2019}	{SEP-OCT}	{CROP SCIENCE}	{59}	{5}	{2185-2200}	{Crop residue returning (CRR) is known to improve the soil environment and thus increase crop production. However, the impacts of CRR on wheat (Triticum aestivum L.) yield have been contrary at times due to the differences in climatic conditions, soil traits, and management practices. These effects were evaluated using 351 paired observations published in 161 papers comprising studies conducted i…
	ex			ex	Ren, Fengling; Sun, Nan; Xu, Meng; Zhang, Xubo; Wu, Lianhai; Xu, Minggang	Changes in soil microbial biomass with manure application in cropping systems: A meta-analysis	{2019}	{NOV}	{SOIL \& TILLAGE RESEARCH}	{194}			{Soil microbial biomass carbon (SMBC) and nitrogen (SMBN) are important indices of soil bio-fertility. While intensively managed cropping systems can reduce microbial biomass, application of manure is a potential way to rebuilt microbial biomass and improve soil functions. However, the responses of SMBC and SMBN to manure application relative to mineral fertilizers (NPK) in Chinese cropping syste…
	ex		ex		Song, Jian; Wan, Shiqiang; Piao, Shilong; Knapp, Alan K.; Classen, Aimee T.; Vicca, Sara; Ciais, Philippe; Hovenden, Mark J.; Leuzinger, Sebastian; Beier, Claus; Kardol, Paul; Xia, Jianyang; Liu, Qiang; Ru, Jingyi; Zhou, Zhenxing; Luo, Yiqi; Guo, Dali; Langley, J. Adam; Zscheischler, Jakob; Dukes, Jeffrey S.; Tang, Jianwu; Chen, Jiquan; Hofmockel, Kirsten S.; Kueppers, Lara M.; Rustad, Lindsey; L…	A meta-analysis of 1,119 manipulative experiments on terrestrial carbon-cycling responses to global change	{2019}	{SEP}	{NATURE ECOLOGY \& EVOLUTION}	{3}	{9}	{1309-1320}	{Direct quantification of terrestrial biosphere responses to global change is crucial for projections of future climate change in Earth system models. Here, we synthesized ecosystem carbon-cycling data from 1,119 experiments performed over the past four decades concerning changes in temperature, precipitation, CO2 and nitrogen across major terrestrial vegetation types of the world. Most experimen…
	ex		ex		Sun, Zhaolin; Liu, Shengen; Zhang, Tianan; Zhao, Xuechao; Chen, Shi; Wang, Qingkui	Priming of soil organic carbon decomposition induced by exogenous organic carbon input: a meta-analysis	{2019}	{OCT}	{PLANT AND SOIL}	{443}	{1-2}	{463-471}	{Background and aims Priming effect (PE) of soil organic carbon (SOC) decomposition induced by exogenous organic C is an important ecological process in regulating the soil C cycle. The objective of this study was to evaluate how the PE varied among different ecosystems at the global scale and explore factors that drive the direction and magnitude of the PE. Methods Using 2048 experimental compar…
	ex			ex	Wu, Zhen; Zhang, Xi; Dong, Yubing; Li, Bo; Xiong, Zhengqin	Biochar amendment reduced greenhouse gas intensities in the rice-wheat rotation system: six-year field observation and meta-analysis	{2019}	{NOV 15}	{AGRICULTURAL AND FOREST METEOROLOGY}	{278}			{Biochar amendment to cropland has been recommended as a potential strategy to mitigate climate change. However, estimations of the long-term greenhouse gas (GHG) emissions, namely, the methane (CH4) and nitrous oxide (N2O) mitigation potential, from agricultural systems are limited. Here, a six-year field experiment was conducted to simultaneously monitor the CH4 and N2O emissions and the yield …
	ex			ex	Xu, Le; Li, Xiaoxiao; Wang, Xinyu; Xiong, Dongliang; Wang, Fei	Comparing the Grain Yields of Direct-Seeded and Transplanted Rice: A Meta-Analysis	{2019}	{NOV}	{AGRONOMY-BASEL}	{9}	{11}		{Conventional transplanted rice (TPR) has been increasingly replaced by direct-seeded rice (DSR) because of its low water and labour requirements. Whether and how DSR can be as productive as TPR has received widespread attention. Here, a comprehensive meta-analysis was performed to quantify the effects of direct seeding on rice yield and identify the management and environmental factors that cont…
	ex			ex	Xu, Shangqi; Liu, Xia; Li, Xiujun; Tian, Chunjie	Soil organic carbon changes following wetland restoration: A global meta-analysis	{2019}	{NOV 1}	{GEODERMA}	{353}		{89-96}	{Wetland restoration has been conducted worldwide due to the important ecological functions provided by wetlands. However, the global patterns of soil organic carbon (SOC) change following wetland restoration are not clear, which has limited the efficacy of the management of restored wetlands. In this study, we synthesized the results from 41 studies and carried out a meta-analysis to examine the…
	in				Xu, Hui; Sieverding, Heidi; Kwon, Hoyoung; Clay, David; Stewart, Catherine; Johnson, Jane M. F.; Qin, Zhangcai; Karlen, Douglas L.; Wang, Michael	A global meta-analysis of soil organic carbon response to corn stover removal	{2019}	{OCT}	{GLOBAL CHANGE BIOLOGY BIOENERGY}	{11}	{10}	{1215-1233}	{Corn (Zea mays L.) stover is a global resource used for livestock, fuel, and bioenergy feedstock, but excessive stover removal can decrease soil organic C (SOC) stocks and deteriorate soil health. Many site-specific stover removal experiments report accrual rates and SOC stock effects, but a quantitative, global synthesis is needed to provide a scientific base for long-term energy policy decisio…
	ex			ex	Zhang, Wushuai; Liang, Zhengyuan; He, Xiaoming; Wang, Xiaozhong; Shi, Xiaojun; Zou, Chunqin; Chen, Xinping	The effects of controlled release urea on maize productivity and reactive nitrogen losses: A meta-analysis	{2019}	{MAR}	{ENVIRONMENTAL POLLUTION}	{246}		{559-565}	{Application of controlled release urea (CRU) is recommended to reduce the undesirable environmental effects resulting from urea application. However, the overall effects of CRU on maize productivity and reactive nitrogen (N) losses remain unclear. Our global meta-analysis based on 866 observations of 120 studies indicated that application of CRU instead of urea (same N rate) increased maize yiel…
	ex			ex	Zheng, Mianhai; Zhou, Zhenghu; Luo, Yiqi; Zhao, Ping; Mo, Jiangming	Global pattern and controls of biological nitrogen fixation under nutrient enrichment: A meta-analysis	{2019}	{SEP}	{GLOBAL CHANGE BIOLOGY}	{25}	{9}	{3018-3030}	{Biological nitrogen (N) fixation (BNF), an important source of N in terrestrial ecosystems, plays a critical role in terrestrial nutrient cycling and net primary productivity. Currently, large uncertainty exists regarding how nutrient availability regulates terrestrial BNF and the drivers responsible for this process. We conducted a global meta-analysis of terrestrial BNF in response to N, phosp…
	ex			ex	Aliyu, Garba; Sanz-Cobena, Alberto; Mueller, Christoph; Zaman, Mohammad; Luo, Jiafa; Liu, Deyan; Yuan, Junji; Chen, Zengming; Niu, Yuhui; Arowolo, Aisha; Ding, Weixin	A meta-analysis of soil background N2O emissions from croplands in China shows variation among climatic zones	{2018}	{NOV 15}	{AGRICULTURE ECOSYSTEMS \& ENVIRONMENT}	{267}		{63-73}	{Nitrous oxide (N2O) is one of the most important and persistent greenhouse gases, however, there is a lack of accurate data on soil background N2O emissions (BNE) from agricultural land. Calculations of N2O emission factors from land uses are currently based on a single, universal BNE value advocated by the International Panel on Climate Change, but BNE are thought to vary with climate and soil …
	ex			ex	Balesdent, Jerome; Basile-Doelsch, Isabelle; Chadoeuf, Joel; Cornu, Sophie; Derrien, Delphine; Fekiacova, Zuzana; Hatte, Christine	Atmosphere-soil carbon transfer as a function of soil depth	{2018}	{JUL 26}	{NATURE}	{559}	{7715}	{599+}	{The exchange of carbon between soil organic carbon (SOC) and the atmosphere affects the climate(1,2) and-because of the importance of organic matter to soil fertility-agricultural productivity(3). The dynamics of topsoil carbon has been relatively well quantified(4), but half of the soil carbon is located in deeper soil layers (below 30 centimetres)(5-7), and many questions remain regarding the …
	ex			ex	Chatterjee, Nilovna; Nair, P. K. Ramachandran; Chakraborty, Saptarshi; Nair, Vimala D.	Changes in soil carbon stocks across the Forest-Agroforest-Agriculture/Pasture continuum in various agroecological regions: A meta-analysis	{2018}	{NOV 1}	{AGRICULTURE ECOSYSTEMS \& ENVIRONMENT}	{266}		{55-67}	{The contribution of agroforestry systems (AFS) to enhance soil organic carbon (SOC) storage in soil layers due to the presence of deep tree roots are of interest in the context of promoting carbon sinks and greenhouse gas mitigation. To quantify the relative soil C contribution from trees in agroforestry systems (AFS), this study assessed the reported differences in SOC stocks under agroforestry…
	ex			ex	Chen, H.; Li, D.; Feng, W.; Niu, S.; Plante, A. F.; Luo, Y.; Wang, K.	Different responses of soil organic carbon fractions to additions of nitrogen	{2018}	{NOV}	{EUROPEAN JOURNAL OF SOIL SCIENCE}	{69}	{6}	{1098-1104}	{Carbon-nitrogen (C-N) interactions in terrestrial ecosystems regulate climate-C cycle feedbacks. How additions of N affect soil C sequestration and then regulate climate change, however, are not fully understood. Previous studies have assessed effects of N on bulk soil organic C (SOC) but have not yet carefully examined its effects on different SOC fractions, which determine how fast the N-regul…
	ex			ex	Chen, Ji; Luo, Yiqi; Garcia-Palacios, Pablo; Cao, Junji; Dacal, Marina; Zhou, Xuhui; Li, Jianwei; Xia, Jianyang; Niu, Shuli; Yang, Huiyi; Shelton, Shelby; Guo, Wei; van Groenigen, Kees Jan	Differential responses of carbon-degrading enzyme activities to warming: Implications for soil respiration	{2018}	{OCT}	{GLOBAL CHANGE BIOLOGY}	{24}	{10}	{4816-4826}	{Extracellular enzymes catalyze rate-limiting steps in soil organic matter decomposition, and their activities (EEAs) play a key role in determining soil respiration (SR). Both EEAs and SR are highly sensitive to temperature, but their responses to climate warming remain poorly understood. Here, we present a meta-analysis on the response of soil cellulase and ligninase activities and SR to warmin…
	ex			ex	Chen, De; Liu, Xiaoyu; Bian, Rongjun; Cheng, Kun; Zhang, Xuhui; Zheng, Jufeng; Joseph, Stephen; Crowley, David; Pan, Genxing; Li, Lianqing	Effects of biochar on availability and plant uptake of heavy metals - A meta-analysis	{2018}	{SEP 15}	{JOURNAL OF ENVIRONMENTAL MANAGEMENT}	{222}		{76-85}	{Biochar can be an effective amendment for immobilizing heavy metals in contaminated soils but has variable effects depending on its chemical and physical properties and those of the treated soil. To investigate the range of biochar's effects on heavy metal accumulation in plants in responses to the variation of soil, biochar and plant, we carried out a meta-analysis of the literature that was pu…
	ex			ex	Cong, Weiwei; Meng, Jun; Ying, Samantha C.	Impact of soil properties on the soil methane flux response to biochar addition: a meta-analysis	{2018}	{SEP 1}	{ENVIRONMENTAL SCIENCE-PROCESSES \& IMPACTS}	{20}	{9}	{1202-1209}	{In an effort to optimize soil management practices that can help mitigate terrestrial carbon emissions, biochar has been applied to a wide range of soil environments to examine its effect on soil greenhouse gas emissions. Such studies have shown that the soil methane (CH4) flux response can vary widely leading to both increase and decrease in CH4 flux upon biochar amendment. To address this disc…
	ex			ex	Dai, Zhongmin; Su, Weiqin; Chen, Huaihai; Barberan, Albert; Zhao, Haochun; Yu, Mengjie; Yu, Lu; Brookes, Philip C.; Schadt, Christopher W.; Chang, Scott X.; Xu, Jianming	Long-term nitrogen fertilization decreases bacterial diversity and favors the growth of Actinobacteria and Proteobacteria in agro-ecosystems across the globe	{2018}	{AUG}	{GLOBAL CHANGE BIOLOGY}	{24}	{8}	{3452-3461}	{Long-term elevated nitrogen (N) input from anthropogenic sources may cause soil acidification and decrease crop yield, yet the response of the belowground microbial community to long-term N input alone or in combination with phosphorus (P) and potassium (K) is poorly understood. We explored the effect of long-term N and NPK fertilization on soil bacterial diversity and community composition usin…
	ex		ex		Ding, Fan; Van Zwieten, Lukas; Zhang, Weidong; Weng, Zhe (Han); Shi, Shengwei; Wang, Jingkuan; Meng, Jun	A meta-analysis and critical evaluation of influencing factors on soil carbon priming following biochar amendment	{2018}	{APR}	{JOURNAL OF SOILS AND SEDIMENTS}	{18}	{4}	{1507-1517}	{Previous studies have found biochar-induced effects on native soil organic carbon (NSOC) decomposition, with a range of positive, negative and no priming reported. However, many uncertainties still exist regarding which parameters drive the amplitude and the direction of the biochar priming. We conducted a quantitative analysis of 1170 groups of data from 27 incubation studies using boosted regr…
	ex			ex	Djukic, Ika; Kepfer-Rojas, Sebastian; Schmidt, Inger Kappel; Larsen, Klaus Steenberg; Beier, Claus; Berg, Bjoern; Verheyen, Kris; Caliman, Adriano; Paquette, Alain; Gutierrez-Giron, Alba; Humber, Alberto; Valdecantos, Alejandro; Petraglia, Alessandro; Alexander, Heather; Augustaitis, Algirdas; Saillard, Amelie; Ruiz Fernandez, Ana Carolina; Sousa, Ana I.; Lillebo, Ana I.; da Rocha Gripp, Anderson…	Early stage litter decomposition across biomes	{2018}	{JUL 1}	{SCIENCE OF THE TOTAL ENVIRONMENT}	{628-629}		{1369-1394}	{Through litter decomposition enormous amounts of carbon is emitted to the atmosphere. Numerous large-scale decomposition experiments have been conducted focusing on this fundamental soil process in order to understand the controls on the terrestrial carbon transfer to the atmosphere. However, previous studies were mostly based on site-specific litter and methodologies, adding major uncertainty t…
	ex			ex	Eze, Samuel; Palmer, Sheila M.; Chapman, Pippa J.	Soil organic carbon stock in grasslands: Effects of inorganic fertilizers, liming and grazing in different climate settings	{2018}	{OCT 1}	{JOURNAL OF ENVIRONMENTAL MANAGEMENT}	{223}		{74-84}	{Grasslands store about 34\% of the global terrestrial carbon (C) and are vital for the provision of various ecosystem services such as forage and climate regulation. About 89\% of this grassland C is stored in the soil and is affected by management activities but the effects of these management activities on C storage under different climate settings are not known. In this study, we synthesized …
Chinese experiments only	ex	ex			Feliciano, Diana; Ledo, Alicia; Hillier, Jon; Nayak, Dali Rani	Which agroforestry options give the greatest soil and above ground carbon benefits in different world regions?	{2018}	{FEB 15}	{AGRICULTURE ECOSYSTEMS \& ENVIRONMENT}	{254}		{117-129}	{Climate change mitigation and food security are two of the main challenges of human society. Agroforestry systems, defined as the presence of trees on external and internal boundaries, cropland, or on any other available niche of farmland, can provide both climate change mitigation and food. There are several types of agroforestry systems with different rates of above ground and soil carbon (C) …
	ex			ex	Jarvis, Nicholas	Meta-analysis of pesticide sorption in subsoil	{2018}	{MAR}	{ENVIRONMENTAL TOXICOLOGY AND CHEMISTRY}	{37}	{3}	{755-761}	{Models used to assess leaching risks generally use organic carbon partition coefficient (k(OC)) values derived from batch experiments on topsoil samples to estimate pesticide sorption in subsoils of much smaller organic carbon contents. This can introduce significant errors in leaching risk calculations, because inorganic sorbents can play an important role for sorption in subsoil. The objective…
	ex			ex	Jiang, Guiying; Zhang, Wenju; Xu, Minggang; Kuzyakov, Yakov; Zhang, Xubo; Wang, Jinzhou; Di, Jiaying; Murphy, V, Daniel	Manure and Mineral Fertilizer Effects on Crop Yield and Soil Carbon Sequestration: A Meta-Analysis and Modeling Across China	{2018}	{NOV}	{GLOBAL BIOGEOCHEMICAL CYCLES}	{32}	{11}	{1659-1672}	{Manure application to soil has declined globally due to increased availability of mineral fertilizers. However, mineral fertilizer overuse has caused serious consequences for soil quality and the environment. We analyzed the results of 20 long-term field trials (22-32 years, start year {[}ranged from 1980 to 1990] to 2012) and combined this with a climate change model and soil organic carbon (SO…
	ex			ex	Jin, Shaofei	Recommended nitrogen fertilization enhances soil carbon sequestration in China's monsoonal temperate zone	{2018}	{NOV 16}	{PEERJ}	{6}			{China consumes more than one-third of the world's nitrogen (N) fertilizer, and an increasing amount of N fertilizer has been applied over the past decades. Although N fertilization can increase the carbon sequestration potentials of cropland in China, the quantitative effects of different N fertilizer application levels on soil carbon changes have not been evaluated. Therefore, a 12-year cultiva…
	ex			ex	Khaledian, Yones; Quinton, John N.; Brevik, Eric C.; Pereira, Paulo; Zeraatpisheh, Mojtaba	Developing global pedotransfer functions to estimate available soil phosphorus	{2018}	{DEC 10}	{SCIENCE OF THE TOTAL ENVIRONMENT}	{644}		{1110-1116}	{There are a large number of investigations that estimate available soil phosphorous (P), but a paucity of global data on available soil P. One significant modern challenge is developing low cost, accurate approaches to predict available soil P that are useful to scientists around the world. We conducted a global meta-analysis using data on available soil P from 738 sites, 640 in the USA and 149 …
	ex			ex	Li, Changjia; Grayson, Richard; Holden, Joseph; Li, Pengfei	Erosion in peatlands: Recent research progress and future directions	{2018}	{OCT}	{EARTH-SCIENCE REVIEWS}	{185}		{870-886}	{Peatlands cover approximately 2.84\% of global land area while storing one third to one half of the world's soil carbon. While peat erosion is a natural process it has been enhanced by human mismanagement in many places worldwide. Enhanced peat erosion is a serious ecological and environmental problem that can have severe on site and off-site impacts. A 2007 monograph by Evans and Warburton synt…
	ex			ex	Li, Siqi; Zheng, Xunhua; Liu, Chunyan; Yao, Zhisheng; Zhang, Wei; Han, Shenghui	Influences of observation method, season, soil depth, land use and management practice on soil dissolvable organic carbon concentrations: A meta-analysis	{2018}	{AUG 1}	{SCIENCE OF THE TOTAL ENVIRONMENT}	{631-632}		{105-114}	{Quantifications of soil dissolvable organic carbon concentrations, together with other relevant variables, are needed to understand the carbon biogeochemistry of terrestrial ecosystems. Soil dissolvable organic carbon can generally be grouped into two incomparable categories. One is soil extractable organic carbon (EOC), which is measured by extracting with an aqueous extractant (distilled water…
	ex			ex	Li, Yuan; Chang, Scott X.; Tian, Lihua; Zhang, Qingping	Conservation agriculture practices increase soil microbial biomass carbon and nitrogen in agricultural soils: A global meta-analysis	{2018}	{JUN}	{SOIL BIOLOGY \& BIOCHEMISTRY}	{121}		{50-58}	{Conservation agriculture through the use of crop residue retention and no-tillage (NT) has been widely practiced to improve agricultural soil quality, such as to increase soil organic carbon (C) content and the microbial population size. However, there has been no quantitative analysis on the effect of conservation agriculture, particularly in relation to crop residue retention, on soil microbia…
Chinese experiments only	ex	ex			Li, Yu'e; Shi, Shengwei; Waqas, Muhammad Ahmed; Zhou, Xiaoxia; Li, Jianling; Wan, Yunfan; Qin, Xiaobo; Gao, Qingzhu; Liu, Shuo; Wilkes, Andreas	Long-term (>= 20 years) application of fertilizers and straw return enhances soil carbon storage: a meta-analysis	{2018}	{APR}	{MITIGATION AND ADAPTATION STRATEGIES FOR GLOBAL CHANGE}	{23}	{4}	{603-619}	{Increasing soil carbon (C) storage is crucial to addressing climate change and ensuring food security. The C sequestration potential of the world's cropland soil is 0.4-0.8 Pg soil C year(-1), which may be achieved through the adoption of recommended management practices (RMPs), including fertilizer management. This study aimed to quantitatively evaluate the influence of long-term application of…
	ex			ex	Liu, Qi; Zhang, Yanhui; Liu, Benjuan; Amonette, James E.; Lin, Zhibin; Liu, Gang; Ambus, Per; Xie, Zubin	How does biochar influence soil N cycle? A meta-analysis	{2018}	{MAY}	{PLANT AND SOIL}	{426}	{1-2}	{211-225}	{Background and aims Modern agriculture is driving the release of excessive amounts of reactive nitrogen (N) from the soils to the environment, thereby threatening ecological balances and functions. The amendment of soils with biochar has been suggested as a promising solution to regulate the soil N cycle and reduce N effluxes. However, a comprehensive and quantitative understanding of biochar im…
	ex			ex	Liu, Xiang; Yang, Tao; Wang, Quan; Huang, Farong; Li, Lanhai	Dynamics of soil carbon and nitrogen stocks after afforestation in arid and semi-arid regions: A meta-analysis	{2018}	{MAR 15}	{SCIENCE OF THE TOTAL ENVIRONMENT}	{618}		{1658-1664}	{Arid and semi-arid regions store approximately 27\% of global soil organic carbon (SOC), thus playing an important role in the global carbon cycle. Although afforestation is widely used to achieve the goals of landscape protection and ecological restoration in these regions, its effects on the dynamics of SOC and total nitrogen (TN) stocks as well as the related controlling factors are still poo…
	ex			ex	Luo, Gongwen; Li, Ling; Friman, Ville-Petri; Guo, Junjie; Guo, Shiwei; Shen, Qirong; Ling, Ning	Organic amendments increase crop yields by improving microbe-mediated soil functioning of agroecosystems: A meta-analysis	{2018}	{SEP}	{SOIL BIOLOGY \& BIOCHEMISTRY}	{124}		{105-115}	{Although numerous studies suggest that organic amendments are better at maintaining soil fertility and crop production than mineral-only fertilization, it is unclear if this occurs in different agricultural systems on a global scale. Here we report a comprehensive meta-analysis of 690 independent experiments comparing the performance of organic amendments and mineral-only fertilization on crop y…
	ex			ex	Ma, Dedi; Chen, Lei; Qu, Hongchao; Wang, Yilin; Misselbrook, Tom; Jiang, Rui	Impacts of plastic film mulching on crop yields, soil water, nitrate, and organic carbon in Northwestern China: A meta-analysis	{2018}	{APR 1}	{AGRICULTURAL WATER MANAGEMENT}	{202}		{166-173}	{In order to increase crop yield in semi-arid and arid areas, plastic film mulching (PFM) is widely used in Northwestern China. To date, many studies have addressed the effects of PFM on soil physical and biochemical properties in rain-fed agriculture in Northwestern China, but the findings of different studies are often contradictory. Therefore, a comprehensive review of the impacts of PFM on so…
	ex			ex	Mahal, Navreet K.; Castellano, Michael J.; Miguez, Fernando E.	Conservation Agriculture Practices Increase Potentially Mineralizable Nitrogen: A Meta-Analysis	{2018}	{SEP-OCT}	{SOIL SCIENCE SOCIETY OF AMERICA JOURNAL}	{82}	{5}	{1270-1278}	{Potentially mineralizable nitrogen (PMN) is considered an important indicator of soil health. Cropping systems management can affect PMN. However, the effect size and relationship with crop yield across specific management practices remain uncertain. We conducted a quantitative review to understand how conservation agriculture management practices affect PMN including N fertilizer application, c…
	ex			ex	Mei, Kun; Wang, Zhenfeng; Huang, Hong; Zhang, Chi; Shang, Xu; Dahlgren, Randy A.; Zhang, Minghua; Xia, Fang	Stimulation of N2O emission by conservation tillage management in agricultural lands: A meta-analysis	{2018}	{OCT}	{SOIL \& TILLAGE RESEARCH}	{182}		{86-93}	{Conservation tillage has been widely adopted in agricultural lands worldwide and is considered a potential strategy for climate change mitigation through enhanced carbon sequestration. However, conservation tillage may alter soil N2O emissions, which may diminish the potential climate change mitigation benefits. Based on 212 observations from 40 publications, a meta-analysis was conducted to qua…
	ex			ex	Minasny, B.; McBratney, A. B.	Limited effect of organic matter on soil available water capacity	{2018}	{JAN}	{EUROPEAN JOURNAL OF SOIL SCIENCE}	{69}	{1}	{39-47}	{Soil water-holding capacity is an important component of the water and energy balances of the terrestrial biosphere. It controls the rate of evapotranspiration, and is a key to crop production. It is widely accepted that the available water capacity in soil can be improved by increasing organic matter content. However, the increase in amount of water that is available to plants with an increase …
	ex			ex	Ren, Fengling; Zhang, Xubo; Liu, Jian; Sun, Nan; Sun, Zhigang; Wu, Lianhai; Xu, Minggang	A synthetic analysis of livestock manure substitution effects on organic carbon changes in China's arable topsoil	{2018}	{DEC}	{CATENA}	{171}		{1-10}	{Application of livestock manure has been recognized as an important strategy for enhancing soil organic carbon (SOC) stocks. However, the magnitude of manure application impacts on SOC changes as compared with conventional mineral fertilizers still needs to be better assessed. In this study, we conducted a meta-analysis to address the effects of various fertilization practices on SOC changes in …
	ex			ex	Ren, Chengjie; Chen, Ji; Lu, Xingjie; Doughty, Russell; Zhao, Fazhu; Zhong, Zekun; Han, Xinhui; Yang, Gaihe; Feng, Yongzhong; Ren, Guangxin	Responses of soil total microbial biomass and community compositions to rainfall reductions	{2018}	{JAN}	{SOIL BIOLOGY \& BIOCHEMISTRY}	{116}		{4-10}	{Rainfall reductions influence ecosystem processes through impacts on the microbial community. However, the response of soil microbial community and their interactions with ecosystem processes remain unclear. In this study, we conducted a meta-analysis to synthesize the response of soil total microbial biomass and community composition to experimental rainfall reductions and the implications for …
agroforestry only	ex	ex			Shi, Lingling; Feng, Wenting; Xu, Jianchu; Kuzyakov, Yakov	Agroforestry systems: Meta-analysis of soil carbon stocks, sequestration processes, and future potentials	{2018}	{NOV}	{LAND DEGRADATION \& DEVELOPMENT}	{29}	{11}	{3886-3897}	{Agroforestry (AF) has the potential to restore degraded lands, provide a broader range of ecosystem goods and services such as carbon (C) sequestration and high biodiversity, and increase soil fertility and ecosystem stability through additional C input from trees, erosion prevention, and microclimate improvement. Advantages and processes for global C sequestration in AF are unknown. We used a m…
	ex			ex	Sirimarco, Ximena; Paula Barral, Maria; Horacio Villarino, Sebastian; Laterra, Pedro	Water regulation by grasslands: A global meta-analysis	{2018}	{JUN}	{ECOHYDROLOGY}	{11}	{4}		{Grasslands have been modified and replaced worldwide and have affected water regulation ecosystem services. In order to support public policies attending to the consequences of different grassland modifications and replacements, general patterns and models about their consequences on water regulation are needed. We quantitatively meta-analysed the results of 110 site-specific studies analysing i…
	ex			ex	Sulman, Benjamin N.; Moore, Jessica A. M.; Abramoff, Rose; Averill, Colin; Kivlin, Stephanie; Georgiou, Katerina; Sridhar, Bhavya; Hartman, Melannie D.; Wang, Gangsheng; Wieder, William R.; Bradford, Mark A.; Luo, Yiqi; Mayes, Melanie A.; Morrison, Eric; Riley, William J.; Salazar, Alejandro; Schimel, Joshua P.; Tang, Jinyun; Classen, Aimee T.	Multiple models and experiments underscore large uncertainty in soil carbon dynamics	{2018}	{NOV}	{BIOGEOCHEMISTRY}	{141}	{2}	{109-123}	{Soils contain more carbon than plants or the atmosphere, and sensitivities of soil organic carbon (SOC) stocks to changing climate and plant productivity are a major uncertainty in global carbon cycle projections. Despite a consensus that microbial degradation and mineral stabilization processes control SOC cycling, no systematic synthesis of long-term warming and litter addition experiments has…
	ex			ex	Thorn, Simon; Baessler, Claus; Brandl, Roland; Burton, Philip J.; Cahall, Rebecca; Campbell, John L.; Castro, Jorge; Choi, Chang-Yong; Cobb, Tyler; Donato, Daniel C.; Durska, Ewa; Fontaine, Joseph B.; Gauthier, Sylvie; Hebert, Christian; Hothorn, Torsten; Hutto, Richard L.; Lee, Eun-Jae; Leverkus, Alexandro B.; Lindenmayer, David B.; Obrist, Martin K.; Rost, Josep; Seibold, Sebastian; Seidl, Rupe…	Impacts of salvage logging on biodiversity: A meta-analysis	{2018}	{JAN}	{JOURNAL OF APPLIED ECOLOGY}	{55}	{1}	{279-289}	{1. Logging to ``salvage{''} economic returns from forests affected by natural disturbances has become increasingly prevalent globally. Despite potential negative effects on biodiversity, salvage logging is often conducted, even in areas otherwise excluded from logging and reserved for nature conservation, inter alia because strategic priorities for post-disturbance management are widely lacking.…
	ex			ex	Wang, Li; Gan, Yantai; Wiesmeier, Martin; Zhao, Guiqin; Zhang, Ruiyang; Han, Guodong; Siddique, Kadambot H. M.; Hou, Fujiang	Grazing exclusion-An effective approach for naturally restoring degraded grasslands in Northern China	{2018}	{DEC}	{LAND DEGRADATION \& DEVELOPMENT}	{29}	{12}	{4439-4456}	{Nearly 90\% of the 390 million ha of grasslands in northern China are degraded. `Grazing exclusion' has been implemented as a nature-based solution to rejuvenate degraded grasslands, but the effectiveness of the rejuvenation processes is uncertain. Here, we investigated the effects of grazing exclusion on aboveground plant community traits, soil physiochemical and biological properties, and the …
	ex			ex	Wang, Yunqi; Zhang, Yinghua; Zhou, Shunli; Wang, Zhimin	Meta-analysis of no-tillage effect on wheat and maize water use efficiency in China	{2018}	{SEP 1}	{SCIENCE OF THE TOTAL ENVIRONMENT}	{635}		{1372-1382}	{No-tillage (NT) is a popular agricultural technique worldwide, but it remains unclear how NT affects the yield, evapotranspiration (ET), and water use efficiency (WUE) of maize and wheat. We performed a meta-analysis of the NT effects on the yield, ET and WUE for wheat and maize based on the literatures published during 1950-2018. Yield, ET, and WUE varied by species, region, and agronomic and e…
	ex			ex	Wang, Chao; Liu, Dongwei; Bai, Edith	Decreasing soil microbial diversity is associated with decreasing microbial biomass under nitrogen addition	{2018}	{MAY}	{SOIL BIOLOGY \& BIOCHEMISTRY}	{120}		{126-133}	{While aboveground biodiversity has been widely studied, how microbial biodiversity responds to increasing nitrogen (N) deposition is still unclear. Here we conducted a meta-analysis to investigate the responses of soil microbial diversity and composition to N addition. Overall, we found N addition decreased both soil microbial diversity and the relative abundance of Actinobacteria and Nitrospira…
	in				Xia, Longlong; Lam, Shu Kee; Wolf, Benjamin; Kiese, Ralf; Chen, Deli; Butterbach-Bahl, Klaus	Trade-offs between soil carbon sequestration and reactive nitrogen losses under straw return in global agroecosystems	{2018}	{DEC}	{GLOBAL CHANGE BIOLOGY}	{24}	{12}	{5919-5932}	{It is widely recommended that crop straw be returned to croplands to maintain or increase soil carbon (C) storage in arable soils. However, because C and nitrogen (N) biogeochemical cycles are closely coupled, straw return may also affect soil reactive N (Nr) losses, but these effects remain uncertain, especially in terms of the interactions between soil C sequestration and Nr losses under straw…
	ex			ex	Zhang, Xinzhong; Guan, Dexin; Li, Weibin; Sun, Di; Jin, Changjie; Yuan, Fenghui; Wang, Anzhi; Wu, Jiabing	The effects of forest thinning on soil carbon stocks and dynamics: A meta-analysis	{2018}	{DEC 1}	{FOREST ECOLOGY AND MANAGEMENT}	{429}		{36-43}	{Forest thinning is widely used in forest management activities and has complex effects on underground carbon processes. Although many case studies have been done, how forest thinning affects soil carbon stocks and dynamics remains unclear, especially at different recovery stage. Here, we synthesized the results from 53 peer reviewed publications and conducted a meta-analysis to evaluate the gene…
	ex			ex	Zhang, Tian'an; Luo, Yiqi; Chen, Han Y. H.; Ruan, Honghua	Responses of litter decomposition and nutrient release to N addition: A meta-analysis of terrestrial ecosystems	{2018}	{JUL}	{APPLIED SOIL ECOLOGY}	{128}		{35-42}	{As atmospheric nitrogen (N) concentrations increase, it can wreak havoc on the entire planet, as well as the fragile ecosystems, once it exceeds the demand of ecosystems. Chronically elevated N deposition affects litter decomposition, which is a crucial process that controls nutrient cycling, soil fertility, and primary productivity. Nevertheless, the responses of litter decomposition and nutrie…
	ex			ex	Zhou, Zhenghu; Wang, Chuankuan; Luo, Yiqi	Effects of forest degradation on microbial communities and soil carbon cycling: A global meta-analysis	{2018}	{JAN}	{GLOBAL ECOLOGY AND BIOGEOGRAPHY}	{27}	{1}	{110-124}	{Aim: The aim was to explore how conversions of primary or secondary forests to plantations or agricultural systems influence soil microbial communities and soil carbon (C) cycling. Location: Global. Time period: 1993-2017. Major taxa studied: Soil microbes. Methods: A meta-analysis was conducted to examine effects of forest degradation on soil properties and microbial attributes related to micro…
	ex		ex		Alvarez, Roberto; Steinbach, Haydee S.; De Paepe, Josefina L.	Cover crop effects on soils and subsequent crops in the pampas: A meta-analysis	{2017}	{JUL}	{SOIL \& TILLAGE RESEARCH}	{170}		{53-65}	{Cover crops are a valuable management option for reducing soil erosion and nitrogen losses from agroecosystems. They improve soil quality but the impacts on crop yield depend on the type of cover crop, the commercial crop considered and the climate. In the Argentine Pampas the introduction of cover crops in rotations is being extensively studied by official institutions. We performed a meta-anal…
	ex			ex	Basche, Andrea; DeLonge, Marcia	The Impact of Continuous Living Cover on Soil Hydrologic Properties: A Meta-Analysis	{2017}	{SEP-OCT}	{SOIL SCIENCE SOCIETY OF AMERICA JOURNAL}	{81}	{5}	{1179-1190}	{Increased rainfall variability due to climate change threatens the efficacy of critical soil ecosystem services. One strategy to negate effects of too much or not enough rainfall is to improve soil water properties. Practices that offer ``continuous living cover{''} can enhance soil water storage and other soil hydrologic properties relative to annual crop systems, but to what extent such benefi…
	ex			ex	Cheng, Yi; Wang, Jing; Wang, Jinyang; Chang, Scott X.; Wang, Shenqiang	The quality and quantity of exogenous organic carbon input control microbial NO3- immobilization: A meta-analysis	{2017}	{DEC}	{SOIL BIOLOGY \& BIOCHEMISTRY}	{115}		{357-363}	{The accumulation of NOT in the soil has resulted in increased nitrogen (N) loss through runoff, leaching, and gaseous emissions. Microbial immobilization of NOT as an important process in reducing soil NOT accumulation has been for a long time neglected due to the predominant viewpoint that microbes preferentially immobilize NHS4+-N. Microbial NOT immobilization is generally carbon (C)-limited, …
	ex			ex	Daryanto, Stefani; Wang, Lixin; Jacinthe, Pierre Andre	Meta-Analysis of Phosphorus Loss from No-Till Soils	{2017}	{SEP-OCT}	{JOURNAL OF ENVIRONMENTAL QUALITY}	{46}	{5}	{1028-1037}	{Agriculture is a significant contributor to phosphorus (P) enrichment in aquatic ecosystems. No-till (NT) farming has been proposed as an alternative approach to conventional tillage (CT) in reducing soil P export, but published data have shown contrasting impacts, likely due to the interacting effects of different physical (climate region, rainfall variability, transport pathway, slope gradient…
	ex			ex	Du, Zhangliu; Angers, Denis A.; Ren, Tusheng; Zhang, Qingzhong; Li, Guichun	The effect of no-till on organic C storage in Chinese soils should not be overemphasized: A meta-analysis	{2017}	{JAN 2}	{AGRICULTURE ECOSYSTEMS \& ENVIRONMENT}	{236}		{1-11}	{No-till (NT) has been widely regarded as a potential option to enhance soil organic carbon (SOC) sequestration and thus mitigate climate change. However, recent studies have shown that previous estimates of SOC storage under NT seem to be overestimated due to shallow sampling and improper SOC accounting. In China, the overall trend and magnitude of changes in SOC storage in response to NT adopti…
	ex			ex	Eagle, Alison J.; Olander, Lydia P.; Locklier, Katie L.; Heffernan, James B.; Bernhardt, Emily S.	Fertilizer Management and Environmental Factors Drive N2O and NO3 Losses in Corn: A Meta-Analysis	{2017}	{SEP-OCT}	{SOIL SCIENCE SOCIETY OF AMERICA JOURNAL}	{81}	{5}	{1191-1202}	{Effective management of nitrogen (N) in agricultural landscapes must account for how nitrate (NO3) leaching and nitrous oxide (N2O) emissions respond to local field-scale management and to broader environmental drivers such as climate and soil. We assembled a comprehensive database of fertilizer management studies with data on N2O (417 observations, 27 studies) and NO3 (388 observations, 25 stud…
	ex			ex	Elena, Curcio; Tiziana, Danise; Michele, Innangi; Elio, Coppola; Marta, Alvarez-Romero; Antonietta, Fioretto; Stefania, Papa	SOIL CHARACTERIZATION AND COMPARISON OF ORGANIC MATTER QUALITY AND QUANTITY OF TWO STANDS UNDER DIFFERENT VEGETATION COVER ON MONTE FAITO (CAMPANIA, S-ITALY)	{2017}		{FRESENIUS ENVIRONMENTAL BULLETIN}	{26}	{1}	{8-18}	{Soil is the largest terrestrial carbon pool, of which about 20\% is stored in forest soils. The dominant species of each forest typology strongly influence structure, function and activity of soil microbial communities. There is a substantial lack of studies integrating analyses on soil chemical physical features and biological activities in soil deep layers under different canopies. Accordingly…
	ex			ex	German, Richard N.; Thompson, Catherine E.; Benton, Tim G.	Relationships among multiple aspects of agriculture's environmental impact and productivity: a meta-analysis to guide sustainable agriculture	{2017}	{MAY}	{BIOLOGICAL REVIEWS}	{92}	{2}	{716-738}	{Given the pressures on land to produce ever more food, doing it `sustainably' is growing in importance. However, `sustainable agriculture' is complex to define, not least because agriculture impacts in many different ways and it is not clear how different aspects of sustainability may be in synergy or trade off against each other. We conducted a meta-analysis to assess the relationships between …
	ex			ex	van Groenigen, Kees Jan; Osenberg, Craig W.; Terrer, Cesar; Carrillo, Yolima; Dijkstra, Feike A.; Heath, James; Nie, Ming; Pendall, Elise; Phillips, Richard P.; Hungate, Bruce A.	Faster turnover of new soil carbon inputs under increased atmospheric CO2	{2017}	{OCT}	{GLOBAL CHANGE BIOLOGY}	{23}	{10}	{4420-4429}	{Rising levels of atmospheric CO2 frequently stimulate plant inputs to soil, but the consequences of these changes for soil carbon (C) dynamics are poorly understood. Plant-derived inputs can accumulate in the soil and become part of the soil C pool ({''}new soil C{''}), or accelerate losses of pre-existing ({''}old{''}) soil C. The dynamics of the new and old pools will likely differ and alter t…
	ex			ex	Hulugalle, N. R.; Strong, C.; McPherson, K.; Nachimuthu, G.	Carbon, nitrogen and phosphorus stoichiometric ratios under cotton cropping systems in Australian Vertisols: a meta-analysis of seven experiments	{2017}	{APR}	{NUTRIENT CYCLING IN AGROECOSYSTEMS}	{107}	{3}	{357-367}	{Enhancing storage of carbon (C) in agricultural soil has been proposed as a partial solution to offset the accelerated release of greenhouse gases associated with global warming. A net loss of soil C is common in most cotton (Gossypium hirsutum L.)-based farming systems in Australian Vertisols. Some authors have suggested that an ``ideal{''} stoichiometric ratio C:N:P:S of 10,000:833:200:143 was…
	ex			ex	Huo, Changfu; Luo, Yiqi; Cheng, Weixin	Rhizosphere priming effect: A meta-analysis	{2017}	{AUG}	{SOIL BIOLOGY \& BIOCHEMISTRY}	{111}		{78-84}	{Rhizosphere priming is crucial for regulating soil carbon and nitrogen biogeochemical cycles. An appreciable number of studies have been conducted to quantify the rhizosphere priming effect (RPE), and have shown that the RPE is sensitive to changes of plant and soil conditions. These diverse results across individual studies offer us an opportunity to explore for potential general patterns and v…
	ex			ex	Lin, Guigang; Zeng, De-Hui	Heterogeneity in decomposition rates and annual litter inputs within fine-root architecture of tree species: Implications for forest soil carbon accumulation	{2017}	{APR 1}	{FOREST ECOLOGY AND MANAGEMENT}	{389}		{386-394}	{Fine roots (<= 2 mm in diameter) of tree species, traditionally regarded as homogenous entities, are expected to be major contributors of forest soil organic carbon (C), but their contributions need to be reevaluated given the heterogeneity in many root characteristics within fine-root architecture. Here, literature data were synthesized to analyze whether there existed heterogeneity of decompos…
	ex			ex	Marcillo, G. S.; Miguez, F. E.	Corn yield response to winter cover crops: An updated meta-analysis	{2017}	{MAY-JUN}	{JOURNAL OF SOIL AND WATER CONSERVATION}	{72}	{3}	{226-239}	{Winter cover crops (WCCs) provide agronomic and environmental benefits, although their impacts on subsequent crop yields have been reported to vary across regions, soils, or under different farm practices. To address the variability in response, previous qualitative and quantitative reviews have summarized the overall yield effects of WCCs. However, the results from such reviews need constant re…
	ex			ex	McGonigle, Terence P.; Turner, William G.	Grasslands and Croplands Have Different Microbial Biomass Carbon Levels per Unit of Soil Organic Carbon	{2017}	{JUL}	{AGRICULTURE-BASEL}	{7}	{7}		{Primarily using cropped systems, previous studies have reported a positive linear relationship between microbial biomass carbon (MBC) and soil organic carbon (SOC). We conducted a meta-analysis to explore this relationship separately for grasslands and croplands using available literature. Studies were limited to those using fumigation-extraction for MBC for field samples. Trials were noted sepa…
	ex			ex	Musolff, Andreas; Selle, Benny; Bttner, Olaf; Opitz, Michael; Tittel, Joerg	Unexpected release of phosphate and organic carbon to streams linked to declining nitrogen depositions	{2017}	{MAY}	{GLOBAL CHANGE BIOLOGY}	{23}	{5}	{1891-1901}	{Reductions in emissions have successfully led to a regional decline in atmospheric nitrogen depositions over the past 20 years. By analyzing long-term data from 110 mountainous streams draining into German drinking water reservoirs, nitrate concentrations indeed declined in the majority of catchments. Furthermore, our meta-analysis indicates that the declining nitrate levels are linked to the re…
	ex			ex	Panichini, Marcelo; Neculman, Rodrigo; Godoy, Roberto; Arancibia-Miranda, Nicolas; Matus, Francisco	Understanding carbon storage in volcanic soils under selectively logged temperate rainforests	{2017}	{SEP 15}	{GEODERMA}	{302}		{76-88}	{A disturbance due to selective logging causes the release of carbon from forest soils. Here, we examine this effect under Nothofagus stands in Andisols of southern Chile (39 degrees 38'S, 72 degrees 02'W, > 4000 mm yr(-1)). We postulate that soil carbon destabilization caused by forest management is counteracted by two contrasting carbon stabilization mechanisms linked to pedogenic processes: (1…
	ex			ex	Ren, Chengjie; Zhao, Fazhu; Shi, Zheng; Chen, Ji; Han, Xinhui; Yang, Gaihe; Feng, Yongzhong; Ren, Guangxin	Differential responses of soil microbial biomass and carbon-degrading enzyme activities to altered precipitation	{2017}	{DEC}	{SOIL BIOLOGY \& BIOCHEMISTRY}	{115}		{1-10}	{Altered precipitation regimes have a great impact on global climate change, with potentially important effects on below-ground carbon dynamics. Soil microbes and carbon (C)-degrading extracellular enzymes activities (EEAs) are considered as the rate-limiting step in C decomposition. However, the effect of altered precipitation on the microbial biomass, microbial EEAs, and mechanism for soil C dy…
	ex			ex	Rubin, Rachel L.; van Groenigen, Kees Jan; Hungate, Bruce A.	Plant growth promoting rhizobacteria are more effective under drought: a meta-analysis	{2017}	{JUL}	{PLANT AND SOIL}	{416}	{1-2}	{309-323}	{Plant growth promoting rhizobacteria (PGPR) have been shown to reduce abiotic stress on plants, but these effects have not been quantitatively synthesized. We evaluated the degree to which plant growth promoting rhizobacteria (PGPR) improve plant performance with and without drought stress. We used meta-analysis to summarize 52 published articles on the effects of PGPR on root mass, shoot mass a…
	ex			ex	Sileshi, Gudeta W.; Nhamo, Nhamo; Mafongoya, Paramu L.; Tanimu, Joseph	Stoichiometry of animal manure and implications for nutrient cycling and agriculture in sub-Saharan Africa	{2017}	{JAN}	{NUTRIENT CYCLING IN AGROECOSYSTEMS}	{107}	{1}	{91-105}	{A number of studies have recommended application of large quantities of manure alone or in combination with inorganic fertilizer in sub-Saharan Africa (SSA). However, yield responses of cereals such as maize are very modest even at manure application rates exceeding 10 t ha(-1) year(-1). We conducted a meta-analysis of data from 64 studies across 14 countries in SSA in order to explore variabili…
	ex			ex	Silva, Aijanio G. B.; Sequeira, Cleiton H.; Sermarini, Renata A.; Otto, Rafael	Urease Inhibitor NBPT on Ammonia Volatilization and Crop Productivity: A Meta-Analysis	{2017}	{JAN-FEB}	{AGRONOMY JOURNAL}	{109}	{1}	{1-13}	{The urease inhibitor N-(n-butyl) thiophosphoric triamide (NBPT) slows urea hydrolysis, reduces NH3 volatilization loss, and enhances N availability to plants. Even though most studies have proved the potential of NBPT-treated urea to reduce NH3 loss, the benefits to increase crop yield have been less consistent, mainly because N is not always the limiting factor. A meta-analysis was carried out …
	ex			ex	Tarafdar, Abhrajyoti; Sinha, Alok	Cancer Risk Assessment of Polycyclic Aromatic Hydrocarbons in the Soils and Sediments of India: A Meta-Analysis	{2017}	{OCT}	{ENVIRONMENTAL MANAGEMENT}	{60}	{4}	{784-795}	{A carcinogenic risk assessment of polycyclic aromatic hydrocarbons in soils and sediments was conducted using the probabilistic approach from a national perspective. Published monitoring data of polycyclic aromatic hydrocarbons present in soils and sediments at different study points across India were collected and converted to their corresponding BaP equivalent concentrations. These BaP equival…
	ex			ex	Thompson, Luke R.; Sanders, Jon G.; McDonald, Daniel; Amir, Amnon; Ladau, Joshua; Locey, Kenneth J.; Prill, Robert J.; Tripathi, Anupriya; Gibbons, Sean M.; Ackermann, Gail; Navas-Molina, Jose A.; Janssen, Stefan; Kopylova, Evguenia; Vazquez-Baeza, Yoshiki; Gonzalez, Antonio; Morton, James T.; Mirarab, Siavash; Xu, Zhenjiang Zech; Jiang, Lingjing; Haroon, Mohamed F.; Kanbar, Jad; Zhu, Qiyun; Song…	A communal catalogue reveals Earth's multiscale microbial diversity	{2017}	{NOV 23}	{NATURE}	{551}	{7681}	{457+}	{Our growing awareness of the microbial world's importance and diversity contrasts starkly with our limited understanding of its fundamental structure. Despite recent advances in DNA sequencing, a lack of standardized protocols and common analytical frameworks impedes comparisons among studies, hindering the development of global inferences about microbial life on Earth. Here we present a meta-an…
	ex			ex	Wei, Hui; Xiang, Yangzhou; Liu, Ying; Zhang, Jiaen	Effects of sod cultivation on soil nutrients in orchards across China: A meta-analysis	{2017}	{JUN}	{SOIL \& TILLAGE RESEARCH}	{169}		{16-24}	{Plantation of fruit trees is an important measure of agriculture and vegetation restoration as it produces economic output with obvious ecological effects, making orchards contribute greatly to increased vegetation coverage around the world. Sod cultivation in orchards is a popular management measure but whether it affects soil nutrient condition in different ways, e.g., among different climatic…
	ex			ex	Willis, Amy; Bunge, John; Whitman, Thea	Improved detection of changes in species richness in high diversity microbial communities	{2017}	{NOV}	{JOURNAL OF THE ROYAL STATISTICAL SOCIETY SERIES C-APPLIED STATISTICS}	{66}	{5}	{963-977}	{Biodiversity is important for balance and function of a broad variety of ecosystems, and identifying factors that influence biodiversity can assist environmental management and maintenance. However, low abundance taxa are often missing from ecosystem surveys. These rare taxa, which may be critical to the ecosystem function, are not accounted for in existing methods for detecting changes in speci…
upland and paddy field only	ex	ex			Xia, Longlong; Lam, Shu Kee; Yan, Xiaoyuan; Chen, Deli	How Does Recycling of Livestock Manure in Agroecosystems Affect Crop Productivity, Reactive Nitrogen Losses, and Soil Carbon Balance?	{2017}	{JUL 4}	{ENVIRONMENTAL SCIENCE \& TECHNOLOGY}	{51}	{13}	{7450-7457}	{Recycling of livestock manure in agroecosystems to partially substitute synthetic fertilizer nitrogen (N) input is recommended to alleviate the environmental degradation associated with synthetic N fertilization, which may also affect food security and soil greenhouse gas (GHG) emissions. However, how substituting livestock manure for synthetic N fertilizer affects crop productivity (crop yield;…
	ex			ex	Zhao, Xin; Liu, Sheng-Li; Pu, Chao; Zhang, Xiang-Qian; Xue, Jian-Fu; Ren, Yong-Xiang; Zhao, Xiu-Ling; Chen, Fu; Lal, Rattan; Zhang, Hai-Lin	Crop yields under no-till farming in China: A meta-analysis	{2017}	{MAR}	{EUROPEAN JOURNAL OF AGRONOMY}	{84}		{67-75}	{No-till (NT) farming is popular globally, however, the effects on crop yields remain debatable. A meta analysis was conducted on crop yield responses to NT in China based on 1006 comparisons from 164 studies. Results showed that a decrease of 2.1 +/- 1.8\% on crop yield was observed under NT with residue removed (NTO) compared with that under plow tillage with residue removed (PTO), but the decr…
	ex			ex	Zhou, Guiyao; Zhou, Xuhui; Zhang, Tao; Du, Zhenggang; He, Yanghui; Wang, Xihua; Shao, Junjiong; Cao, Ye; Xue, Shenggui; Wang, Hailong; Xu, Chengyuan	Biochar increased soil respiration in temperate forests but had no effects in subtropical forests	{2017}	{DEC 1}	{FOREST ECOLOGY AND MANAGEMENT}	{405}		{339-349}	{As a climate change mitigation strategy, biochar application to soil has been demonstrated to increase soil carbon (C) sequestration and reduce greenhouse gas (GHG) emission. Although numerous manipulative studies have been conducted, it is still not fully understood how biochar application affects soil respiration (Rs) and its components (i.e., autotrophic {[}Ra] and heterotrophic respiration {…
	ex			ex	Zhou, Huimin; Zhang, Dengxiao; Wang, Pan; Liu, Xiaoyu; Cheng, Kun; Li, Lianqing; Zheng, Jinwei; Zhang, Xuhui; Zheng, Jufeng; Crowley, David; van Zwieten, Lukas; Pan, Genxing	Changes in microbial biomass and the metabolic quotient with biochar addition to agricultural soils: A Meta-analysis	{2017}	{FEB 15}	{AGRICULTURE ECOSYSTEMS \& ENVIRONMENT}	{239}		{80-89}	{Biochar has been increasingly recommended for world agriculture, but the effects on microbial activities in agricultural soils has not yet thoroughly assessed. In this study, using a meta analysis of experiment data retrieved from literature published up to March 1, 2015, changes were examined in microbial biomass and soil respiration in agricultural soils with biochar addition. Microbial respon…
	ex			ex	Cai, Andong; Feng, Wenting; Zhang, Wenju; Xu, Minggang	Climate, soil texture, and soil types affect the contributions of fine-fraction-stabilized carbon to total soil organic carbon in different land uses across China	{2016}	{MAY 1}	{JOURNAL OF ENVIRONMENTAL MANAGEMENT}	{172}		{2-9}	{Mineral-associated organic carbon (MOC), that is stabilized by fine soil particles (i.e., silt plus clay, <53 mu m), is important for soil organic carbon (SOC) persistence and sequestration, due to its large contribution to total SOC (TSOC) and long turnover time. Our objectives were to investigate how climate, soil type, soil texture, and agricultural managements affect MOC contributions to TSO…
	ex			ex	Dlamini, Phesheya; Chivenge, Pauline; Chaplot, Vincent	Overgrazing decreases soil organic carbon stocks the most under dry climates and low soil pH: A meta-analysis shows	{2016}	{APR 1}	{AGRICULTURE ECOSYSTEMS \& ENVIRONMENT}	{221}		{258-269}	{Grasslands occupy about 40\% of the world's land surface and store approximately 10\% of the global soil organic carbon (SOC) stock. This SOC pool, in which a larger proportion is held in the topsoil (0-0.3 in), is strongly influenced by grassland management. Despite this, it is not yet fully understood how grassland SOC stocks respond to degradation, particularly for the different environmental…
	ex			ex	Hoyle, Frances C.; O'Leary, Rebecca A.; Murphy, Daniel V.	Spatially governed climate factors dominate management in determining the quantity and distribution of soil organic carbon in dryland agricultural systems	{2016}	{AUG 17}	{SCIENTIFIC REPORTS}	{6}			{Few studies describe the primary drivers influencing soil organic carbon (SOC) stocks and the distribution of carbon (C) fractions in agricultural systems from semi-arid regions; yet these soils comprise one fifth of the global land area. Here we identified the primary drivers for changes in total SOC and associated particulate (POC), humus (HOC) and resistant (ROC) organic C fractions for 1347 …
	ex			ex	Huang, Shan; Lv, Weisheng; Bloszies, Sean; Shi, Qinghua; Pan, Xiaohua; Zeng, Yongjun	Effects of fertilizer management practices on yield-scaled ammonia emissions from croplands in China: A meta-analysis	{2016}	{JUN}	{FIELD CROPS RESEARCH}	{192}		{118-125}	{China is the world's largest emitter of gaseous ammonia (NH3), a compound carrying severe human health and ecosystem risks. Fertilizer N application is a major source of this atmospheric NH3. Although many studies have measured NH3 emissions from croplands in China, the effect of fertilizer management on yield-scaled NH3 emissions (i.e., NH3 intensity defined as NH3 emissions per unit crop yield…
SOC not main topic of study	ex	ex			Jian, Siyang; Li, Jianwei; Chen, Ji; Wang, Gangsheng; Mayes, Melanie A.; Dzantor, Kudjo E.; Hui, Dafeng; Luo, Yiqi	Soil extracellular enzyme activities, soil carbon and nitrogen storage under nitrogen fertilization: A meta-analysis	{2016}	{OCT}	{SOIL BIOLOGY \& BIOCHEMISTRY}	{101}		{32-43}	{Nitrogen (N) fertilization affects the rate of soil organic carbon (SOC) decomposition by regulating extracellular enzyme activities (EEA). Extracellular enzymes have not been represented in global biogeochemical models. Understanding the relationships among EEA and SOC, soil N (TN), and soil microbial biomass carbon (MBC) under N fertilization would enable modeling of the influence of EEA on SO…
	ex		ex		Kaempf, Immo; Hoelzel, Norbert; Stoerrle, Maria; Broll, Gabriele; Kiehl, Kathrin	Potential of temperate agricultural soils for carbon sequestration: A meta-analysis of land-use effects	{2016}	{OCT 1}	{SCIENCE OF THE TOTAL ENVIRONMENT}	{566}		{428-435}	{Restoring depleted soil organic carbon (SOC) stocks of arable land to remove carbon from the atmosphere and offset fossil fuel emissions is a promising strategy for the mitigation of climate change. In agroecosystems conservational tillage practices and the abandonment of formerly plowed fields (ex-arable land) are shown to have the highest potential to sequester SOC. Nevertheless reported seque…
	ex			ex	Li, Weibin; Wu, Jiabing; Bai, Edith; Jin, Changjie; Wang, Anzhi; Yuan, Fenghui; Guan, Dexin	Response of terrestrial carbon dynamics to snow cover change: A meta-analysis of experimental manipulation (II)	{2016}	{DEC}	{SOIL BIOLOGY \& BIOCHEMISTRY}	{103}		{388-393}	{Snowpack in winter is very sensitive to climate change, and may in turn induce complex effects on terrestrial biochemistry processes. Here we synthesized the results from 49 papers based on snow depth manipulation experiments and conducted a meta-analysis to evaluate the general response of 9 variables related to terrestrial carbon pools and dynamics to the altered snowpack depth. Our meta-analy…
	ex			ex	Li, Hongwen; He, Jin; Bharucha, Zareen Pervez; Lal, Rattan; Pretty, Jules	Improving China's food and environmental security with conservation agriculture	{2016}	{NOV}	{INTERNATIONAL JOURNAL OF AGRICULTURAL SUSTAINABILITY}	{14}	{4}	{377-391}	{China has achieved impressive increases in agricultural output in recent decades. Yet, past approaches centred on a growing use of fertilizers, pesticides, fuel and water are not likely to achieve the required 30-50\% additional increases in food production by mid-century. We show that efficiencies of production are falling and the costs of environmental harm are increasing. Agricultural innovat…
	in				Liu, Shuwei; Zhang, Yaojun; Zong, Yajie; Hu, Zhiqiang; Wu, Shuang; Zhou, Jie; Jin, Yaguo; Zou, Jianwen	Response of soil carbon dioxide fluxes, soil organic carbon and microbial biomass carbon to biochar amendment: a meta-analysis	{2016}	{MAR}	{GLOBAL CHANGE BIOLOGY BIOENERGY}	{8}	{2}	{392-406}	{Biochar as a carbon-rich coproduct of pyrolyzing biomass, its amendment has been advocated as a potential strategy to soil carbon (C) sequestration. Updated data derived from 50 papers with 395 paired observations were reviewed using meta-analysis procedures to examine responses of soil carbon dioxide (CO2) fluxes, soil organic C (SOC), and soil microbial biomass C (MBC) contents to biochar amen…
	ex			ex	Mafongoya, Paramu; Rusinamhodzi, Leonard; Siziba, Shephard; Thierfelder, Christian; Mvumi, Brighton M.; Nhau, Brighton; Hove, Lewis; Chivenge, Pauline	Maize productivity and profitability in Conservation Agriculture systems across agro-ecological regions in Zimbabwe: A review of knowledge and practice	{2016}	{MAR 15}	{AGRICULTURE ECOSYSTEMS \& ENVIRONMENT}	{220}		{211-225}	{Conservation agriculture (CA) is increasingly promoted in southern Africa as a strategy to improve food security and reverse soil degradation in the face of climate change. However, the performance of CA under different environments and its ability to improve ecosystem services is still unclear. The effects of the CA options; direct seeding, rip-line seeding, and seeding into planting basins on …
	ex			ex	Nyawira, Sylvia S.; Nabel, Julia E. M. S.; Don, Axel; Brovkin, Victor; Pongratz, Julia	Soil carbon response to land-use change: evaluation of a global vegetation model using observational meta-analyses	{2016}	{OCT 13}	{BIOGEOSCIENCES}	{13}	{19}	{5661-5675}	{Global model estimates of soil carbon changes from past land-use changes remain uncertain. We develop an approach for evaluating dynamic global vegetation models (DGVMs) against existing observational meta-analyses of soil carbon changes following land-use change. Using the DGVM JSBACH, we perform idealized simulations where the entire globe is covered by one vegetation type, which then undergoe…
	ex			ex	Sainju, Upendra M.	A Global Meta-Analysis on the Impact of Management Practices on Net Global Warming Potential and Greenhouse Gas Intensity from Cropland Soils	{2016}	{FEB 22}	{PLOS ONE}	{11}	{2}		{Management practices, such as tillage, crop rotation, and N fertilization, may affect net global warming potential (GWP) and greenhouse gas intensity (GHGI), but their global impact on cropland soils under different soil and climatic conditions need further evaluation. Available global data from 57 experiments and 225 treatments were evaluated for individual and combined effects of tillage, crop…
	ex			ex	Schadel, Christina; Bader, Martin K. F.; Schuur, Edward A. G.; Biasi, Christina; Bracho, Rosvel; Capek, Petr; De Baets, Sarah; Diakova, Katerina; Ernakovich, Jessica; Estop-Aragones, Cristian; Graham, David E.; Hartley, Iain P.; Iversen, Colleen M.; Kane, Evan S.; Knoblauch, Christian; Lupascu, Massimo; Martikainen, Pertti J.; Natali, Susan M.; Norby, Richard J.; O'Donnell, Jonathan A.; Chowdhury…	Potential carbon emissions dominated by carbon dioxide from thawed permafrost soils	{2016}	{OCT}	{NATURE CLIMATE CHANGE}	{6}	{10}	{950+}	{Increasing temperatures in northern high latitudes are causing permafrost to thaw(1), making large amounts of previously frozen organic matter vulnerable to microbial decomposition(2). Permafrost thaw also creates a fragmented landscape of drier and wetter soil conditions(3,4) that determine the amount and form (carbon dioxide (CO2), or methane (CH4)) of carbon (C) released to the atmosphere. Th…
	ex			ex	Shi, Shengwei; Peng, Changhui; Wang, Meng; Zhu, Qiuan; Yang, Gang; Yang, Yanzheng; Xi, Tingting; Zhang, Tinglong	A global meta-analysis of changes in soil carbon, nitrogen, phosphorus and sulfur, and stoichiometric shifts after forestation	{2016}	{OCT}	{PLANT AND SOIL}	{407}	{1-2}	{323-340}	{Planted forests, established on non-forest lands, play an important role in enhancing terrestrial carbon (C) sequestration. Understanding the changes in soil C, nutrients and stoichiometry in planted forests is important for forest management. We conducted a global meta-analysis of changes in C, nitrogen (N), phosphorus (P) and sulfur (S) and their stoichiometry in mineral soils of planted fores…
	ex			ex	Sileshi, Gudeta W.	The magnitude and spatial extent of influence of Faidherbia albida trees on soil properties and primary productivity in drylands	{2016}	{SEP}	{JOURNAL OF ARID ENVIRONMENTS}	{132}		{1-14}	{Faidherbia (Faidherbia albida) is being promoted widely in interventions for combating desertification, regreening of the Sahel and agroforestry projects in dry lands. Some scientists have questioned the wisdom of its wider promotion without clear evidence of its impacts. This review provides novel analyses of the magnitude and spatial extent of its influence on soil properties and primary produ…
	ex			ex	Tashi, Sonam; Singh, Balwant; Keitel, Claudia; Adams, Mark	Soil carbon and nitrogen stocks in forests along an altitudinal gradient in the eastern Himalayas and a meta-analysis of global data	{2016}	{JUN}	{GLOBAL CHANGE BIOLOGY}	{22}	{6}	{2255-2268}	{High-altitude soils potentially store a large pool of carbon (C) and nitrogen (N). The assessment of total C and N stocks in soils is vital to understanding the C and N dynamics in terrestrial ecosystems. In this study, we examined effects of altitude and forest composition on soil C and N along a transect from 317 to 3300 m a.s.l. in the eastern Himalayas. We used meta-analysis to establish the…
	ex			ex	Thapa, Resham; Chatterjee, Amitava; Awale, Rakesh; McGranahan, Devan A.; Daigh, Aaron	Effect of Enhanced Efficiency Fertilizers on Nitrous Oxide Emissions and Crop Yields: A Meta-analysis	{2016}	{SEP-OCT}	{SOIL SCIENCE SOCIETY OF AMERICA JOURNAL}	{80}	{5}	{1121-1134}	{Enhanced efficiency fertilizers (EEFs) have the potential to reduce N2O emissions and improve crop productivity, but the impact of soil and management conditions on their effectiveness is not clear. We conducted a meta-analysis to evaluate the effectiveness of different EEF types in reducing N2O emissions in three cereal production systems: rice (Oryza sativa L.), corn (Zea mays L.), and wheat (…
	ex			ex	Trivedi, Pankaj; Delgado-Baquerizo, Manuel; Anderson, Ian C.; Singh, Brajesh K.	Response of Soil Properties and Microbial Communities to Agriculture: Implications for Primary Productivity and Soil Health Indicators	{2016}	{JUL 12}	{FRONTIERS IN PLANT SCIENCE}	{7}			{Agricultural intensification is placing tremendous pressure on the soil's capacity to maintain its functions leading to large-scale ecosystem degradation and loss of productivity in the long term. Therefore, there is an urgent need to find early indicators of soil health degradation in response to agricultural management. In recent years, major advances in soil meta-genomic and spatial studies o…
	ex			ex	Wang, Jinyang; Yan, Xiaoyuan	Denitrification in upland of China: Magnitude and influencing factors	{2016}	{DEC}	{JOURNAL OF GEOPHYSICAL RESEARCH-BIOGEOSCIENCES}	{121}	{12}	{3060-3071}	{A better understanding of influencing factors and accurate estimate of soil denitrification is a global concern. Here we present a synthesis of 300 observations of denitrification in Chinese upland soils from 39 field and laboratory studies using the acetylene inhibition technique. The results of a linear mixed model analysis showed that the rates of soil denitrification were significantly affec…
	ex			ex	Wang, Xiaoyu; McConkey, Brian G.; VandenBygaart, A. J.; Fan, Jianling; Iwaasa, Alan; Schellenberg, Mike	Grazing improves C and N cycling in the Northern Great Plains: a meta-analysis	{2016}	{SEP 12}	{SCIENTIFIC REPORTS}	{6}			{Grazing potentially alters grassland ecosystem carbon (C) and nitrogen (N) storage and cycles, however, the overall direction and magnitude of such alterations are poorly understood on the Northern Great Plains (NGP). By synthesizing data from multiple studies on grazed NGP ecosystems, we quantified the response of 30 variables to C and N pools and fluxes to grazing using a comprehensive meta-an…
	ex			ex	Xia, Longlong; Xia, Yongqiu; Ma, Shutan; Wang, Jinyang; Wang, Shuwei; Zhou, Wei; Yan, Xiaoyuan	Greenhouse gas emissions and reactive nitrogen releases from rice production with simultaneous incorporation of wheat straw and nitrogen fertilizer	{2016}	{AUG 12}	{BIOGEOSCIENCES}	{13}	{15}	{4569-4579}	{Impacts of simultaneous inputs of crop straw and nitrogen (N) fertilizer on greenhouse gas (GHG) emissions and N losses from rice production are not well understood. A 2-year field experiment was established in a rice-wheat cropping system in the Taihu Lake region (TLR) of China to evaluate the GHG intensity (GHGI) as well as reactive N intensity (NrI) of rice production with inputs of wheat str…
	ex			ex	Xiong, Dingpeng; Shi, Peili; Zhang, Xianzhou; Zou, Chris B.	Effects of grazing exclusion on carbon sequestration and plant diversity in grasslands of China A meta-analysis	{2016}	{SEP}	{ECOLOGICAL ENGINEERING}	{94}		{647-655}	{Widespread land degradation has strengthened the urgent need to restore overgrazing grasslands. China has implemented the program Returning Grazing Land to Grassland' (RGLG) through grazing exclusion by fence since 2003. Despite a lot of field experiments, there is still controversy on the effects of grazing exclusion on rangeland restoration, highlighting the need for synthetic analysis. We con…
ecosystem studied, agriculture only small part of study	ex	ex			Yue, Kai; Peng, Yan; Peng, Changhui; Yang, Wanqin; Peng, Xin; Wu, Fuzhong	Stimulation of terrestrial ecosystem carbon storage by nitrogen addition: a meta-analysis	{2016}	{JAN 27}	{SCIENTIFIC REPORTS}	{6}			{Elevated nitrogen (N) deposition alters the terrestrial carbon (C) cycle, which is likely to feed back to further climate change. However, how the overall terrestrial ecosystem C pools and fluxes respond to N addition remains unclear. By synthesizing data from multiple terrestrial ecosystems, we quantified the response of C pools and fluxes to experimental N addition using a comprehensive meta-a…
	ex			ex	Yuen, Jia Qi; Fung, Tak; Ziegler, Alan D.	Review of allometric equations for major land covers in SE Asia: Uncertainty and implications for above- and below-ground carbon estimates	{2016}	{JAN 15}	{FOREST ECOLOGY AND MANAGEMENT}	{360}		{323-340}	{Our review of biomass studies conducted for 11 Southeast Asian countries, Papua New Guinea, and southern China uncovered 402 above-ground and 138 below-ground biomass allometric equations for the following major land covers: forest, peat swamp forest, mangrove forest, logged over forest, orchard and tree plantation, rubber plantation, oil palm plantation, bamboo, swidden fallow, and grassland/pa…
	ex			ex	Zheng, Weishuang; Morris, E. Kathryn; Lehmann, Anika; Rillig, Matthias C.	Interplay of soil water repellency, soil aggregation and organic carbon. A meta-analysis	{2016}	{DEC 1}	{GEODERMA}	{283}		{39-47}	{Soil water repellency (SWR) is a widely observed phenomenon where water infiltration is delayed on the soil surface for a time before soaking in. High SWR not only causes problems in agriculture for prolonged irrigation and waste of water, but also might benefit soil by enhancing aggregate stability in post-fire, arid and seasonally dry ecosystems. For a better understanding of the mechanisms be…
	ex			ex	Achat, David L.; Fortin, Mathieu; Landmann, Guy; Ringeval, Bruno; Augusto, Laurent	Forest soil carbon is threatened by intensive biomass harvesting	{2015}	{NOV 4}	{SCIENTIFIC REPORTS}	{5}			{Forests play a key role in the carbon cycle as they store huge quantities of organic carbon, most of which is stored in soils, with a smaller part being held in vegetation. While the carbon storage capacity of forests is influenced by forestry, the long-term impacts of forest managers' decisions on soil organic carbon (SOC) remain unclear. Using a meta-analysis approach, we showed that conventio…
	ex			ex	Hoover, Coeli M.; Heath, Linda S.	A commentary on `Mineral soil carbon fluxes in forests and implications for carbon balance assessments': a deeper look at the data	{2015}	{MAR}	{GLOBAL CHANGE BIOLOGY BIOENERGY}	{7}	{2}	{362-365}	{Forestry practitioners contacted us with their concerns about a recent review article by Buchholz T, Friedland AJ, Hornig CE, Keeton WS, Zanchi G, Nunery J (2013) GCB Bioenergy who questioned the way soil carbon is treated in many models and protocols, and indicated that an increasing number of research studies showed meaningful soil organic carbon (SOC) loss as a result of forest management. We…
	ex			ex	Kim, Dong-Gill; Kirschbaum, Miko U. F.	The effect of land-use change on the net exchange rates of greenhouse gases: A compilation of estimates	{2015}	{OCT 1}	{AGRICULTURE ECOSYSTEMS \& ENVIRONMENT}	{208}		{114-126}	{One of the environmental impacts of land-use change (LUC) is a change in the net exchange of the greenhouse gases (GHGs) carbon dioxide (CO2), methane (CH4) and nitrous oxide (N2O). Here we summarize data of changes in soil organic carbon (SOC) stocks and net soil CH4 and N2O emissions associated with LUC. We combine that with estimates of biomass carbon (C) stock changes and enteric CH4 emissio…
	ex		ex		Lu, Fei	How can straw incorporation management impact on soil carbon storage? A meta-analysis	{2015}	{DEC}	{MITIGATION AND ADAPTATION STRATEGIES FOR GLOBAL CHANGE}	{20}	{8}	{1545-1568}	{Straw incorporation (SI) is a common practice in China and has important implications for agricultural sustainability. This study aimed to quantitatively summarise the response of top soil (0-20 cm) carbon (C) to SI under different agricultural management regimes. Results indicated that compared with straw removal (SR), SI significantly increased soil C storage by 12 \%. Moreover, incorporation …
	ex			ex	Lundy, Mark E.; Pittelkow, Cameron M.; Linquist, Bruce A.; Liang, Xinqiang; van Groenigen, Kees Jan; Lee, Juhwan; Six, Johan; Venterea, Rodney T.; van Kessel, Chris	Nitrogen fertilization reduces yield declines following no-till adoption	{2015}	{NOV}	{FIELD CROPS RESEARCH}	{183}		{204-210}	{Conservation agriculture (CA) has been promoted as a method of sustainable intensification and climate change mitigation and is being widely practiced and implemented globally. However, no-till (NT), a fundamental component of CA, has been shown to reduce yields in many cases. In order to maintain yields following adoption of CA, it has been recently suggested that fertilizer application should …
	ex			ex	Mangalassery, S.; Sjoegersten, S.; Sparkes, D. L.; Mooney, S. J.	Examining the potential for climate change mitigation from zero tillage	{2015}	{SEP}	{JOURNAL OF AGRICULTURAL SCIENCE}	{153}	{7}	{1151-1173}	{The benefits of reduced and zero-tillage systems have been presented as reducing runoff, enhancing water retention and preventing soil erosion. There is also general agreement that the practice can conserve and enhance soil organic carbon (C) levels to some extent. However, their applicability in mitigating climate change has been debated extensively, especially when the whole profile of C in th…
	ex			ex	Moroni, M. T.; Morris, D. M.; Shaw, C.; Stokland, J. N.; Harmon, M. E.; Fenton, N. J.; Merganicova, K.; Merganic, J.; Okabe, K.; Hagemann, U.	Buried Wood: A Common Yet Poorly Documented Form of Deadwood	{2015}	{JUN}	{ECOSYSTEMS}	{18}	{4}	{605-628}	{Buried wood (BW: downed deadwood buried more than 50\% by soil, litter, or ground vegetation) is a common but understudied part of forest ecosystems. We reviewed the literature and conducted a meta-analysis of BW that included new data from Australia, Belarus, Canada, Germany, Japan, Norway, Russia, Slovakia, Sweden, the USA, and Wales. Buried wood occurred in a wide range of forest types of nat…
	ex			ex	Nayak, Dali; Saetnan, Eli; Cheng, Kun; Wang, Wen; Koslowski, Frank; Cheng, Yan-Fen; Zhu, Wei Yun; Wang, Jia-Kun; Liu, Jian-Xin; Moran, Dominic; Yan, Xiaoyuan; Cardenas, Laura; Newbold, Jamie; Pan, Genxing; Lui, Yuelai; Smith, Pete	Management opportunities to mitigate greenhouse gas emissions from Chinese agriculture	{2015}	{NOV 1}	{AGRICULTURE ECOSYSTEMS \& ENVIRONMENT}	{209}	{SI}	{108-124}	{Agriculture accounts for approximately 11\% of China's national greenhouse gas (GHG) emissions. Through adoption of region-specific best management practices, Chinese farmers can contribute to emission reduction while maintaining food security for its large population (>1300 Million). This paper presents the outcome of a bottom-up assessment to quantify technical potential of mitigation measures…
	ex			ex	Pittelkow, Cameron M.; Linquist, Bruce A.; Lundy, Mark E.; Liang, Xinqiang; van Groenigen, Kees Jan; Lee, Juhwan; van Gestel, Natasja; Six, Johan; Venterea, Rodney T.; van Kessel, Chris	When does no-till yield more? A global meta-analysis	{2015}	{NOV}	{FIELD CROPS RESEARCH}	{183}		{156-168}	{No-till agriculture represents a relatively widely adopted management system that aims to reduce soil erosion, decrease input costs, and sustain long-term crop productivity. However, its impacts on crop yields are variable, and an improved understanding of the factors limiting productivity is needed to support evidence-based management decisions. We conducted a global meta-analysis to evaluate t…
	ex		ex		Pittelkow, Cameron M.; Liang, Xinqiang; Linquist, Bruce A.; van Groenigen, Kees Jan; Lee, Juhwan; Lundy, Mark E.; van Gestel, Natasja; Six, Johan; Venterea, Rodney T.; van Kessel, Chris	Productivity limits and potentials of the principles of conservation agriculture	{2015}	{JAN 15}	{NATURE}	{517}	{7534}	{365-U482}	{One of the primary challenges of our time is to feed a growing and more demanding world population with reduced external inputs and minimal environmental impacts, all under more variable and extreme climate conditions in the future(1-4). Conservation agriculture represents a set of three crop management principles that has received strong international support to help address this challenge(5,6)…
	ex			ex	Ponisio, Lauren C.; M'Gonigle, Leithen K.; Mace, Kevi C.; Palomino, Jenny; de Valpine, Perry; Kremen, Claire	Diversification practices reduce organic to conventional yield gap	{2015}	{JAN 22}	{PROCEEDINGS OF THE ROYAL SOCIETY B-BIOLOGICAL SCIENCES}	{282}	{1799}		{Agriculture today places great strains on biodiversity, soils, water and the atmosphere, and these strains will be exacerbated if current trends in population growth, meat and energy consumption, and food waste continue. Thus, farming systems that are both highly productive and minimize environmental harms are critically needed. How organic agriculture may contribute to world food production has…
	ex			ex	Tiwari, Rakesh; Kritee, K.; Adhya, Tapan K.; Loecke, Terry; Rudek, Joe; Nair, Drishya; Ahuja, Richie; Balireddygari, Shalini; Balakrishna, Somashekar; Ram, Karthik; Venkataiah, Leelavathi C.; Dava, Obulapathi; Madasamy, Murugan; Salai, Abhilash	Sampling guidelines and analytical optimization for direct greenhouse gas emissions from tropical rice and upland cropping systems	{2015}	{JUL 4}	{CARBON MANAGEMENT}	{6}	{3-4}	{169-184}	{We describe a modified manual closed-chamber approach with detachable lid and vertically stackable chambers for sampling followed by simultaneous analysis of nitrous oxide (N2O) and methane (CH4) for measuring greenhouse gas flux from rice and upland cropping systems in peninsular India. A meta-analysis of leading internationally/regionally recommended approaches to monitor agricultural GHG emis…
	ex			ex	Yayneshet, T.; Treydte, A. C.	A meta-analysis of the effects of communal livestock grazing on vegetation and soils in sub-Saharan Africa	{2015}	{MAY}	{JOURNAL OF ARID ENVIRONMENTS}	{116}		{18-24}	{Extensive livestock grazing is one of the most common and widespread forms of land uses in sub Saharan Africa (SSA). Studies assessing the effects of extensive livestock grazing on vegetation and soils in SSA are inconsistent in the direction and magnitude of study outcomes. We applied meta-analysis to identify whether studies so far conducted in the rangeland systems of SSA have detected signif…
	ex			ex	Zhao, Hong; Sun, Binfeng; Lu, Fei; Zhang, Guo; Wang, Xiaoke; Ouyang, Zhiyun	Straw Incorporation Strategy on Cereal Crop Yield in China	{2015}	{JUL-AUG}	{CROP SCIENCE}	{55}	{4}	{1773-1781}	{Straw incorporation (SI) is considered a valid agricultural measure for ameliorating soil quality and sequestrating soil C. This study aimed to quantitatively summarize the response of cereal yield to SI management. Our results showed that compared with straw removal, SI could significantly enhance cereal yield by 7\% over all of China across the 9-yr period. In all regions, SI in coarse-texture…
	ex			ex	Zhao, Xin; Zhang, Ran; Xue, Jian-Fu; Pu, Chao; Zhang, Xiang-Qian; Liu, Sheng-Li; Chen, Fu; Lal, Rattan; Zhang, Hai-Lin	Management-Induced Changes to Soil Organic Carbon in China: A Meta-analysis	{2015}			{134}		{1-50}	{Soil carbon (C) sequestration is an environmentally friendly and efficient strategy to offset emissions of greenhouse gases and mitigate climate change. However, inappropriate farming practices can deplete soil organic carbon (SOC) stock and degrade soil quality. Thus, we conducted a meta-analysis to assess and identify the effects of improved farming practices on SOC sequestration in China by c…
	ex			ex	Zhu, Liqun; Li, Jing; Tao, Baorui; Hu, Naijuan	Effect of different fertilization modes on soil organic carbon sequestration in paddy fields in South China: A meta-analysis	{2015}	{JUN}	{ECOLOGICAL INDICATORS}	{53}		{144-153}	{Evidences have shown that fertilizer application could affect soil organic carbon (SOC) content in cropland. South China is the main production region of rice, in which many different fertilization practices have been widely used during the last several decades, but the effect of different fertilization modes on SOC sequestration in paddy fields in this region was scarcely studied. Based on 274 …
	ex			ex	Barcena, T. G.; Kiaer, L. P.; Vesterdal, L.; Stefansdottir, H. M.; Gundersen, P.; Sigurdsson, B. D.	Soil carbon stock change following afforestation in Northern Europe: a meta-analysis	{2014}	{AUG}	{GLOBAL CHANGE BIOLOGY}	{20}	{8}	{2393-2405}	{Northern Europe supports large soil organic carbon (SOC) pools and has been subjected to high frequency of land-use changes during the past decades. However, this region has not been well represented in previous large-scale syntheses of land-use change effects on SOC, especially regarding effects of afforestation. Therefore, we conducted a meta-analysis of SOC stock change following afforestatio…
	ex			ex	Bayramzadeh, Vilma	Does tree species composition control the soil carbon stocks of the Hyrcanian forest in the Northern Iran? (A case study in Guilan province, Iran)	{2014}	{MAR}	{JOURNAL OF FORESTRY RESEARCH}	{25}	{1}	{143-146}	{This work studied the effects of tree species composition on soil carbon storage in five mixed stands dominated by oriental beech and grown in the western Caspian region in Guilan province, called Astara, Asalem, Fuman, Chere and Shenrud. The thickness of the litter layer, soil characteristics, tree composition and percentage of canopy coverage were measured in each stand. Total soil organic car…
	ex			ex	Buckingham, S.; Anthony, S.; Bellamy, P. H.; Cardenas, L. M.; Higgins, S.; McGeough, K.; Topp, C. F. E.	Review and analysis of global agricultural N2O emissions relevant to the UK	{2014}	{JUL 15}	{SCIENCE OF THE TOTAL ENVIRONMENT}	{487}		{164-172}	{As part of a UK government funded research project to update the UK N2O inventory methodology, a systematic review of published nitrous oxide (N2O) emission factors was carried out of non-UK research, for future comparison and synthesis with the UK measurement based evidence base. The aim of the study is to assess how the UK IPCC default emission factor for N2O emissions derived from synthetic o…
	ex			ex	Congreves, Katelyn A.; Smith, Jillian M.; Nemeth, Deanna D.; Hooker, David C.; Van Eerd, Laura L.	Soil organic carbon and land use: Processes and potential in Ontario's long-term agro-ecosystem research sites	{2014}	{AUG}	{CANADIAN JOURNAL OF SOIL SCIENCE}	{94}	{3}	{317-336}	{Soil organic carbon (SOC) is crucial for maintaining a productive agro- ecosystem. Long- term research must be synthesized to understand the effects of land management on SOC storage and to develop best practices to prevent soil degradation. Therefore, this review compiled an inventory of long- term Ontario studies and assessed SOC storage under common Ontario land management regimes via a meta-…
	ex			ex	DiRocco, Tara L.; Ramage, Benjamin S.; Evans, Samuel G.; Potts, Matthew D.	Accountable Accounting: Carbon-Based Management on Marginal Lands	{2014}	{APR}	{FORESTS}	{5}	{4}	{847-861}	{Substantial discussion exists concerning the best land use options for mitigating greenhouse gas (GHG) emissions on marginal land. Emissions-mitigating land use options include displacement of fossil fuels via biofuel production and afforestation. Comparing C recovery dynamics under these different options is crucial to assessing the efficacy of offset programs. In this paper, we focus on forest…
	ex			ex	Geisseler, Daniel; Scow, Kate M.	Long-term effects of mineral fertilizers on soil microorganisms - A review	{2014}	{AUG}	{SOIL BIOLOGY \& BIOCHEMISTRY}	{75}		{54-63}	{Increasing nutrient inputs into terrestrial ecosystems affect not only plant communities but also associated soil microbial communities. Studies carried out in predominantly unmanaged ecosystems have found that increasing nitrogen (N) inputs generally decrease soil microbial biomass; less is known about long-term impacts in managed systems such as agroecosystems. The objective of this paper was …
	ex			ex	van Groenigen, Jan Willem; Lubbers, Ingrid M.; Vos, Hannah M. J.; Brown, George G.; De Deyn, Gerlinde B.; van Groenigen, Kees Jan	Earthworms increase plant production: a meta-analysis	{2014}	{SEP 15}	{SCIENTIFIC REPORTS}	{4}			{To meet the challenge of feeding a growing world population with minimal environmental impact, we need comprehensive and quantitative knowledge of ecological factors affecting crop production. Earthworms are among the most important soil dwelling invertebrates. Their activity affects both biotic and abiotic soil properties, in turn affecting plant growth. Yet, studies on the effect of earthworm …
	ex			ex	Hergoualc'h, K.; Verchot, L. V.	Greenhouse gas emission factors for land use and land-use change in Southeast Asian peatlands	{2014}	{AUG}	{MITIGATION AND ADAPTATION STRATEGIES FOR GLOBAL CHANGE}	{19}	{6}	{789-807}	{Tropical peat swamp forests, which are predominantly located in Southeast Asia (SEA) and play a prominent role as a global carbon store, are being intensively degraded and converted to agricultural lands and tree plantations. For national inventories, updated estimates of peat emissions of greenhouse gases (GHG) from land use (LU) and land-use change in the tropics are required. In this context,…
upland and paddy soils only	ex	ex			Liu, Chang; Lu, Meng; Cui, Jun; Li, Bo; Fang, Changming	Effects of straw carbon input on carbon dynamics in agricultural soils: a meta-analysis	{2014}	{MAY}	{GLOBAL CHANGE BIOLOGY}	{20}	{5}	{1366-1381}	{Straw return has been widely recommended as an environmentally friendly practice to manage carbon (C) sequestration in agricultural ecosystems. However, the overall trend and magnitude of changes in soil C in response to straw return remain uncertain. In this meta-analysis, we calculated the response ratios of soil organic C (SOC) concentrations, greenhouse gases (GHGs) emission, nutrient conten…
review article	ex	ex			Lorenz, Klaus; Lal, Rattan	Biochar application to soil for climate change mitigation by soil organic carbon sequestration	{2014}	{OCT}	{JOURNAL OF PLANT NUTRITION AND SOIL SCIENCE}	{177}	{5}	{651-670}	{Pyrogenic carbon (C) is produced by incomplete combustion of fuels including organic matter (OM). Certain ranges in the combustion continuum are termed `black carbon' (BC). Because of its assumed persistence, surface soils in large parts of the world contain BC with up to 80\% of surface soil organic C (SOC) stocks and up to 32\% of subsoil SOC in agricultural soils consisting of BC. High SOC st…
	in				Maillard, Emilie; Angers, Denis A.	Animal manure application and soil organic carbon stocks: a meta-analysis	{2014}	{FEB}	{GLOBAL CHANGE BIOLOGY}	{20}	{2}	{666-679}	{The impact of animal manure application on soil organic carbon (SOC) stock changes is of interest for both agronomic and environmental purposes. There is a specific need to quantify SOC change for use in national greenhouse gas (GHG) emission inventories. We quantified the response of SOC stocks to manure application from a large worldwide pool of individual studies and determined the impact of …
	ex			ex	Obade, Vincent de Paul; Lal, Rattan	Using meta-analyses to assess pedo-variability under different land uses and soil management in central Ohio, USA	{2014}	{NOV}	{GEODERMA}	{232}		{56-68}	{The conflicting information on the impacts of management on spatial and temporal soil quality changes necessitates a comprehensive approach that can combine soil property data into a credible soil quality index. Thus, a field study was conducted to demonstrate an application of meta-analytic methods to integrate and quantitatively describe the effects of management practices on key soil physical…
	ex			ex	Zhao, Zhigan; Wang, Enli; Xue, Lihua; Wu, Yongcheng; Zang, Hecang; Qin, Xin; Zhang, Jingting; Wang, Zhimin	Accuracy of root modelling and its impact on simulated wheat yield and carbon cycling in soil	{2014}	{AUG 15}	{FIELD CROPS RESEARCH}	{165}	{SI}	{99-110}	{Accurate modelling of root biomass and root distribution of crop plants has become increasingly important in order to address issues related to carbon sequestration in soil and resource use efficiency of crops under different environmental and management conditions. However, the performance of crop models for simulating crop root system has been rarely tested in many environments due to lack of …
	in				Aguilera, Eduardo; Lassaletta, Luis; Gattinger, Andreas; Gimeno, Benjamin S.	Managing soil carbon for climate change mitigation and adaptation in Mediterranean cropping systems: A meta-analysis	{2013}	{MAR 15}	{AGRICULTURE ECOSYSTEMS \& ENVIRONMENT}	{168}		{25-36}	{Mediterranean croplands are seasonally dry agroecosystems with low soil organic carbon (SOC) content and high risk of land degradation and desertification. The increase in SOC is of special interest in these systems, as it can help to build resilience for climate change adaptation while contributing to mitigate global warming through the sequestration of atmospheric carbon (C). We compared SOC c…
	ex			ex	Aguilera, Eduardo; Lassaletta, Luis; Sanz-Cobena, Alberto; Garnier, Josette; Vallejo, Antonio	The potential of organic fertilizers and water management to reduce N2O emissions in Mediterranean climate cropping systems. A review	{2013}	{JAN 1}	{AGRICULTURE ECOSYSTEMS \& ENVIRONMENT}	{164}		{32-52}	{Environmental problems related to the use of synthetic fertilizers and to organic waste management have led to increased interest in the use of organic materials as an alternative source of nutrients for crops, but this is also associated with N2O emissions. There has been an increasing amount of research into the effects of using different types of fertilization on N2O emissions under Mediterra…
	ex			ex	Ameloot, N.; Graber, E. R.; Verheijen, F. G. A.; De Neve, S.	Interactions between biochar stability and soil organisms: review and research needs	{2013}	{AUG}	{EUROPEAN JOURNAL OF SOIL SCIENCE}	{64}	{4}	{379-390}	{The stability of biochar in soils is the cornerstone of the burgeoning worldwide interest in the potential of the pyrolysis/biochar platform for carbon (C) sequestration. While biochar is more recalcitrant in soil than the original organic feedstock, an increasing number of studies report greater C-mineralization in soils amended with biochar than in unamended soils. Soil organisms are believed …
	ex			ex	van Kessel, Chris; Venterea, Rodney; Six, Johan; Adviento-Borbe, Maria Arlene; Linquist, Bruce; van Groenigen, Kees Jan	Climate, duration, and N placement determine N2O emissions in reduced tillage systems: a meta-analysis	{2013}	{JAN}	{GLOBAL CHANGE BIOLOGY}	{19}	{1}	{33-44}	{No-tillage and reduced tillage (NT/RT) management practices are being promoted in agroecosystems to reduce erosion, sequester additional soil C and reduce production costs. The impact of NT/RT on N2O emissions, however, has been variable with both increases and decreases in emissions reported. Herein, we quantitatively synthesize studies on the short- and long-term impact of NT/RT on N2O emissio…
	ex			ex	Linquist, Bruce A.; Liu, Lijun; van Kessel, Chris; van Groenigen, Kees Jan	Enhanced efficiency nitrogen fertilizers for rice systems: Meta-analysis of yield and nitrogen uptake	{2013}	{DEC}	{FIELD CROPS RESEARCH}	{154}		{246-254}	{Nitrogen is deficient in most soils and is applied in the greatest quantities of all nutrients. Given its high potential for loss, efficient fertilizer N management has both economic and environmental consequences. Enhanced efficiency nitrogen fertilizers (EENF) have been developed to decrease N losses and improve N use efficiency. However, studies evaluating the effectiveness of EENF products i…
	ex			ex	Martin, Philip A.; Newton, Adrian C.; Bullock, James M.	Carbon pools recover more quickly than plant biodiversity in tropical secondary forests	{2013}	{DEC 22}	{PROCEEDINGS OF THE ROYAL SOCIETY B-BIOLOGICAL SCIENCES}	{280}	{1773}		{Although increasing efforts are being made to restore tropical forests, little information is available regarding the time scales required for carbon and plant biodiversity to recover to the values associated with undisturbed forests. To address this knowledge gap, we carried out a meta-analysis comparing data from more than 600 secondary tropical forest sites with nearby undisturbed reference f…
	ex			ex	Mcsherry, Megan E.; Ritchie, Mark E.	Effects of grazing on grassland soil carbon: a global review	{2013}	{MAY}	{GLOBAL CHANGE BIOLOGY}	{19}	{5}	{1347-1357}	{Soils of grasslands represent a large potential reservoir for storing CO2, but this potential likely depends on how grasslands are managed for large mammal grazing. Previous studies found both strong positive and negative grazing effects on soil organic carbon (SOC) but explanations for this variation are poorly developed. Expanding on previous reviews, we performed a multifactorial meta-analysi…
	ex			ex	Shi, Shengwei; Zhang, Wen; Zhang, Ping; Yu, Yongqiang; Ding, Fan	A synthesis of change in deep soil organic carbon stores with afforestation of agricultural soils	{2013}	{MAY 15}	{FOREST ECOLOGY AND MANAGEMENT}	{296}		{53-63}	{Afforestation is known as an available mitigation activity to climate change because it causes sequestration of CO2 from the atmosphere and stores it as the living biomass and the dead organic matter. However, the response of soil organic carbon (SOC) to afforestation in deep soil layers is still poorly understood. We surveyed previously published literature for changes in deep SOC (defined as a…
	ex			ex	ShuTao, Chen; Yao, Huang; Wei, Xie; JianWen, Zou; YanYu, Lu; ZhengHua, Hu	A new estimate of global soil respiration from 1970 to 2008	{2013}	{NOV}	{CHINESE SCIENCE BULLETIN}	{58}	{33}	{4153-4160}	{Soil respiration (R (s)) is one of the key processes that underline our understanding of carbon cycle in terrestrial ecosystems. Great uncertainty remains in the previous global R (s) estimates with a difference of 70 Pg C a(-1) between the highest and lowest estimates. Thus, the present study aimed to estimate the global annual R (s) and investigate the interannual and spatial variability in gl…
	ex			ex	Zhang, Yu-Qing; Liu, Jia-Bin; Jia, Xin; Qin, Shu-Gao	Soil Organic Carbon Accumulation in Arid and Semiarid Areas after Afforestation: a Meta-Analysis	{2013}		{POLISH JOURNAL OF ENVIRONMENTAL STUDIES}	{22}	{2}	{611-620}	{The rate and factors determining changes in the soil carbon pool after afforestation are still poorly understood, especially in arid and semiarid areas. This paper provides a review of the influence effect of afforestation on soil organic carbon (SOC) stocks based on a meta-analysis of 37 publications (including a total of 116 observations in the past 10 years), with the aim of exploring the maj…
	ex			ex	Cheng, Lei; Booker, Fitzgerald L.; Tu, Cong; Burkey, Kent O.; Zhou, Lishi; Shew, H. David; Rufty, Thomas W.; Hu, Shuijin	Arbuscular Mycorrhizal Fungi Increase Organic Carbon Decomposition Under Elevated CO2	{2012}	{AUG 31}	{SCIENCE}	{337}	{6098}	{1084-1087}	{The extent to which terrestrial ecosystems can sequester carbon to mitigate climate change is a matter of debate. The stimulation of arbuscular mycorrhizal fungi (AMF) by elevated atmospheric carbon dioxide (CO2) has been assumed to be a major mechanism facilitating soil carbon sequestration by increasing carbon inputs to soil and by protecting organic carbon from decomposition via aggregation. …
	in				Gonzalez-Sanchez, E. J.; Ordonez-Fernandez, R.; Carbonell-Bojollo, R.; Veroz-Gonzalez, O.; Gil-Ribes, J. A.	Meta-analysis on atmospheric carbon capture in Spain through the use of conservation agriculture	{2012}	{JUN}	{SOIL \& TILLAGE RESEARCH}	{122}		{52-60}	{Conservation agriculture (CA) helps to mitigate climate change. Firstly, the modifications introduced by CA on the carbon dynamics in the soil directly result in an increase of the carbon (C) in the soil fraction. Secondly, CA drastically reduces C oxidation processes by diminishing the mechanical manipulation of the soil. Spain's position in relation to the Kyoto Protocol must be improved, as i…
	ex			ex	Grace, Peter R.; Antle, John; Aggarwal, P. K.; Ogle, Stephen; Paustian, Keith; Basso, Bruno	Soil carbon sequestration and associated economic costs for farming systems of the Indo-Gangetic Plain: A meta-analysis	{2012}	{JAN 1}	{AGRICULTURE ECOSYSTEMS \& ENVIRONMENT}	{146}	{1}	{137-146}	{Soil organic carbon sequestration rates over 20 years based on the Intergovernmental Panel for Climate Change (IPCC) methodology were combined with local economic data to determine the potential for soil C sequestration in wheat-based production systems on the Indo-Gangetic Plain (IGP). The C sequestration potential of rice-wheat systems of India on conversion to no-tillage is estimated to be 44…
	ex			ex	Prietzel, Joerg; Bachmann, Sven	Changes in soil organic C and N stocks after forest transformation from Norway spruce and Scots pine into Douglas fir, Douglas fir/spruce, or European beech stands at different sites in Southern Germany	{2012}	{APR 1}	{FOREST ECOLOGY AND MANAGEMENT}	{269}		{134-148}	{At 18 sites in Bavaria (Germany) with substantial difference in elevation, parent material, climate, and stand age, which encompass most variance of site properties to be found in Central Europe, the effects of a replacement of Norway spruce (Picea abies L Karst.; 16 sites) or Scots pine (Pin us sylvestris L; two sites) by Douglas fir (Pseudotsuga menziesii, spp. menziesii) and European beech (F…
	in				Virto, Inigo; Barre, Pierre; Burlot, Aurelien; Chenu, Claire	Carbon input differences as the main factor explaining the variability in soil organic C storage in no-tilled compared to inversion tilled agrosystems	{2012}	{APR}	{BIOGEOCHEMISTRY}	{108}	{1-3}	{17-26}	{Conversion to no-till (NT) is usually associated to increased soil organic carbon (SOC) stocks in comparison to inversion tillage (IT). However, an important and unexplained variability in the changes in SOC with NT adoption exists, which impedes accurate prediction of its potential for C sequestration. We performed a meta-analysis with pedo-climatic and crop factors observed to influence SOC st…
	ex			ex	Wang, Tao; Brender, Pierre; Ciais, Philippe; Piao, Shilong; Mahecha, Miguel D.; Chevallier, Frederic; Reichstein, Markus; Ottle, Catherine; Maignan, Fabienne; Arain, Altaf; Bohrer, Gil; Cescatti, Alessandro; Kiely, Gerard; Law, Beverly Elizabeth; Lutz, Merbold; Montagnani, Leonardo; Moors, Eddy; Osborne, Bruce; Panferov, Oleg; Papale, Dario; Vaccari, Francesco Primo	State-dependent errors in a land surface model across biomes inferred from eddy covariance observations on multiple timescales	{2012}	{NOV 10}	{ECOLOGICAL MODELLING}	{246}		{11-25}	{Characterization of state-dependent model biases in land surface models can highlight model deficiencies, and provide new insights into model development. In this study, artificial neural networks (ANNs) are used to estimate the state-dependent biases of a land surface model (ORCHIDEE: ORganising Carbon and Hydrology in Dynamic EcosystEms). To characterize state-dependent biases in ORCHIDEE, we …
	ex			ex	Chivenge, Pauline; Vanlauwe, Bernard; Six, Johan	Does the combined application of organic and mineral nutrient sources influence maize productivity? A meta-analysis	{2011}	{MAY}	{PLANT AND SOIL}	{342}	{1-2}	{1-30}	{The combined application of organic resources (ORs) and mineral fertilizers is increasingly gaining recognition as a viable approach to address soil fertility decline in sub-Saharan Africa (SSA). We conducted a meta-analysis to provide a comprehensive and quantitative synthesis of conditions under which ORs, N fertilizers, and combined ORs with N fertilizers positively or negatively influence Ze…
	ex			ex	Clark, J. D.; Johnson, A. H.	Carbon and Nitrogen Accumulation in Post-Agricultural Forest Soils of Western New England	{2011}	{JUL}	{SOIL SCIENCE SOCIETY OF AMERICA JOURNAL}	{75}	{4}	{1530-1542}	{The agricultural history of New England is reflected in the species composition, biomass, and productivity of the second-growth forests of the region. There are also effects of agricultural use on soil morphology, soil organic C (SOC) and N content, erosion status, and C stability, which can be specific to site-level characteristics or prior agricultural use. We conducted a survey of SOC amounts…
	ex		ex		Don, Axel; Schumacher, Jens; Freibauer, Annette	Impact of tropical land-use change on soil organic carbon stocks - a meta-analysis	{2011}	{APR}	{GLOBAL CHANGE BIOLOGY}	{17}	{4}	{1658-1670}	{Land-use changes are the second largest source of human-induced greenhouse gas emission, mainly due to deforestation in the tropics and subtropics. CO(2) emissions result from biomass and soil organic carbon (SOC) losses and may be offset with afforestation programs. However, the effect of land-use changes on SOC is poorly quantified due to insufficient data quality (only SOC concentrations and …
	ex			ex	Ghafoor, Abdul; Moeys, Julien; Stenstrom, John; Tranter, Grant; Jarvis, Nicholas J.	Modeling Spatial Variation in Microbial Degradation of Pesticides in Soil	{2011}	{AUG 1}	{ENVIRONMENTAL SCIENCE \& TECHNOLOGY}	{45}	{15}	{6411-6419}	{Currently, no general guidance is available on suitable approaches for dealing with spatial variation in the first-order pesticide degradation rate constant k even though it is a very sensitive parameter and often highly variable at the field, catchment, and regional scales. Supported by some mechanistic reasoning, we propose a simple general modeling approach to predict k from the sorption cons…
	ex			ex	Zhang, Jianbiao; Shangguan, Tieliang; Meng, Ziqiang	Changes in soil carbon flux and carbon stock over a rotation of poplar plantations in northwest China	{2011}	{JAN}	{ECOLOGICAL RESEARCH}	{26}	{1}	{153-161}	{Forest soil is a major component of terrestrial ecosystems for carbon sequestration and plays an important role in the global carbon cycle. Soil carbon flux and soil carbon pools were investigated in a poplar plantation chronosequence over a rotation in northwest China. Based on continuous field observation in 2007, the results showed that mean soil CO(2) efflux rate was 5.54, 4.81, and 3.93 mu …
	ex			ex	Akinnifesi, Festus K.; Ajayi, O. C.; Sileshi, G.; Chirwa, P. W.; Chianu, Jonas	Fertiliser trees for sustainable food security in the maize-based production systems of East and Southern Africa. A review	{2010}	{JUL-SEP}	{AGRONOMY FOR SUSTAINABLE DEVELOPMENT}	{30}	{3}	{615-629}	{The negative effects of soil fertility depletion on food security, especially among smallholder farmers in Africa, is of economic importance, and may be worsened by climate change and rising global fertiliser prices. Substantial efforts and investment have gone into development of alternative soil fertility management options. These include vigorous research and development of N-fixing plants or…
	ex			ex	Laganiere, Jerome; Angers, Denis A.; Pare, David	Carbon accumulation in agricultural soils after afforestation: a meta-analysis	{2010}	{JAN}	{GLOBAL CHANGE BIOLOGY}	{16}	{1}	{439-453}	{Deforestation usually results in significant losses of soil organic carbon (SOC). The rate and factors determining the recovery of this C pool with afforestation are still poorly understood. This paper provides a review of the influence of afforestation on SOC stocks based on a meta-analysis of 33 recent publications (totaling 120 sites and 189 observations), with the aim of determining the fact…
	ex			ex	Lee, Mark; Manning, Pete; Rist, Janna; Power, Sally A.; Marsh, Charles	A global comparison of grassland biomass responses to CO2 and nitrogen enrichment	{2010}	{JUL 12}	{PHILOSOPHICAL TRANSACTIONS OF THE ROYAL SOCIETY B-BIOLOGICAL SCIENCES}	{365}	{1549}	{2047-2056}	{Grassland ecosystems cover vast areas of the Earth's surface and provide many ecosystem services including carbon (C) storage, biodiversity preservation and the production of livestock forage. Predicting the future delivery of these services is difficult, because widespread changes in atmospheric CO2 concentration, climate and nitrogen (N) inputs are expected. We compiled published data from glo…
	in				Luo, Zhongkui; Wang, Enli; Sun, Osbert J.	Can no-tillage stimulate carbon sequestration in agricultural soils? A meta-analysis of paired experiments	{2010}	{OCT 15}	{AGRICULTURE ECOSYSTEMS \& ENVIRONMENT}	{139}	{1-2}	{224-231}	{Adopting no-tillage in agro-ecosystems has been widely recommended as a means of enhancing carbon (C) sequestration in soils. However, study results are inconsistent and varying from significant increase to significant decrease. It is unclear whether this variability is caused by environmental, or management factors or by sampling errors and analysis methodology. Using meta-analysis, we assessed…
	ex			ex	Marco, Phidias; Henry, Matieu; Blavet, Didier; Bernoux, Martial	VARIATION IN ORGANIC CARBON STOCKS IN SOILS AFTER FOREST PLANTING: META-ANALYSIS ATTEMPT COVERING SEVERAL SITUATIONS IN LATIN AMERICA	{2010}		{BOIS ET FORETS DES TROPIQUES}		{305}	{21-32}	{Soils make up the largest carbon reservoir, since they contain twice as much carbon as the atmosphere and almost three times as much as the biomass of aerial and root systems. Even a slight variation in soil carbon stocks can have significant consequences for atmospheric CO, concentrations. The aim of this study is to investigate the influence of forest planting in Latin America on organic carbo…
	ex			ex	Rui, Wenyi; Zhang, Weijian	Effect size and duration of recommended management practices on carbon sequestration in paddy field in Yangtze Delta Plain of China: A meta-analysis	{2010}	{JAN 31}	{AGRICULTURE ECOSYSTEMS \& ENVIRONMENT}	{135}	{3}	{199-205}	{Increasing evidence has shown that recommended management practices (RMPs) benefit carbon sequestration in cropland soils, but the differences in the effect size and duration between RMPs are not well documented, especially in paddy fields where multiple cropping systems are in use. In order to select feasible techniques and develop effective strategies for soil organic carbon (SOC) management f…
	ex			ex	Sileshi, Gudeta; Akinnifesi, Festus K.; Debusho, Legesse K.; Beedy, Tracy; Ajayi, Oluyede C.; Mong'omba, Simon	Variation in maize yield gaps with plant nutrient inputs, soil type and climate across sub-Saharan Africa	{2010}	{MAR 3}	{FIELD CROPS RESEARCH}	{116}	{1-2}	{1-13}	{Despite the number of site-specific studies conducted on the effect of inorganic fertilizer and organic inputs on maize yield, information is lacking on the variation in yield risks with soils and climate in sub-Saharan Africa (SSA). Information on yield risk could give an idea of where a particular input may not work well, and thus has low potential for adoption by farmers. Using analytical met…
	ex			ex	Fierer, Noah; Strickland, Michael S.; Liptzin, Daniel; Bradford, Mark A.; Cleveland, Cory C.	Global patterns in belowground communities	{2009}	{NOV}	{ECOLOGY LETTERS}	{12}	{11}	{1238-1249}	{Although belowground ecosystems have been studied extensively and soil biota play integral roles in biogeochemical processes, surprisingly we have a limited understanding of global patterns in belowground biomass and community structure. To address this critical gap, we conducted a meta-analysis of published data (> 1300 datapoints) to compare belowground plant, microbial and faunal biomass acro…
	in				Angers, D. A.; Eriksen-Hamel, N. S.	Full-inversion tillage and organic carbon distribution in soil profiles: A meta-analysis	{2008}	{SEP-OCT}	{SOIL SCIENCE SOCIETY OF AMERICA JOURNAL}	{72}	{5}	{1370-1374}	{While the adoption of no-till (NT) usually leads to the accumulation of soil organic C (SOC) in the surface soil layers, a number Of Studies have shown that this effect is sometimes partly or completely offset by greater SOC content near the bottom of the plow layer under full-inversion tillage (FIT). Our purpose was to review the literature in which SOC profiles have been measured under paired …
	ex			ex	Denno, Robert F.; Gruner, Daniel S.; Kaplan, Ian	Potential for Entomopathogenic Nematodes in Biological Control: A Meta-Analytical Synthesis and Insights from Trophic Cascade Theory	{2008}	{JUN}	{JOURNAL OF NEMATOLOGY}	{40}	{2}	{61-72}	{Entomopathogenic nematodes (EPN) are ubiquitous and generalized consumers of insects in soil food webs, occuring widely in natural and agricultural ecosystems on six continents. Augmentative releases of EPN have been used to enhance biological control of pests in agroecosystems. Pest managers strive to achieve a trophic cascade whereby natural-enemy effects permeate down throguh the food web to …
	ex			ex	Sileshi, Gudeta; Akinnifesi, Festus K.; Ajayi, Oluyede C.; Place, Frank	Meta-analysis of maize yield response to woody and herbaceous legumes in sub-Saharan Africa	{2008}	{JUN}	{PLANT AND SOIL}	{307}	{1-2}	{1-19}	{A number of studies have tested the effect of woody and herbaceous legumes on soil fertility and maize yields in sub-Saharan Africa. However, their effects on maize productivity are much debated because results have been variable. A meta-analysis was conducted with the aim of evaluating the evidence in support of yield benefits from woody and herbaceous green manure legumes. A total of 94 peer-r…
	ex			ex	Mayer, Paul M.; Reynolds, Jr., Steven K.; McCutchen, Marshall D.; Canfield, Timothy J.	Meta-analysis of nitrogen removal in riparian buffers	{2007}	{JUL-AUG}	{JOURNAL OF ENVIRONMENTAL QUALITY}	{36}	{4}	{1172-1180}	{Riparian buffers, the vegetated region adjacent to streams and wetlands, are thought to be effective at intercepting and reducing nitrogen loads entering water bodies. Riparian buffer width is thought to be positively related to nitrogen removal effectiveness by influencing nitrogen retention or removal. We surveyed the scientific literature containing data on riparian buffers and nitrogen conce…
	ex			ex	XiangDong, Lei; ChangHui, Peng; DaLun, Tian; JianFeng, Sun	Meta-analysis and its application in global change research	{2007}	{FEB}	{CHINESE SCIENCE BULLETIN}	{52}	{3}	{289-302}	{Meta-analysis is a quantitative synthetic research method that statistically integrates results from individual studies to find common trends and differences. With increasing concern over global change, meta-analysis has been rapidly adopted in global change research. Here, we introduce the methodologies, advantages and disadvantages of meta-analysis, and review its application in global climate…
	ex			ex	Epron, Daniel; Nouvellon, Yann; Deleporte, Philippe; Ifo, Suspens; Kazotti, Guy; M'Bou, Armel Thongo; Mouvondy, Welcome; Saint Andre, Laurent; Roupsard, Olivier; Jourdan, Christophe; Hamel, Olivier	Soil carbon balance in a clonal Eucalyptus plantation in Congo: effects of logging on carbon inputs and soil CO2 efflux	{2006}	{JUN}	{GLOBAL CHANGE BIOLOGY}	{12}	{6}	{1021-1031}	{Soil CO2 efflux was measured in clear-cut and intact plots in order to quantify the impact of harvest on soil respiration in an intensively managed Eucalyptus plantation, and to evaluate the increase in heterotrophic component of soil respiration because of the decomposition of harvest residues. Soil CO2 effluxes showed a pronounced seasonal trend, which was well related to the pattern of precip…
	ex			ex	Forrester, David I.; Bauhus, Juergen; Cowie, Annette L.; Vanclay, Jerome K.	Mixed-species plantations of Eucalyptus with nitrogen-fixing trees: A review	{2006}	{SEP 15}	{FOREST ECOLOGY AND MANAGEMENT}	{233}	{2-3}	{211-230}	{Mixed-species plantations of Eucalyptus with a nitrogen (N-2) fixing species have the potential to increase productivity while maintaining soil fertility, compared to Eucalyptus monocultures. However, it is difficult to predict combinations of species and sites that will lead to these benefits. We review the processes and interactions occurring in mixed plantations, and the influence of species …
	ex			ex	Raich, J. W.; Russell, A. E.; Kitayama, K.; Parton, W. J.; Vitousek, P. M.	Temperature influences carbon accumulation in moist tropical forests	{2006}	{JAN}	{ECOLOGY}	{87}	{1}	{76-87}	{Evergreen broad-leaved tropical forests can have high rates of productivity and large accumulations of carbon in plant biomass and soils. They can therefore play an important role in the global carbon cycle, influencing atmospheric CO2 concentrations if climate warms. We applied meta-analyses to published data to evaluate the apparent effects of temperature on carbon fluxes and storages in matur…
	ex			ex	Jastrow, J. D.; Miller, R. M.; Matamala, R.; Norby, R. J.; Boutton, T. W.; Rice, C. W.; Owensby, C. E.	Elevated atmospheric carbon dioxide increases soil carbon	{2005}	{DEC}	{GLOBAL CHANGE BIOLOGY}	{11}	{12}	{2057-2064}	{The general lack of significant changes in mineral soil C stocks during CO2-enrichment experiments has cast doubt on predictions that increased soil C can partially offset rising atmospheric CO2 concentrations. Here, we show, through meta-analysis techniques, that these experiments collectively exhibited a 5.6\% increase in soil C over 2-9 years, at a median rate of 19 g C m(-2) yr(-1). We also …
	ex			ex	Lettens, S.; van Orshoven, J.; van Wesemael, B.; Muys, B.; Perrin, D.	Soil organic carbon changes in landscape units of Belgium between 1960 and 2000 with reference to 1990	{2005}	{DEC}	{GLOBAL CHANGE BIOLOGY}	{11}	{12}	{2128-2140}	{The present study quantifies changes in soil organic carbon (SOC) stocks in Belgium between 1960, 1990 and 2000 for 289 spatially explicit land units with unique soil association and land-use type, termed landscape units (LSU). The SOC stocks are derived from multiple nonstandardized sets of field measurements up to a depth of 30 cm. Approximately half of the LSU show an increase in SOC between …
	ex			ex	Puget, P.; Lal, R.	Soil organic carbon and nitrogen in a Mollisol in central Ohio as affected by tillage and land use	{2005}	{JAN}	{SOIL \& TILLAGE RESEARCH}	{80}	{1-2}	{201-213}	{Minimum tillage practices are known for increasing soil organic carbon (SOC). However, not all environmental situations may manifest this potential change. The SOC and N stocks were assessed on a Mollisol in central Ohio in an 8-year-old tillage experiment as well as under two relatively undisturbed land uses; a secondary forest and a pasture, on the same soil type. Cropped systems had 51 +/- 4 …
	ex			ex	Zinn, Y. L.; Lal, R.; Resck, D. V. S.	Changes in soil organic carbon stocks under agriculture in Brazil	{2005}	{NOV}	{SOIL \& TILLAGE RESEARCH}	{84}	{1}	{28-40}	{Land use conversion from natural to agricultural ecosystems affects concentration and storage of soil organic carbon (SOC) depending on tillage frequency and depth, soil type, climate and other factors. Despite its importance, little is known about the magnitude and consistency of changes in SOC stocks (Mg ha(-1))due to management of highly weathered soils in Brazil. Prom 37 uncultivated/cultiva…
	in				Chen, Yongshan; Camps-Arbestain, Marta; Shen, Qinhua; Singh, Balwant; Cayuela, Maria Luz	The long-term role of organic amendments in building soil nutrient fertility: a meta-analysis and review	2018	SI}	{NUTRIENT CYCLING IN AGROECOSYSTEMS}	{111}	{2-3	{JUL}
	ex			ex	Abdalla, K.; Mutema, M.; Hill, T.	Soil and organic carbon losses from varying land uses: a global meta-analysis	2020	MAY	Geographical Research	58	2	167-185
	ex			ex	Abera, W.; Tamene, L.; Tibebe, D.; Adimassu, Z.; Kassa, H.; Hailu, H.; Mekonnen, K.; Desta, G.; Sommer, R.; Verchot, L.	Characterizing and evaluating the impacts of national land restoration initiatives on ecosystem services in Ethiopia	2020	JAN	Land Degradation and Development	31	1	37-52
	ex			ex	Berhane, M.; Xu, M.; Liang, Z.; Shi, J.; Wei, G.; Tian, X.	Effects of long-term straw return on soil organic carbon storage and sequestration rate in North China upland crops: A meta-analysis	2020	APR	Global Change Biology	26	4	2686-2701
	ex			ex	Bolinder, M. A.; Crotty, F.; Elsen, A.; Frac, M.; Kismányoky, T.; Lipiec, J.; Tits, M.; Tóth, Z.; Kätterer, T.	The effect of crop residues, cover crops, manures and nitrogen fertilization on soil organic carbon changes in agroecosystems: a synthesis of reviews	2020	AUG	Mitigation and Adaptation Strategies for Global Change	25	6	929-952
	ex			ex	Chen, D.; Wei, W.; Daryanto, S.; Tarolli, P.	Does terracing enhance soil organic carbon sequestration? A national-scale data analysis in China	2020	JUNE	Science of the Total Environment	721
	ex			ex	Huang, W.; González, G.; Zou, X.	Earthworm abundance and functional group diversity regulate plant litter decay and soil organic carbon level: A global meta-analysis	2020	JUNE	Applied Soil Ecology	150
	in				Jian, J.; Du, X.; Reiter, M. S.; Stewart, R. D.	A meta-analysis of global cropland soil carbon changes due to cover cropping	2020	APR	Soil Biology and Biochemistry	143
SOC not the main topic of study	ex	ex			Jian, J.; Lester, B. J.; Du, X.; Reiter, M. S.; Stewart, R. D.	A calculator to quantify cover crop effects on soil health and productivity	2020	MAY	Soil and Tillage Research	199
grassland/forest studied; not cropland	ex	ex			Ledo, A.; Smith, P.; Zerihun, A.; Whitaker, J.; Vicente-Vicente, J. L.; Qin, Z.; McNamara, N. P.; Zinn, Y. L.; Llorente, M.; Liebig, M.; Kuhnert, M.; Dondini, M.; Don, A.; Diaz-Pines, E.; Datta, A.; Bakka, H.; Aguilera, E.; Hillier, J.	Changes in soil organic carbon under perennial crops	2020	JULY	Global Change Biology	26	7	4158-4168
	ex			ex	Lei, S.; Ran, Z.; Long, M.; Kai, W.; Shu-Ting, W.; Tao-Tao, W.; Zhao-Hui, W.; Zi-Yan; Bing-Nian, Z.	Quantitative response of wheat yield and soil properties to biochar amendment in China	2020	?	Journal of Plant Nutrition and Fertilizers	26	7	1273-1283
	ex			ex	Li, Y.; Song, D.; Liang, S.; Dang, P.; Qin, X.; Liao, Y.; Siddique, K. H. M.	Effect of no-tillage on soil bacterial and fungal community diversity: A meta-analysis	2020	OCT	Soil and Tillage Research	204
	in				Li, Y.; Li, Z.; Chang, S. X.; Cui, S.; Jagadamma, S.; Zhang, Q.; Cai, Y.	Residue retention promotes soil carbon accumulation in minimum tillage systems: Implications for conservation agriculture	2020	OCT	Science of the Total Environment	740
	ex			ex	Li, Y.; Zhang, X.; Ren, F.; Sun, N.; Xu, M.; Xu, M.	A meta-analysis of long-term fertilization impact on soil dissolved organic carbon and nitrogen across Chinese cropland	2020	MARCH	Scientia Agricultura Sinica	53	6	1224-1233
	ex			ex	Liu, X.; Sheng, H.; Wang, Z.; Ma, Z.; Huang, X.; Li, L.	Does grazing exclusion improve soil carbon and nitrogen stocks in alpine grasslands on the Qinghai-Tibetan plateau? A meta-analysis	2020	FEB	Sustainability (Switzerland)	12	3
	ex			ex	Liu, S.; Wang, J.; Pu, S.; Blagodatskaya, E.; Kuzyakov, Y.; Razavi, B. S.	Impact of manure on soil biochemical properties: A global synthesis	2020	NOV	Science of the Total Environment	745
	ex		ex		Lu, X.	Fertilizer Types Affect Soil Organic Carbon Content and Crop Production: A Meta-analysis	2020	MARCH	Agricultural Research	9	1	94-101
	ex			ex	Du, Y.; Cui, B.; zhang, Q.; Wang, Z.; Sun, J.; Niu, W.	Effects of manure fertilizer on crop yield and soil properties in China: A meta-analysis	2020	OCT	Catena	193
	ex			ex	Gram, G.; Roobroeck, D.; Pypers, P.; Six, J.; Merckx, R.; Vanlauwe, B.	Combining organic and mineral fertilizers as a climate-smart integrated soil fertility management practice in sub-Saharan Africa: A meta-analysis	2020	SEP (9th)	PLoS ONE	15	2020-09-09
	ex			ex	Hassan, M.; Liu, Y.; Naidu, R.; Parikh, S. J.; Du, J.; Qi, F.; Willett, I. R.	Influences of feedstock sources and pyrolysis temperature on the properties of biochar and functionality as adsorbents: A meta-analysis	2020	NOV	Science of the Total Environment	744
	ex			ex	Jia, L.; Zhao, W.; Zhai, R.; An, Y.; Pereira, P.	Quantifying the effects of contour tillage in controlling water erosion in China: A meta-analysis	2020	DEC	Catena	195
	ex			ex	Mbava, N.; Mutema, M.; Zengeni, R.; Shimelis, H.; Chaplot, V.	Factors affecting crop water use efficiency: A worldwide meta-analysis	2020	FEB	Agricultural Water Management	228
	ex			ex	Mo, F.; Yu, K.-L.; Crowther, T. W.; Wang, J.-Y.; Zhao, H.; Xiong, Y.-C.; Liao, Y.-C.	How plastic mulching affects net primary productivity, soil C fluxes and organic carbon balance in dry agroecosystems in China	2020	AUG	Journal of Cleaner Production	263
	in				Mondal, S.; Chakraborty, D.; Bandyopadhyay, K.; Aggarwal, P.; Rana, D. S.	A global analysis of the impact of zero-tillage on soil physical condition, organic carbon content, and plant root response	2020	MARCH	Land Degradation and Development	31	5	557-567
	ex		ex		Muchane, M. N.; Sileshi, G. W.; Gripenberg, S.; Jonsson, M.; Pumariño, L.; Barrios, E.	Agroforestry boosts soil health in the humid and sub-humid tropics: A meta-analysis	2020	JUNE	Agriculture, Ecosystems and Environment	295
	ex			ex	Nunes, M. R.; Karlen, D. L.; Veum, K. S.; Moorman, T. B.; Cambardella, C. A.	Biological soil health indicators respond to tillage intensity: A US meta-analysis	2020	JUNE	Geoderma	369
	ex			ex	Paul, B. K.; Koge, J.; Maass, B. L.; Notenbaert, A.; Peters, M.; Groot, J. C. J.; Tittonell, P.	Tropical forage technologies can deliver multiple benefits in Sub-Saharan Africa. A meta-analysis	2020	AUG	Agronomy for Sustainable Development	40	4
SOC not main topic	ex		ex		Peixoto, D. S.; Silva, L. D. C. M. D.; Melo, L. B. B. D.; Azevedo, R. P.; Araújo, B. C. L.; Carvalho, T. S. D.; Moreira, S. G.; Curi, N.; Silva, B. M.	Occasional tillage in no-tillage systems: A global meta-analysis	2020	NOV	Science of the Total Environment	745
	ex			ex	Shang, Z.; Abdalla, M.; Kuhnert, M.; Albanito, F.; Zhou, F.; Xia, L.; Smith, P.	Measurement of N2O emissions over the whole year is necessary for estimating reliable emission factors	2020	APR	Environmental Pollution	259
	in				Sun, W.; Canadell, J. G.; Yu, L.; Yu, L.; Zhang, W.; Smith, P.; Fischer, T.; Huang, Y.	Climate drives global soil carbon sequestration and crop yield changes under conservation agriculture	2020	JUNE	Global Change Biology	26	6	3325-3335
SOC not main topic	ex	ex			Tenic, E.; Ghogare, R.; Dhingra, A.	Biochar—a panacea for agriculture or just carbon?	2020	SEP	Horticulturae	6	3	1940-01-01
	ex			ex	Villarino, S. H.; Pinto, P.; Della Chiesa, T.; Jobbágy, E. G.; Studdert, G. A.; Bazzoni, B.; Conti, G.; Rufino, M.; Álvarez, R.; Boddey, R.; Bayer, C.; de F. Carvalho, P. C.; Fernández, R. J.; Lattanzi, F. A.; Oesterheld, M.; Oyhantçabal, W.; Paruelo, J. M.; Pravia, V.; Piñeiro, G.	The role of South American grazing lands in mitigating greenhouse gas emissions. A reply to: “Reassessing the role of grazing lands in carbon-balance estimations: Meta-analysis and review”, by Viglizzo et al., (2019)	2020	OCT	Science of the Total Environment	740
	ex		ex		Waqas, M. A.; Li, Y.; Smith, P.; Wang, X.; Ashraf, M. N.; Noor, M. A.; Amou, M.; Shi, S.; Zhu, Y.; Li, J.; Wan, Y.; Qin, X.; Gao, Q.; Liu, S.	The influence of nutrient management on soil organic carbon storage, crop production, and yield stability varies under different climates	2020	SEP	Journal of Cleaner Production	268
	ex			ex	Waqas, M. A.; Li, Y.; Lal, R.; Wang, X.; Shi, S.; Zhu, Y.; Li, J.; Xu, M.; Wan, Y.; Qin, X.; Gao, Q.; Liu, S.	When does nutrient management sequester more carbon in soils and produce high and stable grain yields in China?	2020	SEP	Land Degradation and Development	31	15	1926-1941
	ex			ex	Xia, F.; Mei, K.; Xu, Y.; Zhang, C.; Dahlgren, R. A.; Zhang, M.	Response of N2O emission to manure application in field trials of agricultural soils across the globe	2020	SEP	Science of the Total Environment	733
	ex			ex	Xu, G.; Long, Z.; Ren, P.; Ren, C.; Cao, Y.; Huang, Y.; Hu, S.	Differential responses of soil hydrolytic and oxidative enzyme activities to the natural forest conversion	2020	MAY	Science of the Total Environment	716
	ex		ex		Young, M. D.; Ros, G. H.; de Vries, W.	A decision support framework assessing management impacts on crop yield, soil carbon changes and nitrogen losses to the environment	2020	JULY	European Journal of Soil Science
	ex			ex	Zhan, T.; Zhang, Z.; Sun, J.; Liu, M.; Zhang, X.; Peng, F.; Tsunekawa, A.; Zhou, H.; Gou, X.; Fu, S.	Meta-analysis demonstrating that moderate grazing can improve the soil quality across China's grassland ecosystems	2020	MARCH	Applied Soil Ecology	147
	ex			ex	Zhan, T.; Sun, J.; Zhang, Z.; Liu, M.	Effects of grazing on temperate grassland ecosystem based on a meta-analysis [基于meta分析的放牧压力对内蒙古高原草地 生态系统的影响]	2020	DEC	Chinese Journal of Eco-Agriculture	28	12	1847-1858
	ex			ex	Zhao, J.; Yang, Y.; Zhang, K.; Jeong, J.; Zeng, Z.; Zang, H.	Does crop rotation yield more in China? A meta-analysis	2020	JAN	Field Crops Research	245
	ex			ex	Zhao, X.; Liu, B.-Y.; Liu, S.-L.; Qi, J.-Y.; Wang, X.; Pu, C.; Li, S.-S.; Zhang, X.-Z.; Yang, X.-G.; Lal, R.; Chen, F.; Zhang, H.-L.	Sustaining crop production in China's cropland by crop residue retention: A meta-analysis	2020	APR	Land Degradation and Development	31	6	694-709
	ex		ex		Beillouin, D.; Ben-Ari, T.; Makowski, D.	Evidence map of crop diversification strategies at the global scale	2019		Environmental Research Letters	14	12
	ex			ex	Gao, S.; DeLuca, T. H.; Cleveland, C. C.	Biochar additions alter phosphorus and nitrogen availability in agricultural ecosystems: A meta-analysis	2019		Science of the Total Environment	654		463-472
	ex		ex		Gravuer, K.; Gennet, S.; Throop, H. L.	Organic amendment additions to rangelands: A meta-analysis of multiple ecosystem outcomes	2019		Global Change Biology	25	3	1152-1170
	ex			ex	Griffiths, N. A.; Rau, B. M.; Vaché, K. B.; Starr, G.; Bitew, M. M.; Aubrey, D. P.; Martin, J. A.; Benton, E.; Jackson, C. R.	Environmental effects of short-rotation woody crops for bioenergy: What is and isn't known	2019		GCB Bioenergy	11	4	554-572
	ex			ex	King, A. E.; Congreves, K. A.; Deen, B.; Dunfield, K. E.; Voroney, R. P.; Wagner-Riddle, C.	Quantifying the relationships between soil fraction mass, fraction carbon, and total soil carbon to assess mechanisms of physical protection	2019		Soil Biology and Biochemistry	135		95-107
	ex			ex	Kuyah, S.; Whitney, C. W.; Jonsson, M.; Sileshi, G. W.; Öborn, I.; Muthuri, C. W.; Luedeling, E.	Agroforestry delivers a win-win solution for ecosystem services in sub-Saharan Africa. A meta-analysis	2019		Agronomy for Sustainable Development	39	5
	ex			ex	Lutz, F.; Herzfeld, T.; Heinke, J.; Rolinski, S.; Schaphoff, S.; Von Bloh, W.; Stoorvogel, J. J.; Müller, C.	Simulating the effect of tillage practices with the global ecosystem model LPJmL (version 5.0-tillage)	2019		Geoscientific Model Development	12	6	2419-2440
	in				Majumder, S.; Neogi, S.; Dutta, T.; Powel, M. A.; Banik, P.	The impact of biochar on soil carbon sequestration: Meta-analytical approach to evaluating environmental and economic advantages	2019		Journal of Environmental Management	250
	ex		ex		Mandal, D.	Soil management for regulating C pools: Perspective in tropical and subtropical soils	2019		Carbon Management in Tropical and Sub-Tropical Terrestrial Systems			57-70
	ex			ex	Miao, F.; Li, Y.; Cui, S.; Jagadamma, S.; Yang, G.; Zhang, Q.	Soil extracellular enzyme activities under long-term fertilization management in the croplands of China: a meta-analysis	2019		Nutrient Cycling in Agroecosystems	114	2	125-138
	ex			ex	Muhammad, I.; Sainju, U. M.; Zhao, F.; Khan, A.; Ghimire, R.; Fu, X.; Wang, J.	Regulation of soil CO2 and N2O emissions by cover crops: A meta-analysis	2019		Soil and Tillage Research	192		103-112
	ex			ex	Nave, L. E.; DeLyser, K.; Butler-Leopold, P. R.; Sprague, E.; Daly, J.; Swanston, C. W.	Effects of land use and forest management on soil carbon in the ecoregions of Maryland and adjacent eastern United States	2019		Forest Ecology and Management	448		34-47
	ex		ex		Oldfield, E. E.; Bradford, M. A.; Wood, S. A.	Global meta-analysis of the relationship between soil organic matter and crop yields	2019		SOIL	5	1	15-32
	ex		ex		Shackelford, G. E.; Kelsey, R.; Dicks, L. V.	Effects of cover crops on multiple ecosystem services: Ten meta-analyses of data from arable farmland in California and the Mediterranean	2019		Land Use Policy	88
	ex			ex	Smith, O. M.; Cohen, A. L.; Rieser, C. J.; Davis, A. G.; Taylor, J. M.; Adesanya, A. W.; Jones, M. S.; Meier, A. R.; Reganold, J. P.; Orpet, R. J.; Northfield, T. D.; Crowder, D. W.	Organic Farming Provides Reliable Environmental Benefits but Increases Variability in Crop Yields: A Global Meta-Analysis	2019		Frontiers in Sustainable Food Systems	3
	ex			ex	Tang, S.; Guo, J.; Li, S.; Li, J.; Xie, S.; Zhai, X.; Wang, C.; Zhang, Y.; Wang, K.	Synthesis of soil carbon losses in response to conversion of grassland to agriculture land	2019		Soil and Tillage Research	185		29-35
	ex			ex	Udawatta, R. P.; Rankoth, L. M.; Jose, S.	Agroforestry and biodiversity	2019		Sustainability (Switzerland)	11	10
	ex			ex	Viglizzo, E. F.; Ricard, M. F.; Taboada, M. A.; Vázquez-Amábile, G.	Reassessing the role of grazing lands in carbon-balance estimations: Meta-analysis and review	2019		Science of the Total Environment	661		531-542
	ex		ex		De Stefano, Andrea; Jacobson, Michael G.	Soil carbon sequestration in agroforestry systems: a meta-analysis	2018	{APR}	{AGROFORESTRY SYSTEMS}	{92}	{2
	ex			ex	Zhang, Hai-Yang; Lu, Xiao-Tao; Knapp, Alan K.; Hartmann, Henrik; Bai, Edith; Wang, Xiao-Bo; Wang, Zheng-Wen; Wang, Xiao-Guang; Yu, Qiang; Han, Xing-Guo	Facilitation by leguminous shrubs increases along a precipitation gradient	2018	{JAN}	{FUNCTIONAL ECOLOGY}	{32}	{1
	ex			ex	Abdalla, M.; Hastings, A.; Chadwick, D. R.; Jones, D. L.; Evans, C. D.; Jones, M. B.; Rees, R. M.; Smith, P.	Critical review of the impacts of grazing intensity on soil organic carbon storage and other soil quality indicators in extensively managed grasslands	2018		Agriculture, Ecosystems and Environment	253		62-81
	ex			ex	Bayala, J.; Kalinganire, A.; Sileshi, G. W.; Tondoh, J. E.	Soil organic carbon and nitrogen in agroforestry systems in sub-Saharan Africa: A review	2018		Improving the Profitability, Sustainability and Efficiency of Nutrients Through Site Specific Fertilizer Recommendations in West Africa Agro-Ecosystems	1		51-61
	ex			ex	Byrnes, R. C.; Eastburn, D. J.; Tate, K. W.; Roche, L. M.	A global meta-analysis of grazing impacts on soil health indicators	2018		Journal of Environmental Quality	47	4	758-765
	ex			ex	Delonge, M.; Basche, A.	Managing grazing lands to improve soils and promote climate change adaptation and mitigation: A global synthesis	2018		Renewable Agriculture and Food Systems	33	3	267-278
	in				García-Palacios, P.; Gattinger, A.; Bracht-Jørgensen, H.; Brussaard, L.; Carvalho, F.; Castro, H.; Clément, J.-C.; De Deyn, G.; D'Hertefeldt, T.; Foulquier, A.; Hedlund, K.; Lavorel, S.; Legay, N.; Lori, M.; Mäder, P.; Martínez-García, L. B.; Martins da Silva, P.; Muller, A.; Nascimento, E.; Reis, F.; Symanczik, S.; Paulo Sousa, J.; Milla, R.	Crop traits drive soil carbon sequestration under organic farming	2018		Journal of Applied Ecology	55	5	2496-2505
	ex		ex		Gollany, H. T.; Venterea, R. T.	Measurements and models to identify agroecosystem practices that Enhance soil organic carbon under changing climate	2018		Journal of Environmental Quality	47	4	579-587
	ex			ex	Han, X.; Xu, C.; Dungait, J. A. J.; Bol, R.; Wang, X.; Wu, W.; Meng, F.	Straw incorporation increases crop yield and soil organic carbon sequestration but varies under different natural conditions and farming practices in China: A system analysis	2018		Biogeosciences	15	7	1933-1946
	in				King, A. E.; Blesh, J.	Crop rotations for increased soil carbon: Perenniality as a guiding principle: Perenniality	2018		Ecological Applications	28	1	249-261
	ex			ex	Linquist, B. A.; Marcos, M.; Arlene Adviento-Borbe, M.; Anders, M.; Harrell, D.; Linscombe, S.; Reba, M. L.; Runkle, B. R. K.; Tarpley, L.; Thomson, A.	Greenhouse gas emissions and management practices that affect emissions in US rice systems	2018		Journal of Environmental Quality	47	3	395-409
	in				Meurer, K. H. E.; Haddaway, N. R.; Bolinder, M. A.; Kätterer, T.	Tillage intensity affects total SOC stocks in boreo-temperate regions only in the topsoil—A systematic review using an ESM approach	2018		Earth-Science Reviews	177		613-622
	ex			ex	Sun, D.; Hale, L.; Kar, G.; Soolanayakanahally, R.; Adl, S.	Phosphorus recovery and reuse by pyrolysis: Applications for agriculture and environment	2018		Chemosphere	194		682-691
	ex		ex		Wan, X.; Xiao, L.; Vadeboncoeur, M. A.; Johnson, C. E.; Huang, Z.	Response of mineral soil carbon storage to harvest residue retention depends on soil texture: A meta-analysis	2018		Forest Ecology and Management	408		2015-09-01
	ex			ex	Winter, S.; Bauer, T.; Strauss, P.; Kratschmer, S.; Paredes, D.; Popescu, D.; Landa, B.; Guzmán, G.; Gómez, J. A.; Guernion, M.; Zaller, J. G.; Batáry, P.	Effects of vegetation management intensity on biodiversity and ecosystem services in vineyards: A meta-analysis	2018		Journal of Applied Ecology	55	5	2484-2495
	ex			ex	Čugunovs, M.; Tuittila, E.-S.; Mehtätalo, L.; Pekkola, L.; Sara-Aho, I.; Kouki, J.	Variability and patterns in forest soil and vegetation characteristics after prescribed burning in clear-cuts and restoration burnings	2017		Silva Fennica	51	1
review (qualitative) on this topic	ex	ex			Dignac, M.-F.; Derrien, D.; Barré, P.; Barot, S.; Cécillon, L.; Chenu, C.; Chevallier, T.; Freschet, G. T.; Garnier, P.; Guenet, B.; Hedde, M.; Klumpp, K.; Lashermes, G.; Maron, P.-A.; Nunan, N.; Roumet, C.; Basile-Doelsch, I.	Increasing soil carbon storage: mechanisms, effects of agricultural practices and proxies. A review	2017		Agronomy for Sustainable Development	37	2
	ex			ex	Geisseler, D.; Linquist, B. A.; Lazicki, P. A.	Effect of fertilization on soil microorganisms in paddy rice systems – A meta-analysis	2017		Soil Biology and Biochemistry	115		452-460
	in				Haddaway, N. R.; Hedlund, K.; Jackson, L. E.; Kätterer, T.; Lugato, E.; Thomsen, I. K.; Jørgensen, H. B.; Isberg, P.-E.	How does tillage intensity affect soil organic carbon? A systematic review	2017		Environmental Evidence	6	1
	ex			ex	He, Y.; Zhou, X.; Jiang, L.; Li, M.; Du, Z.; Zhou, G.; Shao, J.; Wang, X.; Xu, Z.; Hosseini Bai, S.; Wallace, H.; Xu, C.	Effects of biochar application on soil greenhouse gas fluxes: a meta-analysis	2017		GCB Bioenergy	9	4	743-755
	ex			ex	Jiang, Y.; van Groenigen, K. J.; Huang, S.; Hungate, B. A.; van Kessel, C.; Hu, S.; Zhang, J.; Wu, L.; Yan, X.; Wang, L.; Chen, J.; Hang, X.; Zhang, Y.; Horwath, W. R.; Ye, R.; Linquist, B. A.; Song, Z.; Zheng, C.; Deng, A.; Zhang, W.	Higher yields and lower methane emissions with new rice cultivars	2017		Global Change Biology	23	11	4728-4738
	in				Kopittke, P. M.; Dalal, R. C.; Finn, D.; Menzies, N. W.	Global changes in soil stocks of carbon, nitrogen, phosphorus, and sulphur as influenced by long-term agricultural production	2017		Global Change Biology	23	6	2509-2519
	ex			ex	Land, M.; Haddaway, N. R.; Hedlund, K.; Jørgensen, H. B.; Kätterer, T.; Isberg, P.-E.	How do selected crop rotations affect soil organic carbon in boreo-temperate systems? A systematic review protocol	2017		Environmental Evidence	6	1
	ex			ex	Lori, M.; Symnaczik, S.; Mäder, P.; De Deyn, G.; Gattinger, A.	Organic farming enhances soil microbial abundance and activity—A meta-analysis and meta-Regression	2017		PLoS ONE	12	7
	ex			ex	Mehmood, K.; Chávez Garcia, E.; Schirrmann, M.; Ladd, B.; Kammann, C.; Wrage-Mönnig, N.; Siebe, C.; Estavillo, J. M.; Fuertes-Mendizabal, T.; Cayuela, M.; Sigua, G.; Spokas, K.; Cowie, A. L.; Novak, J.; Ippolito, J. A.; Borchard, N.	Biochar research activities and their relation to development and environmental quality. A meta-analysis	2017		Agronomy for Sustainable Development	37	3
SOC is not main topic	ex		ex		Ranaivoson, L.; Naudin, K.; Ripoche, A.; Affholder, F.; Rabeharisoa, L.; Corbeels, M.	Agro-ecological functions of crop residues under conservation agriculture. A review	2017		Agronomy for Sustainable Development	37	4
	ex			ex	You, C.; Wu, F.; Yang, W.; Tan, B.; Yue, K.; Ni, X.	The National Key Forestry Ecology Project has changed the zonal pattern of forest litter production in China	2017		Forest Ecology and Management	399		37-46
	ex			ex	Zhang, Q.; Miao, F.; Wang, Z.; Shen, Y.; Wang, G.	Effects of long-term fertilization management practices on soil microbial biomass in China’s cropland: A meta-analysis	2017		Agronomy Journal	109	4	1183-1195
	ex			ex	Zhou, M.; Zhu, B.; Wang, S.; Zhu, X.; Vereecken, H.; Brüggemann, N.	Stimulation of N2O emission by manure application to agricultural soils may largely offset carbon benefits: a global meta-analysis	2017		Global Change Biology	23	10	4068-4083
	ex			ex	Abdalla, K.; Chivenge, P.; Ciais, P.; Chaplot, V.	No-tillage lessens soil CO2 emissions the most under arid and sandy soil conditions: Results from a meta-analysis	2016		Biogeosciences	13	12	3619-3633
	ex			ex	Alvarez, C. R.; Alvarez, R.	Are active organic matter fractions suitable indices of management effects on soil carbon? A meta-analysis of data from the Pampas	2016		Archives of Agronomy and Soil Science	62	11	1592-1601
	in				Cooper, J.; Baranski, M.; Stewart, G.; Nobel-de Lange, M.; Bàrberi, P.; Fließbach, A.; Peigné, J.; Berner, A.; Brock, C.; Casagrande, M.; Crowley, O.; David, C.; De Vliegher, A.; Döring, T. F.; Dupont, A.; Entz, M.; Grosse, M.; Haase, T.; Halde, C.; Hammerl, V.; Huiting, H.; Leithold, G.; Messmer, M.; Schloter, M.; Sukkel, W.; van der Heijden, M. G. A.; Willekens, K.; Wittwer, R.; Mäder, P.	Shallow non-inversion tillage in organic farming maintains crop yields and increases soil C stocks: a meta-analysis	2016		Agronomy for Sustainable Development	36	1
	ex			ex	Delgado-Baquerizo, M.; Maestre, F. T.; Reich, P. B.; Trivedi, P.; Osanai, Y.; Liu, Y.-R.; Hamonts, K.; Jeffries, T. C.; Singh, B. K.	Carbon content and climate variability drive global soil bacterial diversity patterns	2016		Ecological Monographs	86	3	373-380
	ex			ex	Geisseler, D.; Lazicki, P. A.; Scow, K. M.	Mineral nitrogen input decreases microbial biomass in soils under grasslands but not annual crops	2016		Applied Soil Ecology	106		2021-10-01
systematic review	ex		ex		Haddaway, N. R.; Hedlund, K.; Jackson, L. E.; Kätterer, T.; Lugato, E.; Thomsen, I. K.; Jørgensen, H. B.; Isberg, P.-E.	Which agricultural management interventions are most influential on soil organic carbon (using time series data)?	2016		Environmental Evidence	5	1
	in				Han, P.; Zhang, W.; Wang, G.; Sun, W.; Huang, Y.	Changes in soil organic carbon in croplands subjected to fertilizer management: A global meta-analysis	2016		Scientific Reports	6
data from 1 LTE field	ex	ex			Jokubauskaite, I.; Karčauskienė, D.; Slepetiene, A.; Repsiene, R.; Amaleviciute, K.	Effect of different fertilization modes on soil organic carbon sequestration in acid soils	2016		Acta Agriculturae Scandinavica Section B: Soil and Plant Science	66	8	647-652
	ex			ex	Nguyen, D. B.; Rose, M. T.; Rose, T. J.; Morris, S. G.; van Zwieten, L.	Impact of glyphosate on soil microbial biomass and respiration: A meta-analysis	2016		Soil Biology and Biochemistry	92		50-57
	ex			ex	Omondi, M. O.; Xia, X.; Nahayo, A.; Liu, X.; Korai, P. K.; Pan, G.	Quantification of biochar effects on soil hydrological properties using meta-analysis of literature data	2016		Geoderma	274		28-34
	ex		ex		Pecio, A.; Jarosz, Z.	Long-term effects of soil management practices on selected indicators of chemical soil quality [Wpływ wieloletniego stosowania zabiegów agrotechnicznych na wybrane właściwości chemiczne gleb]	2016		Acta Agrobotanica	69	2
	ex		ex		Powlson, D. S.; Stirling, C. M.; Thierfelder, C.; White, R. P.; Jat, M. L.	Does conservation agriculture deliver climate change mitigation through soil carbon sequestration in tropical agro-ecosystems?	2016		Agriculture, Ecosystems and Environment	220		164-174
	ex			ex	Swanepoel, C. M.; van der Laan, M.; Weepener, H. L.; du Preez, C. C.; Annandale, J. G.	Review and meta-analysis of organic matter in cultivated soils in southern Africa	2016		Nutrient Cycling in Agroecosystems	104	2	107-123
woody crops only (orchard, olive)	ex			ex	Vicente-Vicente, J. L.; García-Ruiz, R.; Francaviglia, R.; Aguilera, E.; Smith, P.	Soil carbon sequestration rates under Mediterranean woody crops using recommended management practices: A meta-analysis	2016		Agriculture, Ecosystems and Environment	235		204-214
	ex			ex	Zuber, S. M.; Villamil, M. B.	Meta-analysis approach to assess effect of tillage on microbial biomass and enzyme activities	2016		Soil Biology and Biochemistry	97		176-187
	ex			ex	Fujisaki, K.; Perrin, A..-S.; Desjardins, T.; Bernoux, M.; Balbino, L. C.; Brossard, M.	From forest to cropland and pasture systems: A critical review of soil organic carbon stocks changes in Amazonia	2015		Global Change Biology	21	7	2773-2786
	ex		ex		Haddaway, N. R.; Hedlund, K.; Jackson, L. E.; Kätterer, T.; Lugato, E.; Thomsen, I. K.; Jørgensen, H. B.; Söderström, B.	What are the effects of agricultural management on soil organic carbon in boreo-temperate systems?	2015		Environmental Evidence	4	1
	ex			ex	Harris, Z. M.; Spake, R.; Taylor, G.	Land use change to bioenergy: A meta-analysis of soil carbon and GHG emissions	2015		Biomass and Bioenergy	82		27-39
	ex		ex		Lee, K. S.; Choe, Y. C.; Park, S. H.	Measuring the environmental effects of organic farming: A meta-analysis of structural variables in empirical research	2015		Journal of Environmental Management	162		263-274
	ex			ex	Miranda, N. D.; Tuomisto, H. L.; McCulloch, M. D.	Meta-analysis of greenhouse gas emissions from anaerobic digestion processes in dairy farms	2015		Environmental Science and Technology	49	8	5211-5219
	ex			ex	Mutema, M.; Chaplot, V.; Jewitt, G.; Chivenge, P.; Blöschl, G.	Annual water, sediment, nutrient, and organic carbon fluxes in river basins: A global meta-analysis as a function of scale	2015		Water Resources Research	51	11	8949-8972
	in				Poeplau, C.; Don, A.	Carbon sequestration in agricultural soils via cultivation of cover crops - A meta-analysis	2015		Agriculture, Ecosystems and Environment	200		33-41
	ex			ex	Shiferaw, A.; Hergarten, C.; Kassawmar, T.; Zeleke, G.	Meta-analysis of long-term land management effect on soil organic carbon (SOC) in Ethiopia	2015		International Journal of Agricultural Research	10	1	2013-01-01
	ex			ex	Tian, K.; Zhao, Y.; Xu, X.; Hai, N.; Huang, B.; Deng, W.	Effects of long-term fertilization and residue management on soil organic carbon changes in paddy soils of China: A meta-analysis	2015		Agriculture, Ecosystems and Environment	204		40-50
	ex			ex	De Paul Obade, V.; Lal, R.	Using meta-analyses to assess pedo-variability under different land uses and soil management in central Ohio, USA	2014		Geoderma	232-234		56-68
	ex			ex	Haddaway, N. R.; Burden, A.; Evans, C. D.; Healey, J. R.; Jones, D. L.; Dalrymple, S. E.; Pullin, A. S.	Evaluating effects of land management on greenhouse gas fluxes and carbon balances in boreo-temperate lowland peatland systems	2014		Environmental Evidence	3	1
	ex			ex	Kurganova, I.; Lopes de Gerenyu, V.; Six, J.; Kuzyakov, Y.	Carbon cost of collective farming collapse in Russia	2014		Global Change Biology	20	3	938-947
	ex			ex	Lugato, E.; Bampa, F.; Panagos, P.; Montanarella, L.; Jones, A.	Potential carbon sequestration of European arable soils estimated by modelling a comprehensive set of management practices	2014		Global Change Biology	20	11	3557-3567
	ex			ex	Luo, Z.; Wang, E.; Baldock, J.; Xing, H.	Potential soil organic carbon stock and its uncertainty under various cropping systems in Australian cropland	2014		Soil Research	52	5	463-475
	in				McDaniel, M. D.; Tiemann, L. K.; Grandy, A. S.	Does agricultural crop diversity enhance soil microbial biomass and organic matter dynamics? A meta-analysis	2014		Ecological Applications	24	3	560-570
	ex			ex	Niggli, U.	Sustainability of organic food production: Challenges and innovations	2014		Proceedings of the Nutrition Society	760
	ex			ex	Rose, M. T.; Patti, A. F.; Little, K. R.; Brown, A. L.; Jackson, W. R.; Cavagnaro, T. R.	A meta-analysis and review of plant-growth response to humic substances: Practical implications for agriculture	2014		Advances in Agronomy	124		37-89
	ex			ex	Skinner, C.; Gattinger, A.; Muller, A.; Mäder, P.; Fliebach, A.; Stolze, M.; Ruser, R.; Niggli, U.	Greenhouse gas fluxes from agricultural soils under organic and non-organic management - A global meta-analysis	2014		Science of the Total Environment	468-469		553-563
	ex			ex	Song, X.; Peng, C.; Zhou, G.; Jiang, H.; Wang, W.	Chinese Grain for Green Program led to highly increased soil organic carbon levels: A meta-analysis	2014		Scientific Reports	4
	ex			ex	Tian, K.; Zhao, Y. C.; Xu, X. H.; Huang, B.; Sun, W. X.; Shi, X. Z.; Deng, W. J.	A meta-analysis of field experiment data for characterizing the topsoil organic carbon changes under different fertilization treatments in uplands of China	2014		Shengtai Xuebao/ Acta Ecologica Sinica	34	13	3735-3743
experimental sites only in USA	ex	ex			Ugarte, C. M.; Kwon, H.; Andrews, S. S.; Wander, M. M.	A meta-analysis of soil organic matter response to soil management practices: An approach to evaluate conservation indicators	2014		Journal of Soil and Water Conservation	69	5	422-430
	ex			ex	Crane-Droesch, A.; Abiven, S.; Jeffery, S.; Torn, M. S.	Heterogeneous global crop yield response to biochar: A meta-regression analysis	2013		Environmental Research Letters	8	4
	ex			ex	Luo, Z.; Wang, E.; Bryan, B. A.; King, D.; Zhao, G.; Pan, X.; Bende-Michl, U.	Meta-modeling soil organic carbon sequestration potential and its application at regional scale	2013		Ecological Applications	23	2	408-420
	ex			ex	Maia, S. M. F.; Carvalho, J. L. N.; Cerri, C. E. P.; Lal, R.; Bernoux, M.; Galdos, M. V.; Cerri, C. C.	Contrasting approaches for estimating soil carbon changes in Amazon and Cerrado biomes	2013		Soil and Tillage Research	133		75-84
	ex			ex	Nave, L. E.; Swanston, C. W.; Mishra, U.; Nadelhoffer, K. J.	Afforestation effects on soil carbon storage in the united states: A synthesis	2013		Soil Science Society of America Journal	77	3	1035-1047
	ex			ex	Uphoff, N.; Kassam, A.; Thakur, A.	Challenges of increasing water saving and water productivity in the rice sector: Introduction to the system of rice intensification (SRI) and this issue	2013		Taiwan Water Conservancy	61	4	2013-01-01
term meta-analysis not mentioned	ex	ex			Post, Wilfred M.; Izaurralde, R. Cesar; West, Tristram O.; Liebig, Mark A.; King, Anthony W.	Management opportunities for enhancing terrestrial carbon dioxide sinks	2012	{DEC}	{FRONTIERS IN ECOLOGY AND THE ENVIRONMENT}	{10}	{10
	ex			ex	Álvarez, R.	Agricultural management changes in pampean soils related to rotation and tillage: Impacts on soil organic reservoirs	2012		Soil Fertility: Characteristics, Processes and Management			29-54
	ex			ex	Huang, S.; Sun, Y.; Zhang, W.	Changes in soil organic carbon stocks as affected by cropping systems and cropping duration in China's paddy fields: A meta-analysis	2012		Climatic Change	112	2021-04-03	847-858
	ex			ex	Li, D.; Niu, S.; Luo, Y.	Global patterns of the dynamics of soil carbon and nitrogen stocks following afforestation: A meta-analysis	2012		New Phytologist	195	1	172-181
	ex			ex	Ma, S.; Li, Z.; Wang, B.; Liu, R.; Geri, L.; Wang, G.	Changes in soil active organic carbon under different management types of bamboo stands	2012		Shengtai Xuebao/ Acta Ecologica Sinica	32	8	2603-2611
experimental sites only in USA or Canada	ex	ex			Ogle, S. M.; Swan, A.; Paustian, K.	No-till management impacts on crop productivity, carbon input and soil carbon sequestration	2012		Agriculture, Ecosystems and Environment	149		37-49
	in				Tuomisto, H. L.; Hodge, I. D.; Riordan, P.; Macdonald, D. W.	Does organic farming reduce environmental impacts? - A meta-analysis of European research	2012		Journal of Environmental Management	112		309-320
	ex			ex	Kallenbach, C.; Grandy, A. S.	Controls over soil microbial biomass responses to carbon amendments in agricultural systems: A meta-analysis	2011		Agriculture, Ecosystems and Environment	144	1	241-252
	ex			ex	Kaschuk, G.; Alberton, O.; Hungria, M.	Quantifying effects of different agricultural land uses on soil microbial biomass and activity in Brazilian biomes: Inferences to improve soil quality	2011		Plant and Soil	338	1	467-481
	in				Ladha, J. K.; Reddy, C. K.; Padre, A. T.; van Kessel, C.	Role of nitrogen fertilization in sustaining organic matter in cultivated soils	2011		Journal of Environmental Quality	40	6	1756-1766
	ex			ex	Underwood, T.; McCullum-Gomez, C.; Harmon, A.; Roberts, S.	Organic Agriculture Supports Biodiversity and Sustainable Food Production	2011		Journal of Hunger and Environmental Nutrition	6	4	398-423
	ex			ex	Kaschuk, G.; Alberton, O.; Hungria, M.	Three decades of soil microbial biomass studies in Brazilian ecosystems: Lessons learned about soil quality and indications for improving sustainability	2010		Soil Biology and Biochemistry	42	1	2013-01-01
	ex			ex	Rischia, I.; di Leginio, M.; Fumanti, F.; Giandon, P.; Obber, S.; Vinci, I.	Environmental indicators for Italian soils (Sias project): Development of a new approach from regional to harmonised national data	2010		Italian Journal of Agronomy	5	SUPPL. 3	103-107
	ex			ex	Taylor, P. G.; Townsend, A. R.	Stoichiometric control of organic carbon-nitrate relationships from soils to the sea	2010		Nature	464	7292	1178-1181
	ex			ex	VandenBygaart, A. J.; Bremer, E.; McConkey, B. G.; Janzen, H. H.; Angers, D. A.; Carter, M. R.; Drury, C. F.; Lafond, G. P.; McKenzie, R. H.	Soil organic carbon stocks on long-term agroecosystem experiments in Canada	2010		Canadian Journal of Soil Science	90	4	543-550
	ex			ex	Berthrong, S. T.; Jobbágy, E. G.; Jackson, R. B.	A global meta-analysis of soil exchangeable cations, pH, carbon, and nitrogen with afforestation	2009		Ecological Applications	19	8	2228-2241
	ex			ex	Gardner, J. B.; Drinkwater, L. E.	The fate of nitrogen in grain cropping systems: A meta-analysis of 15N field experiments	2009		Ecological Applications	19	8	2167-2184
	ex			ex	Liang, Y.; Li, G.; Van Nostrand, J. D.; He, Z.; Wu, L.; Deng, Y.; Zhang, X.; Zhou, J.	Microarray-based analysis of microbial functional diversity along an oil contamination gradient in oil field	2009		FEMS Microbiology Ecology	70	2	324-333
	ex			ex	Boerner, R. E. J.; Huang, J.; Hart, S. C.	Fire, thinning, and the carbon economy: Effects of fire and fire surrogate treatments on estimated carbon storage and sequestration rate	2008		Forest Ecology and Management	255	2021-09-08	3081-3097
	ex			ex	Heidler, J.; Halden, R. U.	Meta-analysis of mass balances examining chemical fate during wastewater treatment	2008		Environmental Science and Technology	42	17	6324-6332
	ex			ex	Lindahl, A. M. L.; Söderström, M.; Jarvis, N.	Influence of input uncertainty on prediction of within-field pesticide leaching risks	2008		Journal of Contaminant Hydrology	98	2021-04-03	106-114
	ex			ex	Tonitto, C.; David, M. B.; Li, C.; Drinkwater, L. E.	Application of the DNDC model to tile-drained Illinois agroecosystems: Model comparison of conventional and diversified rotations	2007		Nutrient Cycling in Agroecosystems	78	1	65-81
	in				Ogle, S. M.; Breidt, F. J.; Paustian, K.	Agricultural management impacts on soil organic carbon storage under moist and dry climatic conditions of temperate and tropical regions	2005		Biogeochemistry	72	1	87-121
	ex			ex	van Kooten, G. C.; Eagle, A. J.; Manley, J.; Smolak, T.	How costly are carbon offsets? A meta-analysis of carbon forest sinks	2004		Environmental Science and Policy	7	4	239-251
	ex			ex	Johnson, D. W.; Curtis, P. S.	Effects of forest management on soil C and N storage: Meta analysis	2001		Forest Ecology and Management	140	2021-03-02	227-238
Added by authors	in				Gattinger, A., Muller, A., Haeni, M., Skinner, C., Fliessbach, A., Buchmann, N., Mäder, P., Stolze, M., Smith, P., Scialabba, N.E.H., Niggli, U.	Enhanced top soil carbon stocks under organic farming	2012		Proc. Natl. Acad. Sci. U. S. A.	109		18226–18231.
Total after exclusion:	31	49	77	386
Total excluded:		18	28	309
			Total:	355
Total	386
Total in	31
Total ex	355

## Sheet: Results per (sub)-criterium
Table S5: Results for all meta-analyses per group and (sub)-criterium
Group	Quality Criteria	Sub-Criteria	Conducted by how many MA? (per sub-criterium)	Conducted by how many MA? (per quality criterium)	Reachable Nr. of MA per quality criterium	Quality criterium fulfilled by how many MA? (%)	Percentages missing to reach possible maximum scores for each quality criterion (%)
Literature search and inclusion / exclusion criteria	1. Literature search	Published literature extracted from	22	49	93	52.6882	47.3118
		Grey literature (unpublished reports and experiments, project reports etc.) included	8
		Keywords/search string reported	19
	2. Authors checked reference lists	yes		7	31	22.5806	77.4194
	3. Inclusion and exclusion criteria reported	yes		28	31	90.3226	9.67742
	4. Treatment and control described	yes		28	31	90.3226	9.67742
	5. Moderators described	yes		19	31	61.2903	38.7097
		Total for group		131	217	60.3687	39.6313
Meta-analysis	6. Effect size	In(R) (log response ratio)	14	23	31	74.1935	25.8065
		Raw mean difference (D) or Standardized mean difference (e.g., Hedges´d)	9
	7. Standard deviation extracted	yes	5	18	31	58.0645	41.9355
		partly	13				100
	8. Studies weighted by 1/variance	yes	4	10	31	32.2581	67.7419
		partly	6				100
	9. Subgroup analysis and meta-regression	yes		14	31	45.1613	54.8387
	10. Model used	yes		16	31	51.6129	48.3871
	11. Software used for meta-analysis	yes		24	31	77.4194	22.5806
	12. Independence of effect sizes	yes		7	31	22.5806	77.4194
	13. Response variables and relevant parameters for their calculation were measured	yes		11	31	35.4839	64.5161
	14. Sensitivity analysis to test robustness of meta-analysis	Outliers and effect size distribution	8	17	62	27.4194	72.5806
		Detecting publication bias	9				100
		Total for group		140	310	45.1613	54.8387
Results and database presentation	15. Result presentation in figures and tables	Summarized effect size and Confidence Intervals (CI)	20	43	93	46.2366	53.7634
		Moderator analysis (sub-group analysis and/or meta-regression)	21
		Forest plot	2
	16. Description of meta-data	yes		21	31	67.7419	32.2581
	17. Full database including most of the following criteria for each study	Full	4	5	31	16.129	83.871
		Partly	1				100
		Total for group		69	155	44.5161	55.4839

## Sheet: IPCC
Table S6: Quick quality assessment of meta-analyses in IPCC report with the help of "cut-off" criteria
First author and year				Harsch et al. 2009	Sathre et al. 2010	Seto et al. 2011	Hergoulac'h et al. 2012	van Kessel et al. (2013)	Challinor et al. 2014	Shcherbaka et al. 2014	Basche et al. 2014	Harris et al. 2015	van Lent et al. 2015	Anderegg et al. 2016	Liang et al. 2016	Schulte-Uebbing et al. 2017	McDaniel et al. 2019	Borchard et al. 2019	Du et al. 2019
Full reference				Harsch, M. A., Hulme, P. E., McGlone, M. S., & Duncan, R. P. (2009). Are treelines advancing? A global meta-analysis of treeline response to climate warming. Ecology Letters, 12(10), 1040–1049. https://doi.org/10.1111/j.1461-0248.2009.01355.x	Sathre, R., & O’Connor, J. (2010). Meta-analysis of greenhouse gas displacement factors of wood product substitution. Environmental Science and Policy, 13(2), 104–114. https://doi.org/10.1016/j.envsci.2009.12.005	Seto, K. C., Fragkias, M., Güneralp, B., & Reilly, M. K. (2011). A meta-analysis of global urban land expansion. PLoS ONE, 6(8). https://doi.org/10.1371/journal.pone.0023777	Hergoualc’h, K. A., & Verchot, L. V. (2012). Changes in soil CH4 fluxes from the conversion of tropical peat swamp forests: a meta-analysis. Journal of Integrative Environmental Sciences, 9(2), 93–101. https://doi.org/10.1080/1943815X.2012.679282	van Kessel, C., Venterea, R., Six, J., Adviento-Borbe, M. A., Linquist, B., & van Groenigen, K. J. (2013). Climate, duration, and N placement determine N2O emissions in reduced tillage systems: A meta-analysis. In Global Change Biology (Vol. 19, Issue 1, pp. 33–44). https://doi.org/10.1111/j.1365-2486.2012.02779.x	Challinor, A. J., Watson, J., Lobell, D. B., Howden, S. M., Smith, D. R., & Chhetri, N. (2014). A meta-analysis of crop yield under climate change and adaptation. Nature Climate Change, 4(4), 287–291. https://doi.org/10.1038/nclimate2153	Shcherbak, I., Millar, N., & Robertson, G. P. (2014). Global metaanalysis of the nonlinear response of soil nitrous oxide (N 2O) emissions to fertilizer nitrogen. Proceedings of the National Academy of Sciences of the United States of America, 111(25), 9199–9204. https://doi.org/10.1073/pnas.1322434111	Basche, A. D., Miguez, F. E., Kaspar, T. C., & Castellano, M. J. (2014). Do cover crops increase or decrease nitrous oxide emissions? a meta-analysis. Journal of Soil and Water Conservation, 69(6), 471–482. https://doi.org/10.2489/jswc.69.6.471	Harris, Z. M., Spake, R., & Taylor, G. (2015). Land use change to bioenergy: A meta-analysis of soil carbon and GHG emissions. Biomass and Bioenergy, 82, 27–39. https://doi.org/10.1016/j.biombioe.2015.05.008	van Lent, J., Hergoualc’H, K., & Verchot, L. v. (2015). Reviews and syntheses: Soil N2O and NO emissions from land use and land-use change in the tropics and subtropics: A meta-analysis. In Biogeosciences (Vol. 12, Issue 23, pp. 7299–7313). Copernicus GmbH. https://doi.org/10.5194/bg-12-7299-2015	Anderegg, W. R. L., Klein, T., Bartlett, M., Sack, L., Pellegrini, A. F. A., Choat, B., & Jansen, S. (2016). Meta-analysis reveals that hydraulic traits explain cross-species patterns of drought-induced tree mortality across the globe. 113(18), 5024–5029. https://doi.org/10.5061/dryad.116j2	Liang, J., Qi, X., Souza, L., & Luo, Y. (2016). Processes regulating progressive nitrogen limitation under elevated carbon dioxide: A meta-analysis. Biogeosciences, 13(9), 2689–2699. https://doi.org/10.5194/bg-13-2689-2016	Schulte-Uebbing, L., & de Vries, W. (2018). Global-scale impacts of nitrogen deposition on tree carbon sequestration in tropical, temperate, and boreal forests: A meta-analysis. Global Change Biology, 24(2), e416–e431. https://doi.org/10.1111/gcb.13862	McDaniel, M. D., Saha, D., Dumont, M. G., Hernández, M., & Adams, M. A. (2019). The Effect of Land-Use Change on Soil CH4 and N2O Fluxes: A Global Meta-Analysis. Ecosystems, 22(6), 1424–1443. https://doi.org/10.1007/s10021-019-00347-z	Borchard, N., Schirrmann, M., Cayuela, M. L., Kammann, C., Wrage-Mönnig, N., Estavillo, J. M., Fuertes-Mendizábal, T., Sigua, G., Spokas, K., Ippolito, J. A., & Novak, J. (2019). Biochar, soil and land-use interactions that reduce nitrate leaching and N2O emissions: A meta-analysis. In Science of the Total Environment (Vol. 651, pp. 2354–2364). Elsevier B.V. https://doi.org/10.1016/j.scitotenv.20…	Du, C., Wang, X., Zhang, M., Jing, J., & Gao, Y. (2019). Effects of elevated CO 2 on plant C-N-P stoichiometry in terrestrial ecosystems: A meta-analysis. Science of the Total Environment, 650, 697–708. https://doi.org/10.1016/j.scitotenv.2018.09.051
Quality assessment by using cutoff criteria
Quality criteria	Sub-criteria	Is criterium applied in Meta-analysis (and to which extend)	Score																	Conducted by how many MA? (per quality criterium)	Sum of scores reached by all MA per quality criterion	Maximum reachable scores per quality criterion	Quality criterium fulfilled by how many MA? (%)	Percentages missing to reach possible maximum scores for each quality criterion (%)
6. Effect size*	In(R) (log response ratio)	-	2	0	0	0	1	2	0	0	2	2	1	1	2	2	2	2	2	8	16	32	50	50
	Raw mean difference (D)	-	1																	3
	Standardized mean difference (e.g., Hedges' d)	-	1
	Non-standard metrics used or not calculated	-	0																	5
7. Standard deviation extracted (or computed from statistics)*	-	From each study	2	0	0	0	2	0	0	0	2	2	2	0	2	2	0	2	2	9	17	32	53.125	46.875
		From some studies	1																	0
		Not extracted	0										2	no			no			8
8. Studies weighted by 1/variance*		For each study	4	0	0	0	0	0	0	0	4	4	4	0	4	4	0	4	4	7	16	64	25	75
		For some studies	1																	0
		Not weighted / reported	0																	9
Is this article a rigorous meta-analysis?				no	no	no	no	no	no	no	yes	yes	yes	no	yes	yes	no	yes	yes

## Sheet: Scores for MA passing cut-off
Table S7: Results for criteria 1-5 and 9-17 from meta-analyses that passed and did not pass the “cut-off” criteria
Group	Quality Criteria	Sub-Criteria	Number of "true" MA that fulfilled criterium	MAX	Percentage of "true" MA that fulfilled criterium		How many of 27 MA (without true MA) did fulfill the criterium?	MAX	Quality criterium fulfilled by how many MA? (%)
Literature search and inclusion / exclusion criteria	1. Literature search	Published literature extracted from	4	93	9.67742		18	93	43.0108
		Grey literature (unpublished reports and experiments, project reports etc.) included	1				7
		Keywords/search string reported	4				15
	2. Authors checked reference lists	yes	4	31	12.9032		3	31	9.67742
	3. Inclusion and exclusion criteria reported	yes	4	31	12.9032		24	31	77.4194
	4. Treatment and control described	yes	4	31	12.9032		24	31	77.4194
	5. Moderators described	yes	4	31	12.9032		15	31	48.3871
		Total for group	25	217	11.5207		113	217	52.0737
Meta-analysis	9. Subgroup analysis and meta-regression	yes	2	31	6.45161		12	31	38.7097
	10. Model used	yes	3	31	9.67742		13	31	41.9355
	11. Software used for meta-analysis	yes	4	31	12.9032		20	31	64.5161
	12. Independence of effect sizes	yes	1	31	3.22581		6	31	19.3548
	13. Response variables and relevant parameters for their calculation were measured	yes	2	31	6.45161		9	31	29.0323
	14. Sensitivity analysis to test robustness of meta-analysis	Outliers and effect size distribution	1	62	4.83871		7	62	22.5806
		Detecting publication bias	2				7
		Total for group	15	217	6.91244		113	217	52.0737
Results and database presentation	15. Result presentation in figures and tables	Summarized effect size and Confidence Intervals (CI)	4	93	9.67742		16	93	36.5591
		Moderator analysis (sub-group analysis and/or meta-regression)	4				17
		Forest plot	1				1
	16. Description of meta-data	yes	1	31	3.22581		20	31	64.5161
	17. Full database including most of the following criteria for each study	Full	2	31	6.45161		2	31	9.67742
		Partly	0				1
		Total for group	12	155	7.74194		57	155	36.7742

## Sheet: Template
Table S8: Template for quality assessment
Group		Quality criteria	Sub-criteria	Is criterion applied in Meta-analysis (and to what extent)	Score	Description	Full references	Meta-analysis 1	Meta-analysis 2	Meta-analysis 3	Meta-analysis 4	Meta-analysis 5	Meta-analysis 6	Meta-analysis 7	Meta-analysis 8	Meta-analysis 9	Meta-analysis 10
Literature search and inclusion / exclusion criteria		1. Literature search	Published literature extracted from	> 4 databases	3	Several databases should be used for extracting published literature to reduce the risk of selection bias	"It might be tempting to use a single database, such as the widely available Web of Science. However, no database is complete, and the use of multiple databases will make the search more comprehensive (thereby reducing selection bias)" (Côté et al. 2013, p. 40).
				between 2 and 4 databases	2
				1 database	1
				not reported	0
			Grey literature (unpublished reports and experiments, project reports etc.) included	yes	1	Grey literature maximizes comprehensiveness and reduces risk of bias. Whether conducting a grey literature research is necessary or not is dependent on the meta-analysis itself and needs to be assessed by the authors	"Despite the increased resources that are needed to locate and retrieve data from sources such as dissertations, theses, conference papers, government and technical reports and the like, it is generally indefensible to conduct a synthesis that categorically excludes these types of research reports. Potential benefits and costs of grey literature searches must be balanced against each other" (Bore…
				no	0
			Keywords/search string reported	yes	1	The search string(s) used to retrieve literature from different databases should be stated	"The search strategy will list all the search terms you anticipate using when searching electronic databases. The choice of keywords is critical" (Côté et al. 2013, p. 43).
				no	0
		2. Authors checked the reference lists of other existing meta-analyses and reviews for available literature		yes	1	Ensures the inclusion of more relevant articles, as occasionally, keyword searching in databases does not provide results for all available literature	"Even with the advent of (and perhaps partly due to an over-reliance on) electronic searching, it is likely that some studies which meet our criteria will escape our search and not be included in the analysis" (Borenstein et al. 2009, p. 278).
				no	0
		3. Inclusion and exclusion criteria reported		yes	1	Inclusion and exclusion criteria should be clearly described and decisions for exclusion of studies should be transparent	"When planning a systematic review we develop a set of inclusion criteria that govern the types of studies that we want to include" (Borenstein et al. 2009, p. 278). "Outline clear study selection criteria so that the reasons for inclusion or exclusion of studies are transparent" (Côté et al. 2013, p. 50).
				no	0
		4. Control (C) and treatment (T) described		yes	1	Inclusion of studies on the same research topic and avoiding mixing "apples and oranges". The controls of included studies should be comparable to allow the correct computation of the treatment and moderator effect	"There are four critical components to questions regarding effectiveness posed in a research synthesis: (1) the subject (population or subpopulation to be examined), (2) the intervention (treatment or other independent variable of interest), (3) the outcome(s) or responses of interest, and (4) where applicable, the comparison or control group" (Stewart et al. 2013, p. 28).
				no	0
		5. Moderators and their ranges or groups described		yes	1	Defining moderators is essential to evaluate the source of variation across studies. Their ranges or groups are important to indicate the limits within which moderators were studied	"Numerous moderators (covariates) may influence effect sizes; these may be related to any of the key question components. [...] Where the data are discrete, sub-groups should be defined" (Stewart et al. 2013, p. 32).
				no	0
	Cutoff criteria	6. Effect size	In(R) (log response ratio)		2	Easily interpretable by back-transformation of ln(R) to a percentage change from the control	"The response ratio R (Hedges et al. 1999) is the ratio of the means of the two groups (e.g., experimental and control); it is useful when one wishes to compare the magnitudes of two means with the same sign. However, ratios generally have poor statistical properties so one generally transforms the ratio to a metric with more desirable properties using the natural log" (Rosenberg et al. 2013, p. …
			Raw mean difference (D)		1	Not recommended for meta-analyses having a range of control levels/scales. Example: when SOC stocks are studied, initial values can have a wide range (10-100 t ha-1)	"When the outcome is reported on a meaningful scale and all studies in the analysis use the same scale, the meta-analysis can be performed directly on the raw difference in means [...]. By contrast, when the measure is less well known (for example, a proprietary scale with limited distribution), the use of a raw mean difference has less to recommend it" (Borenstein et al. 2009, p. 21ff).
			Standardized mean difference (e.g., Hedges' d)		1	Difficult to interpret: |d | = 0.2 – small effects |d | = 0.5 – moderate effects |d | = 0.8 – large effects	"[...] the standardized mean difference reflects the difference between the distributions in the two groups (and how each represents a distinct cluster of scores) even if they do not measure exactly the same outcome (see Cohen 1987, Grissom and Kim 2005)" (Borenstein et al. 2009, p. 26). "Osenberg et al. (1997) and others have criticized the use of the standardized mean difference because it may …
			Non-standard metrics used or not calculated		0	Without the calculation of effect sizes, a synthesis does not qualify as a meta-analysis (all following quality criteria of group "Meta-analysis" account for 0)	"We strongly recommend that the term ‘meta-analysis’ be used only when metrics of effect size are combined across studies. In addition, we strongly encourage authors who are attempting quantitative syntheses of inadequate data sets not to use inadequate and misleading statistical methods to carry out these syntheses" (Koricheva and Gurevitch 2014, p. 840)
		7. Standard deviation extracted (or computed from statistics)		From each study	2	Standard deviations (SDs) need to be extracted (or computed from available statistics, see Acutis et al. (2022)) from all studies in order to calculate the weight for each study. If SDs were extracted only from some studies and the rest was ignored or roughly estimated by e.g., calculating the overall mean SD of the available SD, a score of "1" was assigned	"Two major cases of missing data in meta-analysis are: 1) a lack of the information required to obtain sampling variance for a portion of the dataset (for example, missing standard deviations) […]" (Nakagawa et al. 2017, p.11).
				From some studies	1
				Not extracted	0
		8. Studies weighted by 1/variance		For each study	4	Weighting of studies is only correct when done by the inverse of variance. Meta-analyses that extracted SD only for some studies but weighted by 1/variance did weigh "some studies" or "partly"	"A key aspect of modern approaches to meta-analysis is accounting for unequal precision in the magnitude of the effect among studies by weighting each study’s effect size by the inverse of its variance" (Koricheva and Gurevitch 2013, p. 9).
				For some studies	1
				Not weighted / reported	0
		9. Subgroup analysis and meta-regression		yes	1	Categorical and/or continuous moderators should be assessed by Q-test	"A categorical summary analysis is a modern meta-analysis in which the individual studies can be categorized into more than one group. [...] The between-group heterogeneity, QB, describes the variation between group cumulative effect sizes. [...] Continuous summary analyses perform a weighted linear regression analysis of effect sizes versus an independent variable. Model heterogeneity, QM, descr…
Meta-analysis				no	0
		10. Model used	Random-effect or mixed-effect model		1	When conducting a meta-analysis in the field of agriculture, the random-effect or mixed-effect model should be chosen, as it acknowledges between-study variation	"In ecological and evolutionary meta-analyses, although we may acknowledge that the study estimates are measuring the same overall effect, we also typically want to account for additional variation in study-specific effects that are due to different experimental conditions, locations, and so on. In this case, we do not want to explicitly characterize or model these differences, but we do want to …
			Fixed-effect model		0
			No model reported		0
		11. Software used for meta-analysis		Meta-analytical software (as MetaWin, Metafor package, etc.) or other software (as SPSS, SAS, Stata, R, etc.)	1	Used software should be stated; when using general statistical analysis software, correct model choice (weighted + random model) and implementation are necessary	"To conduct a meta-analysis, a researcher will need to use computer software to perform all but the simplest calculations. There are three types of software that can be used, depending upon the needs of the user. The first option is a spreadsheet, the second is a general purpose statistical package, and the third option is a program developed expressly to carry out meta- analysis. [...] In the pa…
				Spreadsheet (as MS Excel) or not reported	0
		12. Effect sizes are independent		1-2 effect sizes per study/site extracted	1	Effect sizes should be independent. For each study or site, one effect size should be extracted. When several combinations of treatment and control were studied, only one effect size per study or site should be extracted	"If several different measurements are made on each replicate in a study (e.g., measures at several points in time or of slightly different outcomes) and different effect sizes are computed from each, the different effect sizes may be correlated because the data on which they are based are correlated" (Gurevitch and Hedges 1999, p. 1147). "Including different studies, extracting data, estimating …
				> 2 effect sizes per study/site extracted	0
		13. Response variables and relevant parameters for their calculation were measured		yes	1	Response variables need to be measured in an experiment, not estimated or modelled (e.g., pedotransfer functions only provide estimates for bulk density and therefor introduce the risk of inaccurate calculation of SOC stock contents)	"[...] differences in selected PTFs [pedotransfer functions] are an important source of uncertainty in SOC storage estimation at large scales" (Xu et al. 2015, p. 1574).
				no	0
		14. Sensitivity analysis to test robustness of meta-analysis	Outliers and effect size distribution	yes	1	Presence of outliers should be tested and can be identified via effect size distribution in weighted histograms, box-plots, etc.	"The distribution of effect sizes in the data set being synthesized should be examined for possible outliers, as it is not unusual to find anomalously large (or small) values that can have a disproportionate and misleading effect on the analysis results" (Rothstein et al. 2013, p. 333).
				no	0
			Testing for publication bias	yes	1	Magnitude of publication bias should be estimated by funnel plots, Egger's regression or Fail-safe test	"It is almost always important to include an assessment of publication bias in relation to a meta-analysis. It will either assure the reviewer that the results are robust, or alert them that the results are suspect. This is important to ensure the integrity of the individual meta-analysis" (Borenstein et al. 2009, p. 291).
				no	0
Results and database presentation		15. Results presentation in figures and tables	Summarized effect size and Confidence Intervals	yes	1	Summarized effect size and confidence intervals should be presented in a table or figure	"The summary effect is nothing more than the weighted mean of the individual effects" (Borenstein et al. 2009, p. 6).
				no	0
			Moderator analysis (sub-group analysis and/or meta-regression)	yes	1	Moderator (covariates) analysis should be presented in form of figures or tables	"Often […] the treatment effect will vary as a function of study-level covariates [...]. In these cases, a proper synthesis requires that the researcher be able to understand how the treatment effect varies as a function of these variables [...]" (Borenstein et al. 2009, p. xxii).
				no	0
			Forest plot	yes	1	Forest plots enable the graphical presentation of individual effect sizes of studies and the overall effect size including confidence intervals	Forest plots "show effect sizes and confidence intervals from individual studies as well as group or overall mean effects and confidence intervals. [...] Forest plots are an excellent tool to communicate individual and mean effect sizes, weighting of studies, and variation or likelihood" (Lortie et al. 2013, p. 344f).
				no	0
		16. Description of meta-data		yes	1	A description of meta-data (authors and year plus experimental location, treatments, etc.) in the article or appendix should to be provided as a table	"The metadata about scientific experiments are essential for finding, retrieving, and reusing the scientific data stored in online repositories. Finding relevant scientific data requires not only that the data simply be accompanied by metadata, but also that the metadata be of sufficient quality for the corresponding datasets to be discovered and reused" (Gonçalves and Musen 2019, p. 2).
				no	0
		17. Full database including most of the following criteria for each study	Article ID and/or first author plus year	Available and includes most of the listed criteria; Article ID and/or first author plus year must be described; either effect size or mean, SD and sample size of T/C must be described	2	Each study should have a distinctive number to allow easy identification	-
						First author and year of publication should be stated	-
			Country/location			Country and exact location of experiment	-
			Control (C)			Measure used as control	-
			Treatment (T)			Measure under investigation	-
			Moderators			Possible moderators (pedo-climatic, experimental conditions, duration of experiments, land use/crops/cropping systems)	"There are a number of other data entry elements that are common across extraction spread-sheets. For experimental studies, these include details of the research methods or experimental conditions that might affect the results (laboratory vs. field-based treatments, size or type of growth containers, etc.) […]" (Curtis et al. 2013 p. 53).
			Means of C/T			Means, SDs and sample sizes of treatment and control should be stated to allow replication of the meta-analysis	"This [the development of an appropriate data extraction spreadsheet] constitutes the link between each primary study and the ultimate research review and as such, informs the meta-analysis model with data for effect size estimation and associated information" (Curtis et al. 2013, p. 52).
			Standard deviations of C/T
			Sample sizes C/T
			Effect size			Calculated effect sizes should be stated
			Article ID and/or first author plus year	Available and includes the listed criteria (either effect size or mean, SD and sample size of T/C must be described)	1	see above in point 17	see above in point 17
			Means of C/T
			Standard deviations of C/T
			Sample sizes C/T
			Effect size
				Not available or includes less information than score 1	0	If no database is provided, the meta-analysis is not transparent	"A file or database with the final reconciled data should be included with the final report" (Mayo-Wilson and Grant, 2019, p. 481).
				Maximum reachable score per meta-analysis:	30
							Total score	0	0	0	0	0	0	0	0	0	0
